# Supplementary material for: Ideas and perspectives: The fluctuating nature of oxygen shapes the ecology of aquatic habitats and their biogeochemical cycles – the aquatic oxyscape
Source: Copernicus journal article supplement (doi:10.5194/bg-20-3509-2023), 2023-08-23
Supplement: Supplementary file 1 [file bg-20-3509-2023-supplement.zip]

Archive with 2 entries (2 files):
- bg-20-3509-2023-supplement-title-page.pdf
- Fusi et al Supplementary Dataset Figure1_2_3.xlsx
