# Supplementary material for: Ideas and perspectives: The fluctuating nature of oxygen shapes the ecology of aquatic habitats and their biogeochemical cycles – the aquatic oxyscape
Source: Copernicus journal article supplement (doi:10.5194/bg-20-3509-2023), 2023-08-23
Supplement: Supplementary file 1 [file bg-20-3509-2023-supplement.zip › bg-20-3509-2023-supplement-title-page.pdf]

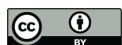

## *Supplement of*

# **Ideas and perspectives: The fluctuating nature of oxygen shapes the ecology of aquatic habitats and their biogeochemical cycles – the aquatic oxyscape**

**Marco Fusi et al.**

*Correspondence to:* Marco Fusi ([marco.fusi@kaust.edu.sa](mailto:marco.fusi@kaust.edu.sa)) and Folco Gioni ([folcog@gmail.com](mailto:folcog@gmail.com))

- [bg-20-3509-2023-supplement-title-page.pdf](#)
- [Fusi et al Supplementary Dataset Figure1\\_2\\_3.xlsx](#)

The copyright of individual parts of the supplement might differ from the article licence.
