# Supplementary material for: Ideas and perspectives: The fluctuating nature of oxygen shapes the ecology of aquatic habitats and their biogeochemical cycles – the aquatic oxyscape
Source: Copernicus journal article supplement (doi:10.5194/bg-20-3509-2023), 2023-08-23
Supplement: Supplementary file 1 [file bg-20-3509-2023-supplement.zip › Fusi et al Supplementary Dataset Figure1_2_3.xlsx]

## Sheet: Source Fig1 and 2
Environment	Time	Temperature	Dissolved_Oxygen	Dissolved_Oxygen_Saturation	Status	Ox2	Time
Dyke	2019-09-21 14:59:00	20.747	8.419	93.9737	0	93.9737	2019-09-21
Dyke	2019-09-21 15:09:00	19.995	4.198	46.1676	0	46.1676	2019-09-21
Dyke	2019-09-21 15:19:00	19.007	5.74	61.8888	0	61.8888	2019-09-21
Dyke	2019-09-21 15:29:00	18.847	12.799	137.554	0	137.554	2019-09-21
Dyke	2019-09-21 15:39:00	19.166	14.264	154.289	0	154.289	2019-09-21
Dyke	2019-09-21 15:49:00	19.233	14.205	153.858	0	153.858	2019-09-21
Dyke	2019-09-21 15:59:00	19.275	14.442	156.557	0	156.557	2019-09-21
Dyke	2019-09-21 16:09:00	19.208	14.316	154.982	0	154.982	2019-09-21
Dyke	2019-09-21 16:19:00	19.149	14.085	152.3	0	152.3	2019-09-21
Dyke	2019-09-21 16:29:00	19.074	14.041	151.595	0	151.595	2019-09-21
Dyke	2019-09-21 16:39:00	19.074	13.97	150.829	0	150.829	2019-09-21
Dyke	2019-09-21 16:49:00	18.923	13.923	149.864	0	149.864	2019-09-21
Dyke	2019-09-21 16:59:00	18.847	13.877	149.139	0	149.139	2019-09-21
Dyke	2019-09-21 17:09:00	18.738	13.837	148.381	0	148.381	2019-09-21
Dyke	2019-09-21 17:19:00	18.578	13.877	148.327	0	148.327	2019-09-21
Dyke	2019-09-21 17:29:00	18.536	13.871	148.137	0	148.137	2019-09-21
Dyke	2019-09-21 17:39:00	18.343	13.961	148.513	0	148.513	2019-09-21
Dyke	2019-09-21 17:49:00	18.2	14.19	150.508	0	150.508	2019-09-21
Dyke	2019-09-21 17:59:00	17.99	14.516	153.305	0	153.305	2019-09-21
Dyke	2019-09-21 18:09:00	17.821	14.994	157.804	0	157.804	2019-09-21
Dyke	2019-09-21 18:19:00	17.694	14.537	152.594	0	152.594	2019-09-21
Dyke	2019-09-21 18:29:00	17.492	14.728	153.955	0	153.955	2019-09-21
Dyke	2019-09-21 18:39:00	17.306	14.862	154.758	0	154.758	2019-09-21
Dyke	2019-09-21 18:49:00	17.187	14.884	154.604	0	154.604	2019-09-21
Dyke	2019-09-21 18:59:00	17.035	14.91	154.385	0	154.385	2019-09-21
Dyke	2019-09-21 19:09:00	16.891	14.883	153.643	0	153.643	2019-09-21
Dyke	2019-09-21 19:19:00	16.73	14.878	153.074	0	153.074	2019-09-21
Dyke	2019-09-21 19:29:00	16.602	14.797	151.833	0	151.833	2019-09-21
Dyke	2019-09-21 19:39:00	16.415	14.779	151.052	0	151.052	2019-09-21
Dyke	2019-09-21 19:49:00	16.245	14.733	150.043	0	150.043	2019-09-21
Dyke	2019-09-21 19:59:00	16.143	14.696	149.344	0	149.344	2019-09-21
Dyke	2019-09-21 20:09:00	16.049	14.489	146.947	0	146.947	2019-09-21
Dyke	2019-09-21 20:19:00	15.947	14.426	145.992	0	145.992	2019-09-21
Dyke	2019-09-21 20:29:00	15.827	14.321	144.56	0	144.56	2019-09-21
Dyke	2019-09-21 20:39:00	15.656	14.379	144.617	0	144.617	2019-09-21
Dyke	2019-09-21 20:49:00	15.587	14.341	144.023	0	144.023	2019-09-21
Dyke	2019-09-21 20:59:00	15.493	14.31	143.423	0	143.423	2019-09-21
Dyke	2019-09-21 21:09:00	15.433	14.244	142.578	0	142.578	2019-09-21
Dyke	2019-09-21 21:19:00	15.347	14.232	142.195	0	142.195	2019-09-21
Dyke	2019-09-21 21:29:00	15.201	14.279	142.218	0	142.218	2019-09-21
Dyke	2019-09-21 21:39:00	15.133	14.411	143.323	0	143.323	2019-09-21
Dyke	2019-09-21 21:49:00	15.072	14.319	142.221	0	142.221	2019-09-21
Dyke	2019-09-21 21:59:00	15.004	14.243	141.259	0	141.259	2019-09-21
Dyke	2019-09-21 22:09:00	14.892	14.226	140.749	0	140.749	2019-09-21
Dyke	2019-09-21 22:19:00	14.883	14.172	140.187	0	140.187	2019-09-21
Dyke	2019-09-21 22:29:00	14.814	14.144	139.702	0	139.702	2019-09-21
Dyke	2019-09-21 22:39:00	14.771	14.106	139.197	0	139.197	2019-09-21
Dyke	2019-09-21 22:49:00	14.71	14.071	138.668	0	138.668	2019-09-21
Dyke	2019-09-21 22:59:00	14.641	14.079	138.539	0	138.539	2019-09-21
Dyke	2019-09-21 23:09:00	14.555	14.026	137.76	0	137.76	2019-09-21
Dyke	2019-09-21 23:19:00	14.529	13.973	137.161	0	137.161	2019-09-21
Dyke	2019-09-21 23:29:00	14.434	13.953	136.682	0	136.682	2019-09-21
Dyke	2019-09-21 23:39:00	14.451	13.885	136.066	0	136.066	2019-09-21
Dyke	2019-09-21 23:49:00	14.382	13.861	135.627	0	135.627	2019-09-21
Dyke	2019-09-21 23:59:00	14.347	13.788	134.81	0	134.81	2019-09-21
Dyke	2019-09-22 00:09:00	14.339	13.382	130.817	0	130.817	2019-09-22
Dyke	2019-09-22 00:19:00	14.278	13.645	133.21	0	133.21	2019-09-22
Dyke	2019-09-22 00:29:00	14.217	13.176	128.46	0	128.46	2019-09-22
Dyke	2019-09-22 00:39:00	14.183	13.359	130.148	0	130.148	2019-09-22
Dyke	2019-09-22 00:49:00	14.139	13.337	129.808	0	129.808	2019-09-22
Dyke	2019-09-22 00:59:00	13.983	13.32	129.2	0	129.2	2019-09-22
Dyke	2019-09-22 01:09:00	13.991	13.251	128.553	0	128.553	2019-09-22
Dyke	2019-09-22 01:19:00	13.87	13.227	127.979	0	127.979	2019-09-22
Dyke	2019-09-22 01:29:00	13.852	13.03	126.023	0	126.023	2019-09-22
Dyke	2019-09-22 01:39:00	13.835	12.981	125.502	0	125.502	2019-09-22
Dyke	2019-09-22 01:49:00	13.783	12.931	124.876	0	124.876	2019-09-22
Dyke	2019-09-22 01:59:00	13.695	12.922	124.547	0	124.547	2019-09-22
Dyke	2019-09-22 02:09:00	13.678	12.848	123.787	0	123.787	2019-09-22
Dyke	2019-09-22 02:19:00	13.634	12.73	122.531	0	122.531	2019-09-22
Dyke	2019-09-22 02:29:00	13.634	12.66	121.857	0	121.857	2019-09-22
Dyke	2019-09-22 02:39:00	13.66	12.552	120.887	0	120.887	2019-09-22
Dyke	2019-09-22 02:49:00	13.564	12.545	120.563	0	120.563	2019-09-22
Dyke	2019-09-22 02:59:00	13.634	12.479	120.115	0	120.115	2019-09-22
Dyke	2019-09-22 03:09:00	13.643	12.414	119.513	0	119.513	2019-09-22
Dyke	2019-09-22 03:19:00	13.608	12.381	119.103	0	119.103	2019-09-22
Dyke	2019-09-22 03:29:00	13.652	12.269	118.141	0	118.141	2019-09-22
Dyke	2019-09-22 03:39:00	13.634	12.175	117.189	0	117.189	2019-09-22
Dyke	2019-09-22 03:49:00	13.599	12.051	115.906	0	115.906	2019-09-22
Dyke	2019-09-22 03:59:00	13.599	12.037	115.771	0	115.771	2019-09-22
Dyke	2019-09-22 04:09:00	13.547	12.003	115.311	0	115.311	2019-09-22
Dyke	2019-09-22 04:19:00	13.582	11.88	114.218	0	114.218	2019-09-22
Dyke	2019-09-22 04:29:00	13.538	11.837	113.694	0	113.694	2019-09-22
Dyke	2019-09-22 04:39:00	13.556	11.703	112.452	0	112.452	2019-09-22
Dyke	2019-09-22 04:49:00	13.538	11.652	111.917	0	111.917	2019-09-22
Dyke	2019-09-22 04:59:00	13.521	11.608	111.452	0	111.452	2019-09-22
Dyke	2019-09-22 05:09:00	13.529	11.534	110.761	0	110.761	2019-09-22
Dyke	2019-09-22 05:19:00	13.503	11.476	110.141	0	110.141	2019-09-22
Dyke	2019-09-22 05:29:00	13.521	11.402	109.474	0	109.474	2019-09-22
Dyke	2019-09-22 05:39:00	13.512	11.279	108.272	0	108.272	2019-09-22
Dyke	2019-09-22 05:49:00	13.451	11.222	107.579	0	107.579	2019-09-22
Dyke	2019-09-22 05:59:00	13.433	11.217	107.488	0	107.488	2019-09-22
Dyke	2019-09-22 06:09:00	13.442	11.186	107.213	0	107.213	2019-09-22
Dyke	2019-09-22 06:19:00	13.486	11.134	106.818	0	106.818	2019-09-22
Dyke	2019-09-22 06:29:00	13.46	11.105	106.479	0	106.479	2019-09-22
Dyke	2019-09-22 06:39:00	13.468	11.062	106.085	0	106.085	2019-09-22
Dyke	2019-09-22 06:49:00	13.503	10.977	105.352	0	105.352	2019-09-22
Dyke	2019-09-22 06:59:00	13.512	10.854	104.192	0	104.192	2019-09-22
Dyke	2019-09-22 07:09:00	13.451	10.883	104.329	0	104.329	2019-09-22
Dyke	2019-09-22 07:19:00	13.468	10.826	103.822	0	103.822	2019-09-22
Dyke	2019-09-22 07:29:00	13.521	10.78	103.502	0	103.502	2019-09-22
Dyke	2019-09-22 07:39:00	13.538	10.799	103.724	0	103.724	2019-09-22
Dyke	2019-09-22 07:49:00	13.626	10.917	105.062	0	105.062	2019-09-22
Dyke	2019-09-22 07:59:00	13.643	11.218	107.999	0	107.999	2019-09-22
Dyke	2019-09-22 08:09:00	13.756	11.516	111.145	0	111.145	2019-09-22
Dyke	2019-09-22 08:19:00	13.974	11.697	113.435	0	113.435	2019-09-22
Dyke	2019-09-22 08:29:00	14.087	12.126	117.887	0	117.887	2019-09-22
Dyke	2019-09-22 08:39:00	14.139	12.515	121.808	0	121.808	2019-09-22
Dyke	2019-09-22 08:49:00	14.148	12.907	125.648	0	125.648	2019-09-22
Dyke	2019-09-22 08:59:00	14.313	12.849	125.535	0	125.535	2019-09-22
Dyke	2019-09-22 09:09:00	14.365	12.496	122.225	0	122.225	2019-09-22
Dyke	2019-09-22 09:19:00	14.425	13.272	129.985	0	129.985	2019-09-22
Dyke	2019-09-22 09:29:00	14.529	12.846	126.099	0	126.099	2019-09-22
Dyke	2019-09-22 09:39:00	14.633	12.383	121.829	0	121.829	2019-09-22
Dyke	2019-09-22 09:49:00	14.805	12.584	124.269	0	124.269	2019-09-22
Dyke	2019-09-22 09:59:00	14.892	13.008	128.698	0	128.698	2019-09-22
Dyke	2019-09-22 10:09:00	15.115	12.77	126.953	0	126.953	2019-09-22
Dyke	2019-09-22 10:19:00	15.313	12.896	128.753	0	128.753	2019-09-22
Dyke	2019-09-22 10:29:00	15.57	13.382	134.343	0	134.343	2019-09-22
Dyke	2019-09-22 10:39:00	15.878	13.544	136.865	0	136.865	2019-09-22
Dyke	2019-09-22 10:49:00	16.194	13.618	138.538	0	138.538	2019-09-22
Dyke	2019-09-22 10:59:00	16.39	13.645	139.389	0	139.389	2019-09-22
Dyke	2019-09-22 11:09:00	16.798	13.746	141.629	0	141.629	2019-09-22
Dyke	2019-09-22 11:19:00	16.738	14.097	145.063	0	145.063	2019-09-22
Dyke	2019-09-22 11:29:00	16.832	14.262	147.05	0	147.05	2019-09-22
Dyke	2019-09-22 11:39:00	17.043	14.208	147.141	0	147.141	2019-09-22
Dyke	2019-09-22 11:49:00	17.281	13.37	139.15	0	139.15	2019-09-22
Dyke	2019-09-22 11:59:00	17.34	13.984	145.718	0	145.718	2019-09-22
Dyke	2019-09-22 12:09:00	17.509	14.13	147.756	0	147.756	2019-09-22
Dyke	2019-09-22 12:19:00	17.846	14.128	148.766	0	148.766	2019-09-22
Dyke	2019-09-22 12:29:00	18.032	14.254	150.668	0	150.668	2019-09-22
Dyke	2019-09-22 12:39:00	18.217	14.188	150.539	0	150.539	2019-09-22
Dyke	2019-09-22 12:49:00	18.251	14.104	149.752	0	149.752	2019-09-22
Dyke	2019-09-22 12:59:00	18.124	14.133	149.671	0	149.671	2019-09-22
Dyke	2019-09-22 13:09:00	18.192	14.231	150.918	0	150.918	2019-09-22
Dyke	2019-09-22 13:19:00	18.503	14.71	156.991	0	156.991	2019-09-22
Dyke	2019-09-22 13:29:00	18.637	14.865	159.078	0	159.078	2019-09-22
Dyke	2019-09-22 13:39:00	18.679	14.639	156.794	0	156.794	2019-09-22
Dyke	2019-09-22 13:49:00	18.637	14.547	155.675	0	155.675	2019-09-22
Dyke	2019-09-22 13:59:00	18.629	14.118	151.06	0	151.06	2019-09-22
Dyke	2019-09-22 14:09:00	18.553	14.047	150.068	0	150.068	2019-09-22
Dyke	2019-09-22 14:19:00	18.62	14.046	150.262	0	150.262	2019-09-22
Dyke	2019-09-22 14:29:00	18.646	14.473	154.912	0	154.912	2019-09-22
Dyke	2019-09-22 14:39:00	19.09	14.698	158.74	0	158.74	2019-09-22
Dyke	2019-09-22 14:49:00	19.199	15.624	169.112	0	169.112	2019-09-22
Dyke	2019-09-22 14:59:00	19.375	15.772	171.318	0	171.318	2019-09-22
Dyke	2019-09-22 15:09:00	19.76	16.012	175.27	0	175.27	2019-09-22
Dyke	2019-09-22 15:19:00	19.961	16.429	180.556	0	180.556	2019-09-22
Dyke	2019-09-22 15:29:00	20.02	16.898	185.928	0	185.928	2019-09-22
Dyke	2019-09-22 15:39:00	20.095	15.877	174.955	0	174.955	2019-09-22
Dyke	2019-09-22 15:49:00	20.095	15.34	169.037	0	169.037	2019-09-22
Dyke	2019-09-22 15:59:00	20.095	15.03	165.621	0	165.621	2019-09-22
Dyke	2019-09-22 16:09:00	20.103	15.794	174.068	0	174.068	2019-09-22
Dyke	2019-09-22 16:19:00	20.112	15.078	166.206	0	166.206	2019-09-22
Dyke	2019-09-22 16:29:00	20.137	14.552	160.488	0	160.488	2019-09-22
Dyke	2019-09-22 16:39:00	19.794	14.01	153.46	0	153.46	2019-09-22
Dyke	2019-09-22 16:49:00	19.442	13.509	146.935	0	146.935	2019-09-22
Dyke	2019-09-22 16:59:00	19.258	13.512	146.425	0	146.425	2019-09-22
Dyke	2019-09-22 17:09:00	18.931	13.583	146.228	0	146.228	2019-09-22
Dyke	2019-09-22 17:19:00	18.688	13.529	144.931	0	144.931	2019-09-22
Dyke	2019-09-22 17:29:00	18.553	13.285	141.927	0	141.927	2019-09-22
Dyke	2019-09-22 17:39:00	18.368	13.084	139.254	0	139.254	2019-09-22
Dyke	2019-09-22 17:49:00	18.259	12.984	137.883	0	137.883	2019-09-22
Dyke	2019-09-22 17:59:00	17.981	12.926	136.487	0	136.487	2019-09-22
Dyke	2019-09-22 18:09:00	17.897	12.693	133.796	0	133.796	2019-09-22
Dyke	2019-09-22 18:19:00	17.77	12.546	131.901	0	131.901	2019-09-22
Dyke	2019-09-22 18:29:00	17.669	12.398	130.074	0	130.074	2019-09-22
Dyke	2019-09-22 18:39:00	17.602	12.365	129.549	0	129.549	2019-09-22
Dyke	2019-09-22 18:49:00	17.543	12.338	129.108	0	129.108	2019-09-22
Dyke	2019-09-22 18:59:00	17.458	12.252	127.983	0	127.983	2019-09-22
Dyke	2019-09-22 19:09:00	17.348	12.196	127.108	0	127.108	2019-09-22
Dyke	2019-09-22 19:19:00	17.213	12.234	127.147	0	127.147	2019-09-22
Dyke	2019-09-22 19:29:00	17.103	12.018	124.616	0	124.616	2019-09-22
Dyke	2019-09-22 19:39:00	17.018	11.871	122.874	0	122.874	2019-09-22
Dyke	2019-09-22 19:49:00	16.967	11.768	121.679	0	121.679	2019-09-22
Dyke	2019-09-22 19:59:00	16.849	11.709	120.77	0	120.77	2019-09-22
Dyke	2019-09-22 20:09:00	16.823	11.789	121.529	0	121.529	2019-09-22
Dyke	2019-09-22 20:19:00	16.781	11.775	121.278	0	121.278	2019-09-22
Dyke	2019-09-22 20:29:00	16.687	11.818	121.482	0	121.482	2019-09-22
Dyke	2019-09-22 20:39:00	16.628	11.746	120.592	0	120.592	2019-09-22
Dyke	2019-09-22 20:49:00	16.56	11.681	119.753	0	119.753	2019-09-22
Dyke	2019-09-22 20:59:00	16.483	11.533	118.045	0	118.045	2019-09-22
Dyke	2019-09-22 21:09:00	16.458	11.525	117.901	0	117.901	2019-09-22
Dyke	2019-09-22 21:19:00	16.373	11.553	117.976	0	117.976	2019-09-22
Dyke	2019-09-22 21:29:00	16.381	11.675	119.242	0	119.242	2019-09-22
Dyke	2019-09-22 21:39:00	16.279	11.768	119.933	0	119.933	2019-09-22
Dyke	2019-09-22 21:49:00	16.322	11.872	121.103	0	121.103	2019-09-22
Dyke	2019-09-22 21:59:00	16.185	12.059	122.655	0	122.655	2019-09-22
Dyke	2019-09-22 22:09:00	16.16	12.105	123.058	0	123.058	2019-09-22
Dyke	2019-09-22 22:19:00	16.083	12.003	121.822	0	121.822	2019-09-22
Dyke	2019-09-22 22:29:00	16.057	11.926	120.974	0	120.974	2019-09-22
Dyke	2019-09-22 22:39:00	15.964	12.237	123.884	0	123.884	2019-09-22
Dyke	2019-09-22 22:49:00	15.904	12.329	124.656	0	124.656	2019-09-22
Dyke	2019-09-22 22:59:00	15.844	12.301	124.214	0	124.214	2019-09-22
Dyke	2019-09-22 23:09:00	15.835	12.152	122.686	0	122.686	2019-09-22
Dyke	2019-09-22 23:19:00	15.707	12.145	122.282	0	122.282	2019-09-22
Dyke	2019-09-22 23:29:00	15.682	12.149	122.257	0	122.257	2019-09-22
Dyke	2019-09-22 23:39:00	15.622	12.151	122.12	0	122.12	2019-09-22
Dyke	2019-09-22 23:49:00	15.51	12.153	121.848	0	121.848	2019-09-22
Dyke	2019-09-22 23:59:00	15.433	12.116	121.277	0	121.277	2019-09-22
Dyke	2019-09-23 00:09:00	15.425	12.11	121.196	0	121.196	2019-09-23
Dyke	2019-09-23 00:19:00	15.373	12.068	120.642	0	120.642	2019-09-23
Dyke	2019-09-23 00:29:00	15.279	12.073	120.448	0	120.448	2019-09-23
Dyke	2019-09-23 00:39:00	15.279	12.182	121.536	0	121.536	2019-09-23
Dyke	2019-09-23 00:49:00	15.201	12.264	122.149	0	122.149	2019-09-23
Dyke	2019-09-23 00:59:00	15.133	12.424	123.561	0	123.561	2019-09-23
Dyke	2019-09-23 01:09:00	14.986	12.538	124.3	0	124.3	2019-09-23
Dyke	2019-09-23 01:19:00	14.917	12.574	124.472	0	124.472	2019-09-23
Dyke	2019-09-23 01:29:00	14.952	12.477	123.605	0	123.605	2019-09-23
Dyke	2019-09-23 01:39:00	14.9	12.433	123.031	0	123.031	2019-09-23
Dyke	2019-09-23 01:49:00	14.84	12.373	122.278	0	122.278	2019-09-23
Dyke	2019-09-23 01:59:00	14.771	12.247	120.852	0	120.852	2019-09-23
Dyke	2019-09-23 02:09:00	14.685	12.13	119.475	0	119.475	2019-09-23
Dyke	2019-09-23 02:19:00	14.685	11.83	116.52	0	116.52	2019-09-23
Dyke	2019-09-23 02:29:00	14.667	11.891	117.075	0	117.075	2019-09-23
Dyke	2019-09-23 02:39:00	14.615	11.867	116.707	0	116.707	2019-09-23
Dyke	2019-09-23 02:49:00	14.494	11.903	116.753	0	116.753	2019-09-23
Dyke	2019-09-23 02:59:00	14.538	11.834	116.187	0	116.187	2019-09-23
Dyke	2019-09-23 03:09:00	14.46	11.704	114.716	0	114.716	2019-09-23
Dyke	2019-09-23 03:19:00	14.425	11.598	113.59	0	113.59	2019-09-23
Dyke	2019-09-23 03:29:00	14.399	11.423	111.813	0	111.813	2019-09-23
Dyke	2019-09-23 03:39:00	14.373	11.299	110.537	0	110.537	2019-09-23
Dyke	2019-09-23 03:49:00	14.295	11.173	109.118	0	109.118	2019-09-23
Dyke	2019-09-23 03:59:00	14.243	10.898	106.311	0	106.311	2019-09-23
Dyke	2019-09-23 04:09:00	14.235	10.949	106.79	0	106.79	2019-09-23
Dyke	2019-09-23 04:19:00	14.148	11.077	107.833	0	107.833	2019-09-23
Dyke	2019-09-23 04:29:00	14.139	11.054	107.588	0	107.588	2019-09-23
Dyke	2019-09-23 04:39:00	14.078	11.042	107.327	0	107.327	2019-09-23
Dyke	2019-09-23 04:49:00	14.009	11.008	106.835	0	106.835	2019-09-23
Dyke	2019-09-23 04:59:00	14.044	10.919	106.053	0	106.053	2019-09-23
Dyke	2019-09-23 05:09:00	13.974	10.86	105.318	0	105.318	2019-09-23
Dyke	2019-09-23 05:19:00	13.931	10.835	104.976	0	104.976	2019-09-23
Dyke	2019-09-23 05:29:00	13.922	10.73	103.938	0	103.938	2019-09-23
Dyke	2019-09-23 05:39:00	13.939	10.562	102.349	0	102.349	2019-09-23
Dyke	2019-09-23 05:49:00	13.913	10.279	99.5497	0	99.5497	2019-09-23
Dyke	2019-09-23 05:59:00	13.931	10.048	97.351	0	97.351	2019-09-23
Dyke	2019-09-23 06:09:00	13.939	9.703	94.025	0	94.025	2019-09-23
Dyke	2019-09-23 06:19:00	13.87	9.554	92.4407	0	92.4407	2019-09-23
Dyke	2019-09-23 06:29:00	13.852	9.741	94.2127	0	94.2127	2019-09-23
Dyke	2019-09-23 06:39:00	13.861	9.644	93.293	0	93.293	2019-09-23
Dyke	2019-09-23 06:49:00	13.835	9.602	92.8336	0	92.8336	2019-09-23
Dyke	2019-09-23 06:59:00	13.861	9.415	91.0778	0	91.0778	2019-09-23
Dyke	2019-09-23 07:09:00	13.87	9.406	91.0087	0	91.0087	2019-09-23
Dyke	2019-09-23 07:19:00	13.844	9.281	89.7479	0	89.7479	2019-09-23
Dyke	2019-09-23 07:29:00	13.826	9.242	89.3353	0	89.3353	2019-09-23
Dyke	2019-09-23 07:39:00	13.861	9.267	89.6461	0	89.6461	2019-09-23
Dyke	2019-09-23 07:49:00	13.835	9.089	87.8738	0	87.8738	2019-09-23
Dyke	2019-09-23 07:59:00	13.835	8.921	86.2496	0	86.2496	2019-09-23
Dyke	2019-09-23 08:09:00	13.904	8.91	86.2742	0	86.2742	2019-09-23
Dyke	2019-09-23 08:19:00	13.948	9.056	87.7727	0	87.7727	2019-09-23
Dyke	2019-09-23 08:29:00	13.983	9.299	90.1973	0	90.1973	2019-09-23
Dyke	2019-09-23 08:39:00	13.87	9.786	94.6855	0	94.6855	2019-09-23
Dyke	2019-09-23 08:49:00	14.191	10.263	100.003	0	100.003	2019-09-23
Dyke	2019-09-23 08:59:00	14.339	10.332	101.002	0	101.002	2019-09-23
Dyke	2019-09-23 09:09:00	14.46	11.026	108.071	0	108.071	2019-09-23
Dyke	2019-09-23 09:19:00	14.624	11.165	109.824	0	109.824	2019-09-23
Dyke	2019-09-23 09:29:00	14.969	11.993	118.854	0	118.854	2019-09-23
Dyke	2019-09-23 09:39:00	15.219	12.518	124.727	0	124.727	2019-09-23
Dyke	2019-09-23 09:49:00	15.493	11.616	116.422	0	116.422	2019-09-23
Dyke	2019-09-23 09:59:00	15.707	11.661	117.409	0	117.409	2019-09-23
Dyke	2019-09-23 10:09:00	15.929	12.005	121.445	0	121.445	2019-09-23
Dyke	2019-09-23 10:19:00	16.092	12.153	123.368	0	123.368	2019-09-23
Dyke	2019-09-23 10:29:00	16.356	12.259	125.14	0	125.14	2019-09-23
Dyke	2019-09-23 10:39:00	16.611	12.391	127.169	0	127.169	2019-09-23
Dyke	2019-09-23 10:49:00	16.925	12.608	130.25	0	130.25	2019-09-23
Dyke	2019-09-23 10:59:00	17.247	12.879	133.945	0	133.945	2019-09-23
Dyke	2019-09-23 11:09:00	17.458	13.316	139.097	0	139.097	2019-09-23
Dyke	2019-09-23 11:19:00	17.543	13.581	142.115	0	142.115	2019-09-23
Dyke	2019-09-23 11:29:00	18.183	13.007	137.913	0	137.913	2019-09-23
Dyke	2019-09-23 11:39:00	18.251	12.934	137.329	0	137.329	2019-09-23
Dyke	2019-09-23 11:49:00	18.267	13.441	142.759	0	142.759	2019-09-23
Dyke	2019-09-23 11:59:00	18.343	13.217	140.598	0	140.598	2019-09-23
Dyke	2019-09-23 12:09:00	18.52	13.778	147.096	0	147.096	2019-09-23
Dyke	2019-09-23 12:19:00	18.629	14.326	153.285	0	153.285	2019-09-23
Dyke	2019-09-23 12:29:00	18.444	14.065	149.927	0	149.927	2019-09-23
Dyke	2019-09-23 12:39:00	18.746	13.954	149.66	0	149.66	2019-09-23
Dyke	2019-09-23 12:49:00	18.654	14.373	153.866	0	153.866	2019-09-23
Dyke	2019-09-23 12:59:00	18.595	14.054	150.271	0	150.271	2019-09-23
Dyke	2019-09-23 13:09:00	18.62	14.369	153.717	0	153.717	2019-09-23
Dyke	2019-09-23 13:19:00	18.578	14.222	152.015	0	152.015	2019-09-23
Dyke	2019-09-23 13:29:00	18.377	14.574	155.141	0	155.141	2019-09-23
Dyke	2019-09-23 13:39:00	18.36	14.643	155.822	0	155.822	2019-09-23
Dyke	2019-09-23 13:49:00	18.494	14.567	155.437	0	155.437	2019-09-23
Dyke	2019-09-23 13:59:00	18.755	14.647	157.121	0	157.121	2019-09-23
Dyke	2019-09-23 14:09:00	18.839	14.639	157.303	0	157.303	2019-09-23
Dyke	2019-09-23 14:19:00	19.141	14.95	161.627	0	161.627	2019-09-23
Dyke	2019-09-23 14:29:00	19.166	15.18	164.197	0	164.197	2019-09-23
Dyke	2019-09-23 14:39:00	19.166	14.589	157.804	0	157.804	2019-09-23
Dyke	2019-09-23 14:49:00	19.199	14.276	154.521	0	154.521	2019-09-23
Dyke	2019-09-23 14:59:00	19.258	14.816	160.556	0	160.556	2019-09-23
Dyke	2019-09-23 15:09:00	19.266	15.352	166.392	0	166.392	2019-09-23
Dyke	2019-09-23 15:19:00	19.149	15.585	168.52	0	168.52	2019-09-23
Dyke	2019-09-23 15:29:00	19.057	15.935	171.985	0	171.985	2019-09-23
Dyke	2019-09-23 15:39:00	18.914	16.553	178.14	0	178.14	2019-09-23
Dyke	2019-09-23 15:49:00	18.847	16.795	180.499	0	180.499	2019-09-23
Dyke	2019-09-23 15:59:00	18.738	16.761	179.737	0	179.737	2019-09-23
Dyke	2019-09-23 16:09:00	18.998	16.859	181.741	0	181.741	2019-09-23
Dyke	2019-09-23 16:19:00	18.99	16.798	181.054	0	181.054	2019-09-23
Dyke	2019-09-23 16:29:00	18.939	17.061	183.7	0	183.7	2019-09-23
Dyke	2019-09-23 16:39:00	18.956	16.961	182.686	0	182.686	2019-09-23
Dyke	2019-09-23 16:49:00	18.73	16.836	180.512	0	180.512	2019-09-23
Dyke	2019-09-23 16:59:00	18.494	17.309	184.695	0	184.695	2019-09-23
Dyke	2019-09-23 17:09:00	18.385	17.071	181.751	0	181.751	2019-09-23
Dyke	2019-09-23 17:19:00	18.259	16.837	178.8	0	178.8	2019-09-23
Dyke	2019-09-23 17:29:00	18.141	16.87	178.718	0	178.718	2019-09-23
Dyke	2019-09-23 17:39:00	17.973	16.953	178.98	0	178.98	2019-09-23
Dyke	2019-09-23 17:49:00	17.863	16.91	178.123	0	178.123	2019-09-23
Dyke	2019-09-23 17:59:00	17.787	16.807	176.761	0	176.761	2019-09-23
Dyke	2019-09-23 18:09:00	17.754	16.578	174.234	0	174.234	2019-09-23
Dyke	2019-09-23 18:19:00	17.635	16.418	172.129	0	172.129	2019-09-23
Dyke	2019-09-23 18:29:00	17.551	16.366	171.287	0	171.287	2019-09-23
Dyke	2019-09-23 18:39:00	17.365	16.159	168.47	0	168.47	2019-09-23
Dyke	2019-09-23 18:49:00	17.297	16.052	167.118	0	167.118	2019-09-23
Dyke	2019-09-23 18:59:00	17.23	15.881	165.108	0	165.108	2019-09-23
Dyke	2019-09-23 19:09:00	17.06	15.725	162.909	0	162.909	2019-09-23
Dyke	2019-09-23 19:19:00	16.993	15.499	160.343	0	160.343	2019-09-23
Dyke	2019-09-23 19:29:00	16.891	15.377	158.743	0	158.743	2019-09-23
Dyke	2019-09-23 19:39:00	16.832	15.173	156.443	0	156.443	2019-09-23
Dyke	2019-09-23 19:49:00	16.789	15.043	154.963	0	154.963	2019-09-23
Dyke	2019-09-23 19:59:00	16.687	14.885	153.008	0	153.008	2019-09-23
Dyke	2019-09-23 20:09:00	16.611	14.768	151.564	0	151.564	2019-09-23
Dyke	2019-09-23 20:19:00	16.56	14.67	150.397	0	150.397	2019-09-23
Dyke	2019-09-23 20:29:00	16.492	14.6	149.465	0	149.465	2019-09-23
Dyke	2019-09-23 20:39:00	16.407	14.544	148.625	0	148.625	2019-09-23
Dyke	2019-09-23 20:49:00	16.398	14.415	147.279	0	147.279	2019-09-23
Dyke	2019-09-23 20:59:00	16.339	14.29	145.821	0	145.821	2019-09-23
Dyke	2019-09-23 21:09:00	16.296	14.171	144.475	0	144.475	2019-09-23
Dyke	2019-09-23 21:19:00	16.237	14.016	142.717	0	142.717	2019-09-23
Dyke	2019-09-23 21:29:00	16.202	13.884	141.268	0	141.268	2019-09-23
Dyke	2019-09-23 21:39:00	16.177	13.744	139.77	0	139.77	2019-09-23
Dyke	2019-09-23 21:49:00	16.1	13.646	138.547	0	138.547	2019-09-23
Dyke	2019-09-23 21:59:00	16.015	13.533	137.152	0	137.152	2019-09-23
Dyke	2019-09-23 22:09:00	16.023	13.455	136.385	0	136.385	2019-09-23
Dyke	2019-09-23 22:19:00	15.981	13.353	135.231	0	135.231	2019-09-23
Dyke	2019-09-23 22:29:00	15.921	13.263	134.148	0	134.148	2019-09-23
Dyke	2019-09-23 22:39:00	15.887	13.14	132.808	0	132.808	2019-09-23
Dyke	2019-09-23 22:49:00	15.921	13.001	131.498	0	131.498	2019-09-23
Dyke	2019-09-23 22:59:00	15.835	12.997	131.217	0	131.217	2019-09-23
Dyke	2019-09-23 23:09:00	15.818	12.933	130.524	0	130.524	2019-09-23
Dyke	2019-09-23 23:19:00	15.818	12.857	129.757	0	129.757	2019-09-23
Dyke	2019-09-23 23:29:00	15.784	12.766	128.745	0	128.745	2019-09-23
Dyke	2019-09-23 23:39:00	15.759	12.591	126.913	0	126.913	2019-09-23
Dyke	2019-09-23 23:49:00	15.733	12.499	125.916	0	125.916	2019-09-23
Dyke	2019-09-23 23:59:00	15.724	12.379	124.683	0	124.683	2019-09-23
Dyke	2019-09-24 00:09:00	15.673	12.252	123.27	0	123.27	2019-09-24
Dyke	2019-09-24 00:19:00	15.673	11.949	120.221	0	120.221	2019-09-24
Dyke	2019-09-24 00:29:00	15.613	11.859	119.163	0	119.163	2019-09-24
Dyke	2019-09-24 00:39:00	15.656	11.878	119.463	0	119.463	2019-09-24
Dyke	2019-09-24 00:49:00	15.579	12.002	120.512	0	120.512	2019-09-24
Dyke	2019-09-24 00:59:00	15.545	11.931	119.712	0	119.712	2019-09-24
Dyke	2019-09-24 01:09:00	15.545	11.713	117.525	0	117.525	2019-09-24
Dyke	2019-09-24 01:19:00	15.587	11.603	116.526	0	116.526	2019-09-24
Dyke	2019-09-24 01:29:00	15.536	11.474	115.105	0	115.105	2019-09-24
Dyke	2019-09-24 01:39:00	15.476	11.531	115.528	0	115.528	2019-09-24
Dyke	2019-09-24 01:49:00	15.519	11.374	114.06	0	114.06	2019-09-24
Dyke	2019-09-24 01:59:00	15.493	11.351	113.766	0	113.766	2019-09-24
Dyke	2019-09-24 02:09:00	15.425	11.341	113.5	0	113.5	2019-09-24
Dyke	2019-09-24 02:19:00	15.442	11.273	112.861	0	112.861	2019-09-24
Dyke	2019-09-24 02:29:00	15.425	11.194	112.029	0	112.029	2019-09-24
Dyke	2019-09-24 02:39:00	15.399	11.132	111.347	0	111.347	2019-09-24
Dyke	2019-09-24 02:49:00	15.416	11.064	110.707	0	110.707	2019-09-24
Dyke	2019-09-24 02:59:00	15.39	10.994	109.945	0	109.945	2019-09-24
Dyke	2019-09-24 03:09:00	15.39	10.929	109.295	0	109.295	2019-09-24
Dyke	2019-09-24 03:19:00	15.399	10.919	109.216	0	109.216	2019-09-24
Dyke	2019-09-24 03:29:00	15.365	10.768	107.627	0	107.627	2019-09-24
Dyke	2019-09-24 03:39:00	15.339	10.769	107.577	0	107.577	2019-09-24
Dyke	2019-09-24 03:49:00	15.382	10.833	108.316	0	108.316	2019-09-24
Dyke	2019-09-24 03:59:00	15.433	10.813	108.235	0	108.235	2019-09-24
Dyke	2019-09-24 04:09:00	15.433	10.792	108.024	0	108.024	2019-09-24
Dyke	2019-09-24 04:19:00	15.39	10.712	107.125	0	107.125	2019-09-24
Dyke	2019-09-24 04:29:00	15.39	10.631	106.315	0	106.315	2019-09-24
Dyke	2019-09-24 04:39:00	15.373	10.639	106.356	0	106.356	2019-09-24
Dyke	2019-09-24 04:49:00	15.339	10.439	104.281	0	104.281	2019-09-24
Dyke	2019-09-24 04:59:00	15.33	10.364	103.511	0	103.511	2019-09-24
Dyke	2019-09-24 05:09:00	15.313	10.315	102.984	0	102.984	2019-09-24
Dyke	2019-09-24 05:19:00	15.382	10.226	102.247	0	102.247	2019-09-24
Dyke	2019-09-24 05:29:00	15.365	10.192	101.87	0	101.87	2019-09-24
Dyke	2019-09-24 05:39:00	15.407	10.029	100.331	0	100.331	2019-09-24
Dyke	2019-09-24 05:49:00	15.347	9.916	99.0731	0	99.0731	2019-09-24
Dyke	2019-09-24 05:59:00	15.373	9.798	97.9487	0	97.9487	2019-09-24
Dyke	2019-09-24 06:09:00	15.382	9.736	97.3477	0	97.3477	2019-09-24
Dyke	2019-09-24 06:19:00	15.382	9.691	96.8978	0	96.8978	2019-09-24
Dyke	2019-09-24 06:29:00	15.425	9.636	96.4367	0	96.4367	2019-09-24
Dyke	2019-09-24 06:39:00	15.476	9.622	96.4019	0	96.4019	2019-09-24
Dyke	2019-09-24 06:49:00	15.382	9.673	96.7178	0	96.7178	2019-09-24
Dyke	2019-09-24 06:59:00	15.416	9.532	95.3775	0	95.3775	2019-09-24
Dyke	2019-09-24 07:09:00	15.347	9.397	93.8876	0	93.8876	2019-09-24
Dyke	2019-09-24 07:19:00	15.365	9.376	93.714	0	93.714	2019-09-24
Dyke	2019-09-24 07:29:00	15.433	9.354	93.6305	0	93.6305	2019-09-24
Dyke	2019-09-24 07:39:00	15.433	9.365	93.7406	0	93.7406	2019-09-24
Dyke	2019-09-24 07:49:00	15.459	9.359	93.7328	0	93.7328	2019-09-24
Dyke	2019-09-24 07:59:00	15.407	9.367	93.7084	0	93.7084	2019-09-24
Dyke	2019-09-24 08:09:00	15.485	9.351	93.7048	0	93.7048	2019-09-24
Dyke	2019-09-24 08:19:00	15.476	9.262	92.7951	0	92.7951	2019-09-24
Dyke	2019-09-24 08:29:00	15.45	9.228	92.403	0	92.403	2019-09-24
Dyke	2019-09-24 08:39:00	15.485	9.255	92.7428	0	92.7428	2019-09-24
Dyke	2019-09-24 08:49:00	15.545	9.277	93.0827	0	93.0827	2019-09-24
Dyke	2019-09-24 08:59:00	15.519	9.291	93.1713	0	93.1713	2019-09-24
Dyke	2019-09-24 09:09:00	15.622	9.253	92.9948	0	92.9948	2019-09-24
Dyke	2019-09-24 09:19:00	15.553	9.349	93.8212	0	93.8212	2019-09-24
Dyke	2019-09-24 09:29:00	15.647	9.525	95.7796	0	95.7796	2019-09-24
Dyke	2019-09-24 09:39:00	15.587	9.412	94.5221	0	94.5221	2019-09-24
Dyke	2019-09-24 09:49:00	15.57	9.448	94.8491	0	94.8491	2019-09-24
Dyke	2019-09-24 09:59:00	15.63	9.304	93.5233	0	93.5233	2019-09-24
Dyke	2019-09-24 10:09:00	15.724	9.425	94.9298	0	94.9298	2019-09-24
Dyke	2019-09-24 10:19:00	15.767	9.525	96.025	0	96.025	2019-09-24
Dyke	2019-09-24 10:29:00	15.741	10.153	102.299	0	102.299	2019-09-24
Dyke	2019-09-24 10:39:00	15.733	10.135	102.101	0	102.101	2019-09-24
Dyke	2019-09-24 10:49:00	15.759	9.947	100.262	0	100.262	2019-09-24
Dyke	2019-09-24 10:59:00	15.793	9.945	100.315	0	100.315	2019-09-24
Dyke	2019-09-24 11:09:00	15.878	10.152	102.588	0	102.588	2019-09-24
Dyke	2019-09-24 11:19:00	15.835	10.438	105.382	0	105.382	2019-09-24
Dyke	2019-09-24 11:29:00	15.921	10.774	108.973	0	108.973	2019-09-24
Dyke	2019-09-24 11:39:00	15.878	10.675	107.873	0	107.873	2019-09-24
Dyke	2019-09-24 11:49:00	15.827	10.508	106.07	0	106.07	2019-09-24
Dyke	2019-09-24 11:59:00	15.938	10.547	106.716	0	106.716	2019-09-24
Dyke	2019-09-24 12:09:00	15.938	10.782	109.093	0	109.093	2019-09-24
Dyke	2019-09-24 12:19:00	16.015	10.427	105.674	0	105.674	2019-09-24
Dyke	2019-09-24 12:29:00	15.912	10.527	106.455	0	106.455	2019-09-24
Dyke	2019-09-24 12:39:00	16.134	10.521	106.896	0	106.896	2019-09-24
Dyke	2019-09-24 12:49:00	16.364	10.763	109.888	0	109.888	2019-09-24
Dyke	2019-09-24 12:59:00	16.534	11.004	112.751	0	112.751	2019-09-24
Dyke	2019-09-24 13:09:00	16.645	11.649	119.639	0	119.639	2019-09-24
Dyke	2019-09-24 13:19:00	16.713	12.328	126.793	0	126.793	2019-09-24
Dyke	2019-09-24 13:29:00	16.73	12.196	125.48	0	125.48	2019-09-24
Dyke	2019-09-24 13:39:00	16.73	11.732	120.706	0	120.706	2019-09-24
Dyke	2019-09-24 13:49:00	16.908	11.877	122.654	0	122.654	2019-09-24
Dyke	2019-09-24 13:59:00	16.942	11.892	122.896	0	122.896	2019-09-24
Dyke	2019-09-24 14:09:00	16.984	12.267	126.883	0	126.883	2019-09-24
Dyke	2019-09-24 14:19:00	17.069	13.141	136.164	0	136.164	2019-09-24
Dyke	2019-09-24 14:29:00	17.154	13.343	138.503	0	138.503	2019-09-24
Dyke	2019-09-24 14:39:00	17.255	13.882	144.4	0	144.4	2019-09-24
Dyke	2019-09-24 14:49:00	17.289	14.39	149.79	0	149.79	2019-09-24
Dyke	2019-09-24 14:59:00	17.483	14.376	150.248	0	150.248	2019-09-24
Dyke	2019-09-24 15:09:00	17.509	13.169	137.707	0	137.707	2019-09-24
Dyke	2019-09-24 15:19:00	17.475	13.084	136.722	0	136.722	2019-09-24
Dyke	2019-09-24 15:29:00	17.475	13.601	142.125	0	142.125	2019-09-24
Dyke	2019-09-24 15:39:00	17.517	14.043	146.871	0	146.871	2019-09-24
Dyke	2019-09-24 15:49:00	17.627	13.785	144.501	0	144.501	2019-09-24
Dyke	2019-09-24 15:59:00	17.635	13.956	146.317	0	146.317	2019-09-24
Dyke	2019-09-24 16:09:00	17.543	15.049	157.477	0	157.477	2019-09-24
Dyke	2019-09-24 16:19:00	17.551	15.116	158.204	0	158.204	2019-09-24
Dyke	2019-09-24 16:29:00	17.602	14.234	149.13	0	149.13	2019-09-24
Dyke	2019-09-24 16:39:00	17.5	14.223	148.701	0	148.701	2019-09-24
Dyke	2019-09-24 16:49:00	17.433	14.471	151.084	0	151.084	2019-09-24
Dyke	2019-09-24 16:59:00	17.357	15.048	156.861	0	156.861	2019-09-24
Dyke	2019-09-24 17:09:00	17.348	15.461	161.136	0	161.136	2019-09-24
Dyke	2019-09-24 17:19:00	17.204	15.406	160.083	0	160.083	2019-09-24
Dyke	2019-09-24 17:29:00	17.145	15.187	157.614	0	157.614	2019-09-24
Dyke	2019-09-24 17:39:00	17.145	14.846	154.075	0	154.075	2019-09-24
Dyke	2019-09-24 17:49:00	16.984	14.847	153.569	0	153.569	2019-09-24
Dyke	2019-09-24 17:59:00	16.976	14.558	150.555	0	150.555	2019-09-24
Dyke	2019-09-24 18:09:00	16.908	14.013	144.713	0	144.713	2019-09-24
Dyke	2019-09-24 18:19:00	16.908	13.53	139.725	0	139.725	2019-09-24
Dyke	2019-09-24 18:29:00	16.849	13.276	136.933	0	136.933	2019-09-24
Dyke	2019-09-24 18:39:00	16.823	13.154	135.601	0	135.601	2019-09-24
Dyke	2019-09-24 18:49:00	16.764	13.236	136.277	0	136.277	2019-09-24
Dyke	2019-09-24 18:59:00	16.713	13.288	136.667	0	136.667	2019-09-24
Dyke	2019-09-24 19:09:00	16.636	13.319	136.764	0	136.764	2019-09-24
Dyke	2019-09-24 19:19:00	16.619	13.375	137.29	0	137.29	2019-09-24
Dyke	2019-09-24 19:29:00	16.509	13.343	136.646	0	136.646	2019-09-24
Dyke	2019-09-24 19:39:00	16.475	13.291	136.016	0	136.016	2019-09-24
Dyke	2019-09-24 19:49:00	16.407	13.371	136.639	0	136.639	2019-09-24
Dyke	2019-09-24 19:59:00	16.33	13.274	135.427	0	135.427	2019-09-24
Dyke	2019-09-24 20:09:00	16.305	13.045	133.021	0	133.021	2019-09-24
Dyke	2019-09-24 20:19:00	16.194	12.918	131.417	0	131.417	2019-09-24
Dyke	2019-09-24 20:29:00	16.16	12.83	130.428	0	130.428	2019-09-24
Dyke	2019-09-24 20:39:00	16.092	12.748	129.408	0	129.408	2019-09-24
Dyke	2019-09-24 20:49:00	15.955	12.64	127.939	0	127.939	2019-09-24
Dyke	2019-09-24 20:59:00	15.878	12.461	125.921	0	125.921	2019-09-24
Dyke	2019-09-24 21:09:00	15.818	12.234	123.469	0	123.469	2019-09-24
Dyke	2019-09-24 21:19:00	15.801	12.073	121.801	0	121.801	2019-09-24
Dyke	2019-09-24 21:29:00	15.741	11.948	120.385	0	120.385	2019-09-24
Dyke	2019-09-24 21:39:00	15.682	11.544	116.169	0	116.169	2019-09-24
Dyke	2019-09-24 21:49:00	15.682	11.722	117.96	0	117.96	2019-09-24
Dyke	2019-09-24 21:59:00	15.699	11.8	118.788	0	118.788	2019-09-24
Dyke	2019-09-24 22:09:00	15.605	11.859	119.142	0	119.142	2019-09-24
Dyke	2019-09-24 22:19:00	15.63	11.631	116.914	0	116.914	2019-09-24
Dyke	2019-09-24 22:29:00	15.664	11.428	114.957	0	114.957	2019-09-24
Dyke	2019-09-24 22:39:00	15.562	11.127	111.686	0	111.686	2019-09-24
Dyke	2019-09-24 22:49:00	15.527	11.015	110.479	0	110.479	2019-09-24
Dyke	2019-09-24 22:59:00	15.605	10.904	109.548	0	109.548	2019-09-24
Dyke	2019-09-24 23:09:00	15.553	11.07	111.092	0	111.092	2019-09-24
Dyke	2019-09-24 23:19:00	15.707	11.263	113.401	0	113.401	2019-09-24
Dyke	2019-09-24 23:29:00	15.664	11.407	114.746	0	114.746	2019-09-24
Dyke	2019-09-24 23:39:00	15.673	11.41	114.798	0	114.798	2019-09-24
Dyke	2019-09-24 23:49:00	15.622	11.358	114.151	0	114.151	2019-09-24
Dyke	2019-09-24 23:59:00	15.596	11.048	110.973	0	110.973	2019-09-24
Dyke	2019-09-25 00:09:00	15.57	11.12	111.634	0	111.634	2019-09-25
Dyke	2019-09-25 00:19:00	15.51	11.042	110.709	0	110.709	2019-09-25
Dyke	2019-09-25 00:29:00	15.476	10.874	108.946	0	108.946	2019-09-25
Dyke	2019-09-25 00:39:00	15.425	10.595	106.034	0	106.034	2019-09-25
Dyke	2019-09-25 00:49:00	15.373	10.527	105.236	0	105.236	2019-09-25
Dyke	2019-09-25 00:59:00	15.373	10.29	102.867	0	102.867	2019-09-25
Dyke	2019-09-25 01:09:00	15.347	10.279	102.7	0	102.7	2019-09-25
Dyke	2019-09-25 01:19:00	15.407	10.506	105.103	0	105.103	2019-09-25
Dyke	2019-09-25 01:29:00	15.382	10.603	106.017	0	106.017	2019-09-25
Dyke	2019-09-25 01:39:00	15.322	10.644	106.29	0	106.29	2019-09-25
Dyke	2019-09-25 01:49:00	15.373	10.382	103.787	0	103.787	2019-09-25
Dyke	2019-09-25 01:59:00	15.322	10.473	104.582	0	104.582	2019-09-25
Dyke	2019-09-25 02:09:00	15.373	10.439	104.357	0	104.357	2019-09-25
Dyke	2019-09-25 02:19:00	15.27	10.273	102.47	0	102.47	2019-09-25
Dyke	2019-09-25 02:29:00	15.296	10.09	100.701	0	100.701	2019-09-25
Dyke	2019-09-25 02:39:00	15.313	10.045	100.289	0	100.289	2019-09-25
Dyke	2019-09-25 02:49:00	15.244	10.11	100.788	0	100.788	2019-09-25
Dyke	2019-09-25 02:59:00	15.339	10.173	101.623	0	101.623	2019-09-25
Dyke	2019-09-25 03:09:00	15.296	10.392	103.715	0	103.715	2019-09-25
Dyke	2019-09-25 03:19:00	15.21	10.41	103.703	0	103.703	2019-09-25
Dyke	2019-09-25 03:29:00	15.244	10.33	102.981	0	102.981	2019-09-25
Dyke	2019-09-25 03:39:00	15.244	10.198	101.665	0	101.665	2019-09-25
Dyke	2019-09-25 03:49:00	15.167	10.005	99.5763	0	99.5763	2019-09-25
Dyke	2019-09-25 03:59:00	15.176	9.987	99.4165	0	99.4165	2019-09-25
Dyke	2019-09-25 04:09:00	15.141	9.706	96.5464	0	96.5464	2019-09-25
Dyke	2019-09-25 04:19:00	15.09	9.359	92.9926	0	92.9926	2019-09-25
Dyke	2019-09-25 04:29:00	15.167	8.399	83.5924	0	83.5924	2019-09-25
Dyke	2019-09-25 04:39:00	15.09	9.001	89.4354	0	89.4354	2019-09-25
Dyke	2019-09-25 04:49:00	15.064	9.022	89.5938	0	89.5938	2019-09-25
Dyke	2019-09-25 04:59:00	14.978	9.048	89.6855	0	89.6855	2019-09-25
Dyke	2019-09-25 05:09:00	14.978	9.343	92.6095	0	92.6095	2019-09-25
Dyke	2019-09-25 05:19:00	14.909	9.444	93.4712	0	93.4712	2019-09-25
Dyke	2019-09-25 05:29:00	14.995	9.466	93.8632	0	93.8632	2019-09-25
Dyke	2019-09-25 05:39:00	14.943	9.325	92.3613	0	92.3613	2019-09-25
Dyke	2019-09-25 05:49:00	14.866	9.29	91.8615	0	91.8615	2019-09-25
Dyke	2019-09-25 05:59:00	14.935	9.257	91.6719	0	91.6719	2019-09-25
Dyke	2019-09-25 06:09:00	14.892	9.195	90.9733	0	90.9733	2019-09-25
Dyke	2019-09-25 06:19:00	14.9	9.007	89.1287	0	89.1287	2019-09-25
Dyke	2019-09-25 06:29:00	14.909	8.878	87.8693	0	87.8693	2019-09-25
Dyke	2019-09-25 06:39:00	14.917	8.646	85.5879	0	85.5879	2019-09-25
Dyke	2019-09-25 06:49:00	14.917	8.504	84.1822	0	84.1822	2019-09-25
Dyke	2019-09-25 06:59:00	14.943	8.43	83.4966	0	83.4966	2019-09-25
Dyke	2019-09-25 07:09:00	14.935	8.323	82.4225	0	82.4225	2019-09-25
Dyke	2019-09-25 07:19:00	14.952	8.183	81.0659	0	81.0659	2019-09-25
Dyke	2019-09-25 07:29:00	14.926	7.981	79.0203	0	79.0203	2019-09-25
Dyke	2019-09-25 07:39:00	14.866	8.049	79.5903	0	79.5903	2019-09-25
Dyke	2019-09-25 07:49:00	14.926	7.927	78.4857	0	78.4857	2019-09-25
Dyke	2019-09-25 07:59:00	14.986	7.842	77.7448	0	77.7448	2019-09-25
Dyke	2019-09-25 08:09:00	14.935	7.855	77.7879	0	77.7879	2019-09-25
Dyke	2019-09-25 08:19:00	14.995	7.986	79.1878	0	79.1878	2019-09-25
Dyke	2019-09-25 08:29:00	14.943	7.8	77.2566	0	77.2566	2019-09-25
Dyke	2019-09-25 08:39:00	14.909	7.819	77.3879	0	77.3879	2019-09-25
Dyke	2019-09-25 08:49:00	14.943	8.06	79.8318	0	79.8318	2019-09-25
Dyke	2019-09-25 08:59:00	14.917	8.166	80.8363	0	80.8363	2019-09-25
Dyke	2019-09-25 09:09:00	14.961	8.211	81.3591	0	81.3591	2019-09-25
Dyke	2019-09-25 09:19:00	15.055	8.224	81.6534	0	81.6534	2019-09-25
Dyke	2019-09-25 09:29:00	14.986	8.179	81.0858	0	81.0858	2019-09-25
Dyke	2019-09-25 09:39:00	15.021	8.224	81.5935	0	81.5935	2019-09-25
Dyke	2019-09-25 09:49:00	15.021	8.361	82.9527	0	82.9527	2019-09-25
Dyke	2019-09-25 09:59:00	15.047	8.524	84.6174	0	84.6174	2019-09-25
Dyke	2019-09-25 10:09:00	15.072	8.717	86.5799	0	86.5799	2019-09-25
Dyke	2019-09-25 10:19:00	15.047	8.984	89.1838	0	89.1838	2019-09-25
Dyke	2019-09-25 10:29:00	15.047	9.147	90.8019	0	90.8019	2019-09-25
Dyke	2019-09-25 10:39:00	15.115	9.058	90.0503	0	90.0503	2019-09-25
Dyke	2019-09-25 10:49:00	15.124	8.311	82.64	0	82.64	2019-09-25
Dyke	2019-09-25 10:59:00	15.201	7.998	79.6596	0	79.6596	2019-09-25
Dyke	2019-09-25 11:09:00	15.176	8.193	81.5579	0	81.5579	2019-09-25
Dyke	2019-09-25 11:19:00	15.21	8.229	81.9762	0	81.9762	2019-09-25
Dyke	2019-09-25 11:29:00	15.227	7.462	74.3627	0	74.3627	2019-09-25
Dyke	2019-09-25 11:39:00	15.219	7.173	71.4703	0	71.4703	2019-09-25
Dyke	2019-09-25 11:49:00	15.184	6.945	69.1465	0	69.1465	2019-09-25
Dyke	2019-09-25 11:59:00	15.184	6.83	68.0015	0	68.0015	2019-09-25
Dyke	2019-09-25 12:09:00	15.219	6.8	67.7538	0	67.7538	2019-09-25
Dyke	2019-09-25 12:19:00	15.184	6.933	69.027	0	69.027	2019-09-25
Dyke	2019-09-25 12:29:00	15.184	7.011	69.8036	0	69.8036	2019-09-25
Dyke	2019-09-25 12:39:00	15.15	7.073	70.3694	0	70.3694	2019-09-25
Dyke	2019-09-25 12:49:00	15.21	7.102	70.7492	0	70.7492	2019-09-25
Dyke	2019-09-25 12:59:00	15.167	7.143	71.0918	0	71.0918	2019-09-25
Dyke	2019-09-25 13:09:00	15.244	7.158	71.3592	0	71.3592	2019-09-25
Dyke	2019-09-25 13:19:00	15.193	7.152	71.2213	0	71.2213	2019-09-25
Dyke	2019-09-25 13:29:00	15.253	7.166	71.4528	0	71.4528	2019-09-25
Dyke	2019-09-25 13:39:00	15.296	7.186	71.7185	0	71.7185	2019-09-25
Dyke	2019-09-25 13:49:00	15.244	7.183	71.6085	0	71.6085	2019-09-25
Dyke	2019-09-25 13:59:00	15.253	7.198	71.7719	0	71.7719	2019-09-25
Dyke	2019-09-25 14:09:00	15.322	7.161	71.5089	0	71.5089	2019-09-25
Dyke	2019-09-25 14:19:00	15.322	7.148	71.379	0	71.379	2019-09-25
Dyke	2019-09-25 14:29:00	15.287	7.121	71.056	0	71.056	2019-09-25
Dyke	2019-09-25 14:39:00	15.322	7.085	70.7499	0	70.7499	2019-09-25
Dyke	2019-09-25 14:49:00	15.287	7.075	70.597	0	70.597	2019-09-25
Dyke	2019-09-25 14:59:00	15.339	7.027	70.1964	0	70.1964	2019-09-25
Dyke	2019-09-25 15:09:00	15.313	6.98	69.6879	0	69.6879	2019-09-25
Dyke	2019-09-25 15:19:00	15.382	6.989	69.8812	0	69.8812	2019-09-25
Dyke	2019-09-25 15:29:00	15.373	7.05	70.4775	0	70.4775	2019-09-25
Dyke	2019-09-25 15:39:00	15.373	7.074	70.7174	0	70.7174	2019-09-25
Dyke	2019-09-25 15:49:00	15.407	7.048	70.5089	0	70.5089	2019-09-25
Dyke	2019-09-25 15:59:00	15.382	7.054	70.5311	0	70.5311	2019-09-25
Dyke	2019-09-25 16:09:00	15.416	7.024	70.2824	0	70.2824	2019-09-25
Dyke	2019-09-25 16:19:00	15.425	7.018	70.2359	0	70.2359	2019-09-25
Dyke	2019-09-25 16:29:00	15.382	7.005	70.0412	0	70.0412	2019-09-25
Dyke	2019-09-25 16:39:00	15.399	7.025	70.2668	0	70.2668	2019-09-25
Dyke	2019-09-25 16:49:00	15.39	7.027	70.2732	0	70.2732	2019-09-25
Dyke	2019-09-25 16:59:00	15.356	6.998	69.9322	0	69.9322	2019-09-25
Dyke	2019-09-25 17:09:00	15.356	6.923	69.1827	0	69.1827	2019-09-25
Dyke	2019-09-25 17:19:00	15.382	6.864	68.6314	0	68.6314	2019-09-25
Dyke	2019-09-25 17:29:00	15.339	6.888	68.8078	0	68.8078	2019-09-25
Dyke	2019-09-25 17:39:00	15.407	6.923	69.2584	0	69.2584	2019-09-25
Dyke	2019-09-25 17:49:00	15.425	6.995	70.0057	0	70.0057	2019-09-25
Dyke	2019-09-25 17:59:00	15.339	7.03	70.2263	0	70.2263	2019-09-25
Dyke	2019-09-25 18:09:00	15.39	6.956	69.5632	0	69.5632	2019-09-25
Dyke	2019-09-25 18:19:00	15.373	7.033	70.3076	0	70.3076	2019-09-25
Dyke	2019-09-25 18:29:00	15.33	7	69.9131	0	69.9131	2019-09-25
Dyke	2019-09-25 18:39:00	15.356	6.856	68.5131	0	68.5131	2019-09-25
Dyke	2019-09-25 18:49:00	15.399	6.774	67.7562	0	67.7562	2019-09-25
Dyke	2019-09-25 18:59:00	15.39	6.779	67.7931	0	67.7931	2019-09-25
Dyke	2019-09-25 19:09:00	15.365	6.805	68.0166	0	68.0166	2019-09-25
Dyke	2019-09-25 19:19:00	15.356	6.805	68.0035	0	68.0035	2019-09-25
Dyke	2019-09-25 19:29:00	15.416	6.767	67.7108	0	67.7108	2019-09-25
Dyke	2019-09-25 19:39:00	15.425	6.766	67.7139	0	67.7139	2019-09-25
Dyke	2019-09-25 19:49:00	15.39	6.756	67.5631	0	67.5631	2019-09-25
Dyke	2019-09-25 19:59:00	15.416	6.726	67.3006	0	67.3006	2019-09-25
Dyke	2019-09-25 20:09:00	15.39	6.719	67.1931	0	67.1931	2019-09-25
Dyke	2019-09-25 20:19:00	15.407	6.711	67.1375	0	67.1375	2019-09-25
Dyke	2019-09-25 20:29:00	15.433	6.655	66.6144	0	66.6144	2019-09-25
Dyke	2019-09-25 20:39:00	15.433	6.623	66.2941	0	66.2941	2019-09-25
Dyke	2019-09-25 20:49:00	15.467	6.57	65.8115	0	65.8115	2019-09-25
Dyke	2019-09-25 20:59:00	15.519	6.556	65.7444	0	65.7444	2019-09-25
Dyke	2019-09-25 21:09:00	15.459	5.706	57.147	0	57.147	2019-09-25
Dyke	2019-09-25 21:19:00	15.459	6.052	60.6123	0	60.6123	2019-09-25
Dyke	2019-09-25 21:29:00	15.467	5.828	58.3789	0	58.3789	2019-09-25
Dyke	2019-09-25 21:39:00	15.459	5.712	57.2071	0	57.2071	2019-09-25
Dyke	2019-09-25 21:49:00	15.459	5.877	58.8596	0	58.8596	2019-09-25
Dyke	2019-09-25 21:59:00	15.51	5.979	59.9466	0	59.9466	2019-09-25
Dyke	2019-09-25 22:09:00	15.519	6.088	61.0512	0	61.0512	2019-09-25
Dyke	2019-09-25 22:19:00	15.51	6.222	62.383	0	62.383	2019-09-25
Dyke	2019-09-25 22:29:00	15.476	7.492	75.0616	0	75.0616	2019-09-25
Dyke	2019-09-25 22:39:00	15.45	7.958	79.686	0	79.686	2019-09-25
Dyke	2019-09-25 22:49:00	15.373	8.045	80.4243	0	80.4243	2019-09-25
Dyke	2019-09-25 22:59:00	15.39	8.149	81.4937	0	81.4937	2019-09-25
Dyke	2019-09-25 23:09:00	15.347	8.17	81.6284	0	81.6284	2019-09-25
Dyke	2019-09-25 23:19:00	15.296	8.241	82.2477	0	82.2477	2019-09-25
Dyke	2019-09-25 23:29:00	15.27	8.277	82.5608	0	82.5608	2019-09-25
Dyke	2019-09-25 23:39:00	15.27	8.271	82.501	0	82.501	2019-09-25
Dyke	2019-09-25 23:49:00	15.227	8.228	81.9962	0	81.9962	2019-09-25
Dyke	2019-09-25 23:59:00	15.176	8.213	81.757	0	81.757	2019-09-25
Dyke	2019-09-26 00:09:00	15.141	8.241	81.974	0	81.974	2019-09-26
Dyke	2019-09-26 00:19:00	15.055	8.259	82.0009	0	82.0009	2019-09-26
Dyke	2019-09-26 00:29:00	15.055	8.182	81.2364	0	81.2364	2019-09-26
Dyke	2019-09-26 00:39:00	14.978	8.181	81.0916	0	81.0916	2019-09-26
Dyke	2019-09-26 00:49:00	15.012	8.14	80.7444	0	80.7444	2019-09-26
Dyke	2019-09-26 00:59:00	15.004	8.093	80.2644	0	80.2644	2019-09-26
Dyke	2019-09-26 01:09:00	14.978	8.051	79.803	0	79.803	2019-09-26
Dyke	2019-09-26 01:19:00	14.874	8.023	79.3469	0	79.3469	2019-09-26
Dyke	2019-09-26 01:29:00	14.943	7.983	79.0692	0	79.0692	2019-09-26
Dyke	2019-09-26 01:39:00	14.943	7.901	78.257	0	78.257	2019-09-26
Dyke	2019-09-26 01:49:00	14.943	7.846	77.7122	0	77.7122	2019-09-26
Dyke	2019-09-26 01:59:00	14.917	7.785	77.0647	0	77.0647	2019-09-26
Dyke	2019-09-26 02:09:00	14.866	7.747	76.604	0	76.604	2019-09-26
Dyke	2019-09-26 02:19:00	14.857	7.675	75.8773	0	75.8773	2019-09-26
Dyke	2019-09-26 02:29:00	14.866	7.625	75.3977	0	75.3977	2019-09-26
Dyke	2019-09-26 02:39:00	14.814	7.579	74.8585	0	74.8585	2019-09-26
Dyke	2019-09-26 02:49:00	14.823	7.504	74.1322	0	74.1322	2019-09-26
Dyke	2019-09-26 02:59:00	14.788	7.43	73.3455	0	73.3455	2019-09-26
Dyke	2019-09-26 03:09:00	14.857	7.327	72.4369	0	72.4369	2019-09-26
Dyke	2019-09-26 03:19:00	14.762	7.304	72.0611	0	72.0611	2019-09-26
Dyke	2019-09-26 03:29:00	14.78	7.219	71.2502	0	71.2502	2019-09-26
Dyke	2019-09-26 03:39:00	14.823	7.143	70.5658	0	70.5658	2019-09-26
Dyke	2019-09-26 03:49:00	14.771	7.089	69.9535	0	69.9535	2019-09-26
Dyke	2019-09-26 03:59:00	14.788	7.03	69.3969	0	69.3969	2019-09-26
Dyke	2019-09-26 04:09:00	14.736	6.918	68.2143	0	68.2143	2019-09-26
Dyke	2019-09-26 04:19:00	14.745	6.852	67.5767	0	67.5767	2019-09-26
Dyke	2019-09-26 04:29:00	14.762	6.81	67.1873	0	67.1873	2019-09-26
Dyke	2019-09-26 04:39:00	14.754	6.685	65.9426	0	65.9426	2019-09-26
Dyke	2019-09-26 04:49:00	14.745	6.602	65.1111	0	65.1111	2019-09-26
Dyke	2019-09-26 04:59:00	14.728	6.547	64.5449	0	64.5449	2019-09-26
Dyke	2019-09-26 05:09:00	14.78	6.522	64.371	0	64.371	2019-09-26
Dyke	2019-09-26 05:19:00	14.805	6.473	63.922	0	63.922	2019-09-26
Dyke	2019-09-26 05:29:00	14.754	6.427	63.3976	0	63.3976	2019-09-26
Dyke	2019-09-26 05:39:00	14.659	6.369	62.6961	0	62.6961	2019-09-26
Dyke	2019-09-26 05:49:00	14.71	6.256	61.652	0	61.652	2019-09-26
Dyke	2019-09-26 05:59:00	14.693	6.203	61.1071	0	61.1071	2019-09-26
Dyke	2019-09-26 06:09:00	14.676	6.181	60.8679	0	60.8679	2019-09-26
Dyke	2019-09-26 06:19:00	14.693	6.038	59.4817	0	59.4817	2019-09-26
Dyke	2019-09-26 06:29:00	14.719	6.037	59.5054	0	59.5054	2019-09-26
Dyke	2019-09-26 06:39:00	14.71	5.994	59.07	0	59.07	2019-09-26
Dyke	2019-09-26 06:49:00	14.702	5.953	58.6558	0	58.6558	2019-09-26
Dyke	2019-09-26 06:59:00	14.71	5.923	58.3703	0	58.3703	2019-09-26
Dyke	2019-09-26 07:09:00	14.702	5.884	57.9759	0	57.9759	2019-09-26
Dyke	2019-09-26 07:19:00	14.667	5.85	57.5971	0	57.5971	2019-09-26
Dyke	2019-09-26 07:29:00	14.693	5.732	56.4672	0	56.4672	2019-09-26
Dyke	2019-09-26 07:39:00	14.754	5.735	56.5715	0	56.5715	2019-09-26
Dyke	2019-09-26 07:49:00	14.685	5.793	57.0582	0	57.0582	2019-09-26
Dyke	2019-09-26 07:59:00	14.736	5.798	57.1707	0	57.1707	2019-09-26
Dyke	2019-09-26 08:09:00	14.685	5.828	57.4029	0	57.4029	2019-09-26
Dyke	2019-09-26 08:19:00	14.719	5.84	57.5636	0	57.5636	2019-09-26
Dyke	2019-09-26 08:29:00	14.754	5.894	58.14	0	58.14	2019-09-26
Dyke	2019-09-26 08:39:00	14.728	5.972	58.8762	0	58.8762	2019-09-26
Dyke	2019-09-26 08:49:00	14.788	6.018	59.4069	0	59.4069	2019-09-26
Dyke	2019-09-26 08:59:00	14.78	6.064	59.8506	0	59.8506	2019-09-26
Dyke	2019-09-26 09:09:00	14.78	6.251	61.6963	0	61.6963	2019-09-26
Dyke	2019-09-26 09:19:00	14.84	6.277	62.0334	0	62.0334	2019-09-26
Dyke	2019-09-26 09:29:00	14.814	6.527	64.4678	0	64.4678	2019-09-26
Dyke	2019-09-26 09:39:00	14.986	6.965	69.0503	0	69.0503	2019-09-26
Dyke	2019-09-26 09:49:00	15.021	7.183	71.2653	0	71.2653	2019-09-26
Dyke	2019-09-26 09:59:00	14.995	7.458	73.9522	0	73.9522	2019-09-26
Dyke	2019-09-26 10:09:00	15.107	7.608	75.622	0	75.622	2019-09-26
Dyke	2019-09-26 10:19:00	15.296	7.686	76.7086	0	76.7086	2019-09-26
Dyke	2019-09-26 10:29:00	15.407	7.401	74.0404	0	74.0404	2019-09-26
Dyke	2019-09-26 10:39:00	15.476	7.8	78.1474	0	78.1474	2019-09-26
Dyke	2019-09-26 10:49:00	15.579	8.002	80.3481	0	80.3481	2019-09-26
Dyke	2019-09-26 10:59:00	15.527	8.07	80.9408	0	80.9408	2019-09-26
Dyke	2019-09-26 11:09:00	15.707	8.255	83.1153	0	83.1153	2019-09-26
Dyke	2019-09-26 11:19:00	15.733	8.482	85.4482	0	85.4482	2019-09-26
Dyke	2019-09-26 11:29:00	15.733	8.612	86.7578	0	86.7578	2019-09-26
Dyke	2019-09-26 11:39:00	15.776	8.845	89.1868	0	89.1868	2019-09-26
Dyke	2019-09-26 11:49:00	15.69	8.744	88.0069	0	88.0069	2019-09-26
Dyke	2019-09-26 11:59:00	15.733	9.599	96.7009	0	96.7009	2019-09-26
Dyke	2019-09-26 12:09:00	15.947	9.685	98.0126	0	98.0126	2019-09-26
Dyke	2019-09-26 12:19:00	15.801	10.35	104.418	0	104.418	2019-09-26
Dyke	2019-09-26 12:29:00	15.955	9.641	97.5839	0	97.5839	2019-09-26
Dyke	2019-09-26 12:39:00	16.006	10.409	105.472	0	105.472	2019-09-26
Dyke	2019-09-26 12:49:00	16.177	10.59	107.695	0	107.695	2019-09-26
Dyke	2019-09-26 12:59:00	16.032	11.161	113.154	0	113.154	2019-09-26
Dyke	2019-09-26 13:09:00	16.023	11.215	113.68	0	113.68	2019-09-26
Dyke	2019-09-26 13:19:00	15.998	11.584	117.358	0	117.358	2019-09-26
Dyke	2019-09-26 13:29:00	16.075	11.542	117.123	0	117.123	2019-09-26
Dyke	2019-09-26 13:39:00	16.083	11.695	118.696	0	118.696	2019-09-26
Dyke	2019-09-26 13:49:00	16.151	11.876	120.707	0	120.707	2019-09-26
Dyke	2019-09-26 13:59:00	16.109	11.891	120.752	0	120.752	2019-09-26
Dyke	2019-09-26 14:09:00	16.109	11.896	120.802	0	120.802	2019-09-26
Dyke	2019-09-26 14:19:00	16.202	12.039	122.495	0	122.495	2019-09-26
Dyke	2019-09-26 14:29:00	16.245	12.374	126.019	0	126.019	2019-09-26
Dyke	2019-09-26 14:39:00	16.347	12.584	128.434	0	128.434	2019-09-26
Dyke	2019-09-26 14:49:00	16.347	13.075	133.445	0	133.445	2019-09-26
Dyke	2019-09-26 14:59:00	16.347	13.384	136.598	0	136.598	2019-09-26
Dyke	2019-09-26 15:09:00	16.322	13.521	137.924	0	137.924	2019-09-26
Dyke	2019-09-26 15:19:00	16.356	13.846	141.341	0	141.341	2019-09-26
Dyke	2019-09-26 15:29:00	16.449	14.259	145.842	0	145.842	2019-09-26
Dyke	2019-09-26 15:39:00	16.441	14.665	149.969	0	149.969	2019-09-26
Dyke	2019-09-26 15:49:00	16.449	14.789	151.263	0	151.263	2019-09-26
Dyke	2019-09-26 15:59:00	16.543	16.256	166.597	0	166.597	2019-09-26
Dyke	2019-09-26 16:09:00	16.492	16.732	171.291	0	171.291	2019-09-26
Dyke	2019-09-26 16:19:00	16.483	15.623	159.908	0	159.908	2019-09-26
Dyke	2019-09-26 16:29:00	16.509	15.199	155.653	0	155.653	2019-09-26
Dyke	2019-09-26 16:39:00	16.619	15.661	160.756	0	160.756	2019-09-26
Dyke	2019-09-26 16:49:00	16.585	15.932	163.42	0	163.42	2019-09-26
Dyke	2019-09-26 16:59:00	16.56	15.09	154.702	0	154.702	2019-09-26
Dyke	2019-09-26 17:09:00	16.568	15.383	157.733	0	157.733	2019-09-26
Dyke	2019-09-26 17:19:00	16.696	16.305	167.637	0	167.637	2019-09-26
Dyke	2019-09-26 17:29:00	16.747	16.326	168.032	0	168.032	2019-09-26
Dyke	2019-09-26 17:39:00	16.806	16.695	172.043	0	172.043	2019-09-26
Dyke	2019-09-26 17:49:00	16.882	17.289	178.447	0	178.447	2019-09-26
Dyke	2019-09-26 17:59:00	16.832	17.263	177.993	0	177.993	2019-09-26
Dyke	2019-09-26 18:09:00	16.815	16.969	174.899	0	174.899	2019-09-26
Dyke	2019-09-26 18:19:00	16.823	16.88	174.011	0	174.011	2019-09-26
Dyke	2019-09-26 18:29:00	16.806	16.792	173.042	0	173.042	2019-09-26
Dyke	2019-09-26 18:39:00	16.781	16.492	169.862	0	169.862	2019-09-26
Dyke	2019-09-26 18:49:00	16.798	16.2	166.914	0	166.914	2019-09-26
Dyke	2019-09-26 18:59:00	16.781	16.046	165.268	0	165.268	2019-09-26
Dyke	2019-09-26 19:09:00	16.823	15.849	163.383	0	163.383	2019-09-26
Dyke	2019-09-26 19:19:00	16.806	15.717	161.964	0	161.964	2019-09-26
Dyke	2019-09-26 19:29:00	16.781	15.321	157.801	0	157.801	2019-09-26
Dyke	2019-09-26 19:39:00	16.772	15.038	154.857	0	154.857	2019-09-26
Dyke	2019-09-26 19:49:00	16.798	14.586	150.284	0	150.284	2019-09-26
Dyke	2019-09-26 19:59:00	16.73	14.13	145.378	0	145.378	2019-09-26
Dyke	2019-09-26 20:09:00	16.721	13.673	140.65	0	140.65	2019-09-26
Dyke	2019-09-26 20:19:00	16.721	13.342	137.245	0	137.245	2019-09-26
Dyke	2019-09-26 20:29:00	16.696	13.096	134.644	0	134.644	2019-09-26
Dyke	2019-09-26 20:39:00	16.679	12.881	132.386	0	132.386	2019-09-26
Dyke	2019-09-26 20:49:00	16.602	12.723	130.551	0	130.551	2019-09-26
Dyke	2019-09-26 20:59:00	16.594	12.517	128.416	0	128.416	2019-09-26
Dyke	2019-09-26 21:09:00	16.568	12.419	127.341	0	127.341	2019-09-26
Dyke	2019-09-26 21:19:00	16.449	12.537	128.229	0	128.229	2019-09-26
Dyke	2019-09-26 21:29:00	16.424	13.494	137.945	0	137.945	2019-09-26
Dyke	2019-09-26 21:39:00	16.305	14.748	150.386	0	150.386	2019-09-26
Dyke	2019-09-26 21:49:00	16.279	14.969	152.556	0	152.556	2019-09-26
Dyke	2019-09-26 21:59:00	16.211	15.018	152.836	0	152.836	2019-09-26
Dyke	2019-09-26 22:09:00	16.117	14.94	151.74	0	151.74	2019-09-26
Dyke	2019-09-26 22:19:00	16.066	14.847	150.632	0	150.632	2019-09-26
Dyke	2019-09-26 22:29:00	16.066	14.772	149.871	0	149.871	2019-09-26
Dyke	2019-09-26 22:39:00	16.015	14.738	149.365	0	149.365	2019-09-26
Dyke	2019-09-26 22:49:00	15.904	14.681	148.437	0	148.437	2019-09-26
Dyke	2019-09-26 22:59:00	15.861	14.575	147.23	0	147.23	2019-09-26
Dyke	2019-09-26 23:09:00	15.835	14.43	145.685	0	145.685	2019-09-26
Dyke	2019-09-26 23:19:00	15.776	14.332	144.514	0	144.514	2019-09-26
Dyke	2019-09-26 23:29:00	15.759	14.167	142.798	0	142.798	2019-09-26
Dyke	2019-09-26 23:39:00	15.63	14.082	141.552	0	141.552	2019-09-26
Dyke	2019-09-26 23:49:00	15.699	13.584	136.747	0	136.747	2019-09-26
Dyke	2019-09-26 23:59:00	15.605	13.776	138.402	0	138.402	2019-09-26
Dyke	2019-09-27 00:09:00	15.527	13.668	137.088	0	137.088	2019-09-27
Dyke	2019-09-27 00:19:00	15.467	13.536	135.59	0	135.59	2019-09-27
Dyke	2019-09-27 00:29:00	15.502	13.355	133.877	0	133.877	2019-09-27
Dyke	2019-09-27 00:39:00	15.467	13.172	131.944	0	131.944	2019-09-27
Dyke	2019-09-27 00:49:00	15.442	13.001	130.161	0	130.161	2019-09-27
Dyke	2019-09-27 00:59:00	15.407	12.849	128.543	0	128.543	2019-09-27
Dyke	2019-09-27 01:09:00	15.373	12.559	125.55	0	125.55	2019-09-27
Dyke	2019-09-27 01:19:00	15.279	12.431	124.02	0	124.02	2019-09-27
Dyke	2019-09-27 01:29:00	15.262	12.163	121.302	0	121.302	2019-09-27
Dyke	2019-09-27 01:39:00	15.253	11.879	118.447	0	118.447	2019-09-27
Dyke	2019-09-27 01:49:00	15.219	11.721	116.786	0	116.786	2019-09-27
Dyke	2019-09-27 01:59:00	15.253	11.341	113.082	0	113.082	2019-09-27
Dyke	2019-09-27 02:09:00	15.219	11.068	110.279	0	110.279	2019-09-27
Dyke	2019-09-27 02:19:00	15.158	10.774	107.209	0	107.209	2019-09-27
Dyke	2019-09-27 02:29:00	15.064	10.534	104.609	0	104.609	2019-09-27
Dyke	2019-09-27 02:39:00	15.029	10.055	99.7768	0	99.7768	2019-09-27
Dyke	2019-09-27 02:49:00	15.047	9.742	96.7084	0	96.7084	2019-09-27
Dyke	2019-09-27 02:59:00	15.021	9.369	92.9535	0	92.9535	2019-09-27
Dyke	2019-09-27 03:09:00	15.029	8.957	88.8812	0	88.8812	2019-09-27
Dyke	2019-09-27 03:19:00	14.995	8.646	85.7322	0	85.7322	2019-09-27
Dyke	2019-09-27 03:29:00	14.943	8.283	82.0406	0	82.0406	2019-09-27
Dyke	2019-09-27 03:39:00	14.917	8.01	79.292	0	79.292	2019-09-27
Dyke	2019-09-27 03:49:00	14.831	7.85	77.5637	0	77.5637	2019-09-27
Dyke	2019-09-27 03:59:00	14.849	7.641	75.5281	0	75.5281	2019-09-27
Dyke	2019-09-27 04:09:00	14.823	7.574	74.8237	0	74.8237	2019-09-27
Dyke	2019-09-27 04:19:00	14.728	7.454	73.4868	0	73.4868	2019-09-27
Dyke	2019-09-27 04:29:00	14.771	7.354	72.5685	0	72.5685	2019-09-27
Dyke	2019-09-27 04:39:00	14.728	7.256	71.5347	0	71.5347	2019-09-27
Dyke	2019-09-27 04:49:00	14.736	7.092	69.93	0	69.93	2019-09-27
Dyke	2019-09-27 04:59:00	14.641	7.062	69.4908	0	69.4908	2019-09-27
Dyke	2019-09-27 05:09:00	14.659	6.977	68.6812	0	68.6812	2019-09-27
Dyke	2019-09-27 05:19:00	14.598	6.952	68.3445	0	68.3445	2019-09-27
Dyke	2019-09-27 05:29:00	14.598	6.927	68.0987	0	68.0987	2019-09-27
Dyke	2019-09-27 05:39:00	14.477	6.851	67.1745	0	67.1745	2019-09-27
Dyke	2019-09-27 05:49:00	14.486	6.803	66.7169	0	66.7169	2019-09-27
Dyke	2019-09-27 05:59:00	14.512	6.737	66.1071	0	66.1071	2019-09-27
Dyke	2019-09-27 06:09:00	14.503	6.493	63.7003	0	63.7003	2019-09-27
Dyke	2019-09-27 06:19:00	14.434	6.608	64.7312	0	64.7312	2019-09-27
Dyke	2019-09-27 06:29:00	14.347	6.618	64.7062	0	64.7062	2019-09-27
Dyke	2019-09-27 06:39:00	14.347	6.601	64.54	0	64.54	2019-09-27
Dyke	2019-09-27 06:49:00	14.269	6.404	62.5073	0	62.5073	2019-09-27
Dyke	2019-09-27 06:59:00	14.347	6.198	60.5998	0	60.5998	2019-09-27
Dyke	2019-09-27 07:09:00	14.252	6.085	59.3716	0	59.3716	2019-09-27
Dyke	2019-09-27 07:19:00	14.165	6.062	59.0346	0	59.0346	2019-09-27
Dyke	2019-09-27 07:29:00	14.139	6.08	59.1762	0	59.1762	2019-09-27
Dyke	2019-09-27 07:39:00	14.165	6.126	59.6579	0	59.6579	2019-09-27
Dyke	2019-09-27 07:49:00	14.13	6.22	60.5269	0	60.5269	2019-09-27
Dyke	2019-09-27 07:59:00	14.122	6.439	62.647	0	62.647	2019-09-27
Dyke	2019-09-27 08:09:00	14.052	6.719	65.2709	0	65.2709	2019-09-27
Dyke	2019-09-27 08:19:00	14.148	7.11	69.2148	0	69.2148	2019-09-27
Dyke	2019-09-27 08:29:00	14.113	7.294	70.9516	0	70.9516	2019-09-27
Dyke	2019-09-27 08:39:00	14.122	7.508	73.0476	0	73.0476	2019-09-27
Dyke	2019-09-27 08:49:00	14.183	7.381	71.908	0	71.908	2019-09-27
Dyke	2019-09-27 08:59:00	14.183	7.115	69.3166	0	69.3166	2019-09-27
Dyke	2019-09-27 09:09:00	14.226	7.147	69.6939	0	69.6939	2019-09-27
Dyke	2019-09-27 09:19:00	14.287	7.233	70.6266	0	70.6266	2019-09-27
Dyke	2019-09-27 09:29:00	14.243	7.247	70.6953	0	70.6953	2019-09-27
Dyke	2019-09-27 09:39:00	14.304	7.347	71.7665	0	71.7665	2019-09-27
Dyke	2019-09-27 09:49:00	14.373	7.498	73.3519	0	73.3519	2019-09-27
Dyke	2019-09-27 09:59:00	14.321	7.693	75.1741	0	75.1741	2019-09-27
Dyke	2019-09-27 10:09:00	14.33	7.737	75.619	0	75.619	2019-09-27
Dyke	2019-09-27 10:19:00	14.365	7.789	76.1854	0	76.1854	2019-09-27
Dyke	2019-09-27 10:29:00	14.512	7.668	75.2426	0	75.2426	2019-09-27
Dyke	2019-09-27 10:39:00	14.52	7.98	78.3177	0	78.3177	2019-09-27
Dyke	2019-09-27 10:49:00	14.46	8.457	82.8907	0	82.8907	2019-09-27
Dyke	2019-09-27 10:59:00	14.538	8.657	84.9952	0	84.9952	2019-09-27
Dyke	2019-09-27 11:09:00	14.538	8.789	86.2912	0	86.2912	2019-09-27
Dyke	2019-09-27 11:19:00	14.607	8.863	87.1484	0	87.1484	2019-09-27
Dyke	2019-09-27 11:29:00	14.624	8.978	88.3118	0	88.3118	2019-09-27
Dyke	2019-09-27 11:39:00	14.65	9.277	91.3045	0	91.3045	2019-09-27
Dyke	2019-09-27 11:49:00	14.676	9.459	93.1483	0	93.1483	2019-09-27
Dyke	2019-09-27 11:59:00	14.676	9.772	96.2306	0	96.2306	2019-09-27
Dyke	2019-09-27 12:09:00	14.728	10.002	98.6067	0	98.6067	2019-09-27
Dyke	2019-09-27 12:19:00	14.745	10.067	99.2841	0	99.2841	2019-09-27
Dyke	2019-09-27 12:29:00	14.754	10.081	99.4416	0	99.4416	2019-09-27
Dyke	2019-09-27 12:39:00	14.728	9.937	97.9659	0	97.9659	2019-09-27
Dyke	2019-09-27 12:49:00	14.823	9.401	92.8727	0	92.8727	2019-09-27
Dyke	2019-09-27 12:59:00	14.788	9.15	90.3245	0	90.3245	2019-09-27
Dyke	2019-09-27 13:09:00	14.805	9.124	90.101	0	90.101	2019-09-27
Dyke	2019-09-27 13:19:00	14.771	9.226	91.0412	0	91.0412	2019-09-27
Dyke	2019-09-27 13:29:00	14.805	9.308	91.9181	0	91.9181	2019-09-27
Dyke	2019-09-27 13:39:00	14.84	9.431	93.2033	0	93.2033	2019-09-27
Dyke	2019-09-27 13:49:00	14.866	9.724	96.153	0	96.153	2019-09-27
Dyke	2019-09-27 13:59:00	14.823	10.369	102.436	0	102.436	2019-09-27
Dyke	2019-09-27 14:09:00	14.849	10.525	104.035	0	104.035	2019-09-27
Dyke	2019-09-27 14:19:00	14.935	10.553	104.506	0	104.506	2019-09-27
Dyke	2019-09-27 14:29:00	14.978	10.657	105.634	0	105.634	2019-09-27
Dyke	2019-09-27 14:39:00	15.012	10.578	104.928	0	104.928	2019-09-27
Dyke	2019-09-27 14:49:00	15.029	10.878	107.944	0	107.944	2019-09-27
Dyke	2019-09-27 14:59:00	15.09	11.442	113.69	0	113.69	2019-09-27
Dyke	2019-09-27 15:09:00	15.158	11.883	118.245	0	118.245	2019-09-27
Dyke	2019-09-27 15:19:00	15.184	12.377	123.229	0	123.229	2019-09-27
Dyke	2019-09-27 15:29:00	15.236	12.883	128.411	0	128.411	2019-09-27
Dyke	2019-09-27 15:39:00	15.244	12.783	127.436	0	127.436	2019-09-27
Dyke	2019-09-27 15:49:00	15.236	12.583	125.42	0	125.42	2019-09-27
Dyke	2019-09-27 15:59:00	15.673	15.701	157.971	0	157.971	2019-09-27
Dyke	2019-09-27 16:09:00	15.476	14.361	143.881	0	143.881	2019-09-27
Dyke	2019-09-27 16:19:00	15.279	13.616	135.842	0	135.842	2019-09-27
Dyke	2019-09-27 16:29:00	15.236	13.413	133.693	0	133.693	2019-09-27
Dyke	2019-09-27 16:39:00	15.219	13.19	131.423	0	131.423	2019-09-27
Dyke	2019-09-27 16:49:00	15.227	13.322	132.761	0	132.761	2019-09-27
Dyke	2019-09-27 16:59:00	15.176	13.614	135.522	0	135.522	2019-09-27
Dyke	2019-09-27 17:09:00	15.21	13.647	135.95	0	135.95	2019-09-27
Dyke	2019-09-27 17:19:00	15.158	13.85	137.818	0	137.818	2019-09-27
Dyke	2019-09-27 17:29:00	15.184	14.161	140.991	0	140.991	2019-09-27
Dyke	2019-09-27 17:39:00	15.115	13.943	138.615	0	138.615	2019-09-27
Dyke	2019-09-27 17:49:00	15.055	13.982	138.823	0	138.823	2019-09-27
Dyke	2019-09-27 17:59:00	15.055	13.949	138.495	0	138.495	2019-09-27
Dyke	2019-09-27 18:09:00	14.978	14.102	139.782	0	139.782	2019-09-27
Dyke	2019-09-27 18:19:00	14.943	14.18	140.449	0	140.449	2019-09-27
Dyke	2019-09-27 18:29:00	14.831	14.346	141.749	0	141.749	2019-09-27
Dyke	2019-09-27 18:39:00	14.728	14.608	144.016	0	144.016	2019-09-27
Dyke	2019-09-27 18:49:00	14.728	14.531	143.257	0	143.257	2019-09-27
Dyke	2019-09-27 18:59:00	14.641	14.74	145.043	0	145.043	2019-09-27
Dyke	2019-09-27 19:09:00	14.59	14.741	144.892	0	144.892	2019-09-27
Dyke	2019-09-27 19:19:00	14.46	14.499	142.111	0	142.111	2019-09-27
Dyke	2019-09-27 19:29:00	14.425	14.465	141.67	0	141.67	2019-09-27
Dyke	2019-09-27 19:39:00	14.382	14.225	139.188	0	139.188	2019-09-27
Dyke	2019-09-27 19:49:00	14.313	14.063	137.396	0	137.396	2019-09-27
Dyke	2019-09-27 19:59:00	14.235	13.969	136.245	0	136.245	2019-09-27
Dyke	2019-09-27 20:09:00	14.209	13.849	134.998	0	134.998	2019-09-27
Dyke	2019-09-27 20:19:00	14.148	13.769	134.039	0	134.039	2019-09-27
Dyke	2019-09-27 20:29:00	14.07	13.644	132.595	0	132.595	2019-09-27
Dyke	2019-09-27 20:39:00	14.026	13.548	131.535	0	131.535	2019-09-27
Dyke	2019-09-27 20:49:00	13.965	13.459	130.496	0	130.496	2019-09-27
Dyke	2019-09-27 20:59:00	13.957	13.275	128.69	0	128.69	2019-09-27
Dyke	2019-09-27 21:09:00	13.896	13.191	127.704	0	127.704	2019-09-27
Dyke	2019-09-27 21:19:00	13.896	13.07	126.533	0	126.533	2019-09-27
Dyke	2019-09-27 21:29:00	13.809	12.891	124.561	0	124.561	2019-09-27
Dyke	2019-09-27 21:39:00	13.817	12.671	122.457	0	122.457	2019-09-27
Dyke	2019-09-27 21:49:00	13.695	12.537	120.836	0	120.836	2019-09-27
Dyke	2019-09-27 21:59:00	13.722	12.226	117.909	0	117.909	2019-09-27
Dyke	2019-09-27 22:09:00	13.713	12.034	116.034	0	116.034	2019-09-27
Dyke	2019-09-27 22:19:00	13.599	11.923	114.674	0	114.674	2019-09-27
Dyke	2019-09-27 22:29:00	13.617	11.812	113.652	0	113.652	2019-09-27
Dyke	2019-09-27 22:39:00	13.468	11.827	113.422	0	113.422	2019-09-27
Dyke	2019-09-27 22:49:00	13.529	11.713	112.48	0	112.48	2019-09-27
Dyke	2019-09-27 22:59:00	13.486	11.525	110.57	0	110.57	2019-09-27
Dyke	2019-09-27 23:09:00	13.495	11.347	108.884	0	108.884	2019-09-27
Dyke	2019-09-27 23:19:00	13.477	11.183	107.267	0	107.267	2019-09-27
Dyke	2019-09-27 23:29:00	13.442	10.943	104.884	0	104.884	2019-09-27
Dyke	2019-09-27 23:39:00	13.442	10.845	103.944	0	103.944	2019-09-27
Dyke	2019-09-27 23:49:00	13.372	10.781	103.171	0	103.171	2019-09-27
Dyke	2019-09-27 23:59:00	13.346	10.668	102.03	0	102.03	2019-09-27
Dyke	2019-09-28 00:09:00	13.319	10.57	101.032	0	101.032	2019-09-28
Dyke	2019-09-28 00:19:00	13.319	10.492	100.287	0	100.287	2019-09-28
Dyke	2019-09-28 00:29:00	13.293	10.374	99.1016	0	99.1016	2019-09-28
Dyke	2019-09-28 00:39:00	13.311	10.2	97.4784	0	97.4784	2019-09-28
Dyke	2019-09-28 00:49:00	13.284	10.085	96.3215	0	96.3215	2019-09-28
Dyke	2019-09-28 00:59:00	13.17	10.049	95.7344	0	95.7344	2019-09-28
Dyke	2019-09-28 01:09:00	13.1	9.919	94.3486	0	94.3486	2019-09-28
Dyke	2019-09-28 01:19:00	13.109	9.785	93.0927	0	93.0927	2019-09-28
Dyke	2019-09-28 01:29:00	13.091	9.759	92.808	0	92.808	2019-09-28
Dyke	2019-09-28 01:39:00	13.021	9.697	92.0744	0	92.0744	2019-09-28
Dyke	2019-09-28 01:49:00	13.039	9.557	90.7816	0	90.7816	2019-09-28
Dyke	2019-09-28 01:59:00	12.977	9.439	89.5366	0	89.5366	2019-09-28
Dyke	2019-09-28 02:09:00	13.004	9.385	89.0781	0	89.0781	2019-09-28
Dyke	2019-09-28 02:19:00	13.021	9.389	89.1499	0	89.1499	2019-09-28
Dyke	2019-09-28 02:29:00	12.872	9.358	88.5599	0	88.5599	2019-09-28
Dyke	2019-09-28 02:39:00	12.854	9.177	86.812	0	86.812	2019-09-28
Dyke	2019-09-28 02:49:00	12.88	9.091	86.0485	0	86.0485	2019-09-28
Dyke	2019-09-28 02:59:00	12.81	9.107	86.0649	0	86.0649	2019-09-28
Dyke	2019-09-28 03:09:00	12.783	9.014	85.1344	0	85.1344	2019-09-28
Dyke	2019-09-28 03:19:00	12.801	8.778	82.9389	0	82.9389	2019-09-28
Dyke	2019-09-28 03:29:00	12.748	8.706	82.1609	0	82.1609	2019-09-28
Dyke	2019-09-28 03:39:00	12.757	8.693	82.0548	0	82.0548	2019-09-28
Dyke	2019-09-28 03:49:00	12.713	8.729	82.3132	0	82.3132	2019-09-28
Dyke	2019-09-28 03:59:00	12.704	8.814	83.098	0	83.098	2019-09-28
Dyke	2019-09-28 04:09:00	12.686	8.819	83.1115	0	83.1115	2019-09-28
Dyke	2019-09-28 04:19:00	12.669	8.848	83.3529	0	83.3529	2019-09-28
Dyke	2019-09-28 04:29:00	12.66	8.711	82.0457	0	82.0457	2019-09-28
Dyke	2019-09-28 04:39:00	12.625	8.69	81.7835	0	81.7835	2019-09-28
Dyke	2019-09-28 04:49:00	12.589	8.66	81.4352	0	81.4352	2019-09-28
Dyke	2019-09-28 04:59:00	12.607	8.617	81.0637	0	81.0637	2019-09-28
Dyke	2019-09-28 05:09:00	12.625	8.624	81.1624	0	81.1624	2019-09-28
Dyke	2019-09-28 05:19:00	12.607	8.617	81.0637	0	81.0637	2019-09-28
Dyke	2019-09-28 05:29:00	12.589	8.527	80.1845	0	80.1845	2019-09-28
Dyke	2019-09-28 05:39:00	12.642	8.424	79.3105	0	79.3105	2019-09-28
Dyke	2019-09-28 05:49:00	12.554	8.393	78.8622	0	78.8622	2019-09-28
Dyke	2019-09-28 05:59:00	12.545	8.365	78.5832	0	78.5832	2019-09-28
Dyke	2019-09-28 06:09:00	12.598	8.269	77.7741	0	77.7741	2019-09-28
Dyke	2019-09-28 06:19:00	12.58	8.253	77.5922	0	77.5922	2019-09-28
Dyke	2019-09-28 06:29:00	12.607	8.189	77.0373	0	77.0373	2019-09-28
Dyke	2019-09-28 06:39:00	12.545	8.122	76.3004	0	76.3004	2019-09-28
Dyke	2019-09-28 06:49:00	12.545	8.021	75.3516	0	75.3516	2019-09-28
Dyke	2019-09-28 06:59:00	12.554	7.99	75.0756	0	75.0756	2019-09-28
Dyke	2019-09-28 07:09:00	12.483	7.976	74.8242	0	74.8242	2019-09-28
Dyke	2019-09-28 07:19:00	12.527	7.957	74.72	0	74.72	2019-09-28
Dyke	2019-09-28 07:29:00	12.448	7.939	74.4183	0	74.4183	2019-09-28
Dyke	2019-09-28 07:39:00	12.51	7.896	74.1188	0	74.1188	2019-09-28
Dyke	2019-09-28 07:49:00	12.519	7.905	74.2184	0	74.2184	2019-09-28
Dyke	2019-09-28 07:59:00	12.501	8.002	75.0986	0	75.0986	2019-09-28
Dyke	2019-09-28 08:09:00	12.519	8.112	76.1618	0	76.1618	2019-09-28
Dyke	2019-09-28 08:19:00	12.536	8.249	77.4778	0	77.4778	2019-09-28
Dyke	2019-09-28 08:29:00	12.545	8.475	79.6166	0	79.6166	2019-09-28
Dyke	2019-09-28 08:39:00	12.563	8.476	79.6583	0	79.6583	2019-09-28
Dyke	2019-09-28 08:49:00	12.625	8.552	80.4848	0	80.4848	2019-09-28
Dyke	2019-09-28 08:59:00	12.678	8.885	83.7184	0	83.7184	2019-09-28
Dyke	2019-09-28 09:09:00	12.686	9.066	85.4392	0	85.4392	2019-09-28
Dyke	2019-09-28 09:19:00	12.775	9.299	87.8104	0	87.8104	2019-09-28
Dyke	2019-09-28 09:29:00	12.81	9.628	90.9885	0	90.9885	2019-09-28
Dyke	2019-09-28 09:39:00	12.854	9.833	93.0176	0	93.0176	2019-09-28
Dyke	2019-09-28 09:49:00	12.889	10.096	95.5804	0	95.5804	2019-09-28
Dyke	2019-09-28 09:59:00	13.03	10.615	100.811	0	100.811	2019-09-28
Dyke	2019-09-28 10:09:00	13.118	11.178	106.367	0	106.367	2019-09-28
Dyke	2019-09-28 10:19:00	13.162	11.514	109.672	0	109.672	2019-09-28
Dyke	2019-09-28 10:29:00	13.293	11.824	112.953	0	112.953	2019-09-28
Dyke	2019-09-28 10:39:00	13.407	12.592	120.595	0	120.595	2019-09-28
Dyke	2019-09-28 10:49:00	13.512	12.949	124.303	0	124.303	2019-09-28
Dyke	2019-09-28 10:59:00	13.512	13.297	127.644	0	127.644	2019-09-28
Dyke	2019-09-28 11:09:00	13.599	13.782	132.554	0	132.554	2019-09-28
Dyke	2019-09-28 11:19:00	13.687	14.243	137.255	0	137.255	2019-09-28
Dyke	2019-09-28 11:29:00	13.783	14.816	143.079	0	143.079	2019-09-28
Dyke	2019-09-28 11:39:00	13.878	14.923	144.414	0	144.414	2019-09-28
Dyke	2019-09-28 11:49:00	14.217	13.502	131.639	0	131.639	2019-09-28
Dyke	2019-09-28 11:59:00	14.278	13.06	127.499	0	127.499	2019-09-28
Dyke	2019-09-28 12:09:00	14.659	13.058	128.542	0	128.542	2019-09-28
Dyke	2019-09-28 12:19:00	14.373	13.862	135.61	0	135.61	2019-09-28
Dyke	2019-09-28 12:29:00	14.952	13.228	131.045	0	131.045	2019-09-28
Dyke	2019-09-28 12:39:00	14.702	14.101	138.939	0	138.939	2019-09-28
Dyke	2019-09-28 12:49:00	15.029	13.685	135.798	0	135.798	2019-09-28
Dyke	2019-09-28 12:59:00	15.047	13.482	133.835	0	133.835	2019-09-28
Dyke	2019-09-28 13:09:00	15.193	13.952	138.937	0	138.937	2019-09-28
Dyke	2019-09-28 13:19:00	15.356	13.922	139.125	0	139.125	2019-09-28
Dyke	2019-09-28 13:29:00	15.064	13.016	129.257	0	129.257	2019-09-28
Dyke	2019-09-28 13:39:00	14.952	13.162	130.391	0	130.391	2019-09-28
Dyke	2019-09-28 13:49:00	14.805	13.17	130.056	0	130.056	2019-09-28
Dyke	2019-09-28 13:59:00	14.771	13.224	130.493	0	130.493	2019-09-28
Dyke	2019-09-28 14:09:00	14.823	12.977	128.2	0	128.2	2019-09-28
Dyke	2019-09-28 14:19:00	14.849	13.074	129.231	0	129.231	2019-09-28
Dyke	2019-09-28 14:29:00	14.9	13.307	131.679	0	131.679	2019-09-28
Dyke	2019-09-28 14:39:00	14.65	14.876	146.41	0	146.41	2019-09-28
Dyke	2019-09-28 14:49:00	14.529	14.944	146.693	0	146.693	2019-09-28
Dyke	2019-09-28 14:59:00	14.477	16.627	163.029	0	163.029	2019-09-28
Dyke	2019-09-28 15:09:00	14.434	17.293	169.4	0	169.4	2019-09-28
Dyke	2019-09-28 15:19:00	14.391	17.73	173.518	0	173.518	2019-09-28
Dyke	2019-09-28 15:29:00	14.391	17.241	168.733	0	168.733	2019-09-28
Dyke	2019-09-28 15:39:00	14.408	16.911	165.564	0	165.564	2019-09-28
Dyke	2019-09-28 15:49:00	14.494	16.045	157.381	0	157.381	2019-09-28
Dyke	2019-09-28 15:59:00	14.572	15.275	150.082	0	150.082	2019-09-28
Dyke	2019-09-28 16:09:00	14.607	14.59	143.461	0	143.461	2019-09-28
Dyke	2019-09-28 16:19:00	14.65	14.733	145.003	0	145.003	2019-09-28
Dyke	2019-09-28 16:29:00	14.641	14.584	143.508	0	143.508	2019-09-28
Dyke	2019-09-28 16:39:00	14.667	14.109	138.912	0	138.912	2019-09-28
Dyke	2019-09-28 16:49:00	14.814	13.892	137.213	0	137.213	2019-09-28
Dyke	2019-09-28 16:59:00	14.78	13.759	135.799	0	135.799	2019-09-28
Dyke	2019-09-28 17:09:00	14.797	13.496	133.252	0	133.252	2019-09-28
Dyke	2019-09-28 17:19:00	14.762	13.37	131.908	0	131.908	2019-09-28
Dyke	2019-09-28 17:29:00	14.754	13.143	129.646	0	129.646	2019-09-28
Dyke	2019-09-28 17:39:00	14.728	12.993	128.094	0	128.094	2019-09-28
Dyke	2019-09-28 17:49:00	14.805	12.827	126.669	0	126.669	2019-09-28
Dyke	2019-09-28 17:59:00	14.71	12.744	125.59	0	125.59	2019-09-28
Dyke	2019-09-28 18:09:00	14.797	12.568	124.09	0	124.09	2019-09-28
Dyke	2019-09-28 18:19:00	14.84	12.467	123.207	0	123.207	2019-09-28
Dyke	2019-09-28 18:29:00	14.797	12.442	122.846	0	122.846	2019-09-28
Dyke	2019-09-28 18:39:00	14.797	12.425	122.678	0	122.678	2019-09-28
Dyke	2019-09-28 18:49:00	14.736	12.393	122.2	0	122.2	2019-09-28
Dyke	2019-09-28 18:59:00	14.823	12.315	121.66	0	121.66	2019-09-28
Dyke	2019-09-28 19:09:00	14.823	12.265	121.166	0	121.166	2019-09-28
Dyke	2019-09-28 19:19:00	14.736	12.258	120.869	0	120.869	2019-09-28
Dyke	2019-09-28 19:29:00	14.797	12.19	120.357	0	120.357	2019-09-28
Dyke	2019-09-28 19:39:00	14.805	12.148	119.964	0	119.964	2019-09-28
Dyke	2019-09-28 19:49:00	14.805	12.203	120.507	0	120.507	2019-09-28
Dyke	2019-09-28 19:59:00	14.788	12.306	121.479	0	121.479	2019-09-28
Dyke	2019-09-28 20:09:00	14.745	12.425	122.54	0	122.54	2019-09-28
Dyke	2019-09-28 20:19:00	14.788	12.603	124.411	0	124.411	2019-09-28
Dyke	2019-09-28 20:29:00	14.745	12.816	126.396	0	126.396	2019-09-28
Dyke	2019-09-28 20:39:00	14.78	13.012	128.426	0	128.426	2019-09-28
Dyke	2019-09-28 20:49:00	14.745	13.12	129.394	0	129.394	2019-09-28
Dyke	2019-09-28 20:59:00	14.762	13.372	131.928	0	131.928	2019-09-28
Dyke	2019-09-28 21:09:00	14.745	13.661	134.729	0	134.729	2019-09-28
Dyke	2019-09-28 21:19:00	14.719	14.016	138.153	0	138.153	2019-09-28
Dyke	2019-09-28 21:29:00	14.667	14.324	141.029	0	141.029	2019-09-28
Dyke	2019-09-28 21:39:00	14.659	14.524	142.974	0	142.974	2019-09-28
Dyke	2019-09-28 21:49:00	14.659	14.622	143.938	0	143.938	2019-09-28
Dyke	2019-09-28 21:59:00	14.607	14.634	143.894	0	143.894	2019-09-28
Dyke	2019-09-28 22:09:00	14.607	14.593	143.491	0	143.491	2019-09-28
Dyke	2019-09-28 22:19:00	14.598	14.551	143.05	0	143.05	2019-09-28
Dyke	2019-09-28 22:29:00	14.598	14.6	143.531	0	143.531	2019-09-28
Dyke	2019-09-28 22:39:00	14.572	14.82	145.612	0	145.612	2019-09-28
Dyke	2019-09-28 22:49:00	14.581	14.872	146.151	0	146.151	2019-09-28
Dyke	2019-09-28 22:59:00	14.52	14.859	145.83	0	145.83	2019-09-28
Dyke	2019-09-28 23:09:00	14.581	14.811	145.552	0	145.552	2019-09-28
Dyke	2019-09-28 23:19:00	14.581	14.792	145.365	0	145.365	2019-09-28
Dyke	2019-09-28 23:29:00	14.503	14.883	146.011	0	146.011	2019-09-28
Dyke	2019-09-28 23:39:00	14.581	14.935	146.77	0	146.77	2019-09-28
Dyke	2019-09-28 23:49:00	14.59	14.971	147.153	0	147.153	2019-09-28
Dyke	2019-09-28 23:59:00	14.538	15.045	147.713	0	147.713	2019-09-28
Dyke	2019-09-29 00:09:00	14.52	15.082	148.019	0	148.019	2019-09-29
Dyke	2019-09-29 00:19:00	14.494	15.056	147.68	0	147.68	2019-09-29
Dyke	2019-09-29 00:29:00	14.503	14.886	146.041	0	146.041	2019-09-29
Dyke	2019-09-29 00:39:00	14.443	14.925	146.232	0	146.232	2019-09-29
Dyke	2019-09-29 00:49:00	14.443	14.927	146.252	0	146.252	2019-09-29
Dyke	2019-09-29 00:59:00	14.373	14.698	143.788	0	143.788	2019-09-29
Dyke	2019-09-29 01:09:00	14.287	14.35	140.121	0	140.121	2019-09-29
Dyke	2019-09-29 01:19:00	14.157	13.516	131.602	0	131.602	2019-09-29
Dyke	2019-09-29 01:29:00	14.07	12.094	117.532	0	117.532	2019-09-29
Dyke	2019-09-29 01:39:00	13.965	11.306	109.621	0	109.621	2019-09-29
Dyke	2019-09-29 01:49:00	13.87	10.747	103.984	0	103.984	2019-09-29
Dyke	2019-09-29 01:59:00	13.835	10.454	101.071	0	101.071	2019-09-29
Dyke	2019-09-29 02:09:00	13.87	10.354	100.181	0	100.181	2019-09-29
Dyke	2019-09-29 02:19:00	14	10.473	101.623	0	101.623	2019-09-29
Dyke	2019-09-29 02:29:00	14.035	9.579	93.0194	0	93.0194	2019-09-29
Dyke	2019-09-29 02:39:00	14.061	8.803	85.5326	0	85.5326	2019-09-29
Dyke	2019-09-29 02:49:00	14.07	8.079	78.5135	0	78.5135	2019-09-29
Dyke	2019-09-29 02:59:00	14.052	7.611	73.9362	0	73.9362	2019-09-29
Dyke	2019-09-29 03:09:00	13.974	7.3	70.7936	0	70.7936	2019-09-29
Dyke	2019-09-29 03:19:00	13.844	7.083	68.4931	0	68.4931	2019-09-29
Dyke	2019-09-29 03:29:00	13.774	7.035	67.9241	0	67.9241	2019-09-29
Dyke	2019-09-29 03:39:00	13.791	6.98	67.4183	0	67.4183	2019-09-29
Dyke	2019-09-29 03:49:00	13.713	6.977	67.2735	0	67.2735	2019-09-29
Dyke	2019-09-29 03:59:00	13.73	7.094	68.4273	0	68.4273	2019-09-29
Dyke	2019-09-29 04:09:00	13.765	7.148	69.0014	0	69.0014	2019-09-29
Dyke	2019-09-29 04:19:00	13.791	7.195	69.4949	0	69.4949	2019-09-29
Dyke	2019-09-29 04:29:00	13.835	7.246	70.0554	0	70.0554	2019-09-29
Dyke	2019-09-29 04:39:00	13.861	7.323	70.8404	0	70.8404	2019-09-29
Dyke	2019-09-29 04:49:00	13.887	7.321	70.8616	0	70.8616	2019-09-29
Dyke	2019-09-29 04:59:00	13.965	7.32	70.9736	0	70.9736	2019-09-29
Dyke	2019-09-29 05:09:00	14.052	7.306	70.9733	0	70.9733	2019-09-29
Dyke	2019-09-29 05:19:00	14.104	7.284	70.8403	0	70.8403	2019-09-29
Dyke	2019-09-29 05:29:00	14.087	7.32	71.1639	0	71.1639	2019-09-29
Dyke	2019-09-29 05:39:00	14.122	7.281	70.8391	0	70.8391	2019-09-29
Dyke	2019-09-29 05:49:00	14.104	7.284	70.8403	0	70.8403	2019-09-29
Dyke	2019-09-29 05:59:00	14.217	7.226	70.4504	0	70.4504	2019-09-29
Dyke	2019-09-29 06:09:00	14.174	7.214	70.2672	0	70.2672	2019-09-29
Dyke	2019-09-29 06:19:00	14.226	7.152	69.7426	0	69.7426	2019-09-29
Dyke	2019-09-29 06:29:00	14.243	7.163	69.8759	0	69.8759	2019-09-29
Dyke	2019-09-29 06:39:00	14.243	7.144	69.6905	0	69.6905	2019-09-29
Dyke	2019-09-29 06:49:00	14.261	7.127	69.5521	0	69.5521	2019-09-29
Dyke	2019-09-29 06:59:00	14.261	7.076	69.0544	0	69.0544	2019-09-29
Dyke	2019-09-29 07:09:00	14.278	7.051	68.836	0	68.836	2019-09-29
Dyke	2019-09-29 07:19:00	14.304	7.019	68.5625	0	68.5625	2019-09-29
Dyke	2019-09-29 07:29:00	14.321	6.983	68.2362	0	68.2362	2019-09-29
Dyke	2019-09-29 07:39:00	14.304	6.976	68.1425	0	68.1425	2019-09-29
Dyke	2019-09-29 07:49:00	14.339	6.943	67.872	0	67.872	2019-09-29
Dyke	2019-09-29 07:59:00	14.321	6.924	67.6597	0	67.6597	2019-09-29
Dyke	2019-09-29 08:09:00	14.417	6.909	67.6547	0	67.6547	2019-09-29
Dyke	2019-09-29 08:19:00	14.356	6.922	67.6918	0	67.6918	2019-09-29
Dyke	2019-09-29 08:29:00	14.373	6.923	67.7267	0	67.7267	2019-09-29
Dyke	2019-09-29 08:39:00	14.365	6.852	67.0204	0	67.0204	2019-09-29
Dyke	2019-09-29 08:49:00	14.356	6.884	67.3202	0	67.3202	2019-09-29
Dyke	2019-09-29 08:59:00	14.365	6.847	66.9715	0	66.9715	2019-09-29
Dyke	2019-09-29 09:09:00	14.347	6.851	66.9843	0	66.9843	2019-09-29
Dyke	2019-09-29 09:19:00	14.365	6.838	66.8835	0	66.8835	2019-09-29
Dyke	2019-09-29 09:29:00	14.365	6.828	66.7857	0	66.7857	2019-09-29
Dyke	2019-09-29 09:39:00	14.417	6.778	66.3719	0	66.3719	2019-09-29
Dyke	2019-09-29 09:49:00	14.408	6.796	66.5351	0	66.5351	2019-09-29
Dyke	2019-09-29 09:59:00	14.408	6.817	66.7407	0	66.7407	2019-09-29
Dyke	2019-09-29 10:09:00	14.408	6.762	66.2022	0	66.2022	2019-09-29
Dyke	2019-09-29 10:19:00	14.399	6.799	66.5514	0	66.5514	2019-09-29
Dyke	2019-09-29 10:29:00	14.382	6.774	66.2821	0	66.2821	2019-09-29
Dyke	2019-09-29 10:39:00	14.434	6.714	65.7695	0	65.7695	2019-09-29
Dyke	2019-09-29 10:49:00	14.382	6.635	64.922	0	64.922	2019-09-29
Dyke	2019-09-29 10:59:00	14.451	6.666	65.3235	0	65.3235	2019-09-29
Dyke	2019-09-29 11:09:00	14.46	6.634	65.0227	0	65.0227	2019-09-29
Dyke	2019-09-29 11:19:00	14.46	6.613	64.8169	0	64.8169	2019-09-29
Dyke	2019-09-29 11:29:00	14.486	6.571	64.4417	0	64.4417	2019-09-29
Dyke	2019-09-29 11:39:00	14.443	6.57	64.3716	0	64.3716	2019-09-29
Dyke	2019-09-29 11:49:00	14.529	6.536	64.1585	0	64.1585	2019-09-29
Dyke	2019-09-29 11:59:00	14.52	6.55	64.2833	0	64.2833	2019-09-29
Dyke	2019-09-29 12:09:00	14.564	6.513	63.9814	0	63.9814	2019-09-29
Dyke	2019-09-29 12:19:00	14.555	6.529	64.126	0	64.126	2019-09-29
Dyke	2019-09-29 12:29:00	14.581	6.508	63.9559	0	63.9559	2019-09-29
Dyke	2019-09-29 12:39:00	14.581	6.48	63.6808	0	63.6808	2019-09-29
Dyke	2019-09-29 12:49:00	14.564	6.461	63.4706	0	63.4706	2019-09-29
Dyke	2019-09-29 12:59:00	14.503	6.461	63.3864	0	63.3864	2019-09-29
Dyke	2019-09-29 13:09:00	14.52	6.26	61.4372	0	61.4372	2019-09-29
Dyke	2019-09-29 13:19:00	14.52	6.274	61.5746	0	61.5746	2019-09-29
Dyke	2019-09-29 13:29:00	14.581	6.236	61.2829	0	61.2829	2019-09-29
Dyke	2019-09-29 13:39:00	14.555	6.21	60.9929	0	60.9929	2019-09-29
Dyke	2019-09-29 13:49:00	14.624	6.23	61.2812	0	61.2812	2019-09-29
Dyke	2019-09-29 13:59:00	14.615	6.054	59.5383	0	59.5383	2019-09-29
Dyke	2019-09-29 14:09:00	14.659	6.201	61.0423	0	61.0423	2019-09-29
Dyke	2019-09-29 14:19:00	14.71	6.199	61.0902	0	61.0902	2019-09-29
Dyke	2019-09-29 14:29:00	14.641	6.265	61.6482	0	61.6482	2019-09-29
Dyke	2019-09-29 14:39:00	14.736	6.124	60.3852	0	60.3852	2019-09-29
Dyke	2019-09-29 14:49:00	14.641	6.042	59.4539	0	59.4539	2019-09-29
Dyke	2019-09-29 14:59:00	14.667	5.99	58.9755	0	58.9755	2019-09-29
Dyke	2019-09-29 15:09:00	14.771	5.88	58.0232	0	58.0232	2019-09-29
Dyke	2019-09-29 15:19:00	14.771	5.822	57.4509	0	57.4509	2019-09-29
Dyke	2019-09-29 15:29:00	14.78	5.765	56.8995	0	56.8995	2019-09-29
Dyke	2019-09-29 15:39:00	14.762	5.731	56.5419	0	56.5419	2019-09-29
Dyke	2019-09-29 15:49:00	14.805	5.534	54.6492	0	54.6492	2019-09-29
Dyke	2019-09-29 15:59:00	14.788	5.448	53.7801	0	53.7801	2019-09-29
Dyke	2019-09-29 16:09:00	14.874	5.385	53.2573	0	53.2573	2019-09-29
Dyke	2019-09-29 16:19:00	14.849	5.312	52.5069	0	52.5069	2019-09-29
Dyke	2019-09-29 16:29:00	14.849	5.286	52.2499	0	52.2499	2019-09-29
Dyke	2019-09-29 16:39:00	14.935	5.327	52.7532	0	52.7532	2019-09-29
Dyke	2019-09-29 16:49:00	14.986	5.404	53.5747	0	53.5747	2019-09-29
Dyke	2019-09-29 16:59:00	15.124	5.912	58.7857	0	58.7857	2019-09-29
Dyke	2019-09-29 17:09:00	15.133	6.149	61.1541	0	61.1541	2019-09-29
Dyke	2019-09-29 17:19:00	15.287	6.348	63.3427	0	63.3427	2019-09-29
Dyke	2019-09-29 17:29:00	15.382	6.586	65.8517	0	65.8517	2019-09-29
Dyke	2019-09-29 17:39:00	15.407	6.646	66.4873	0	66.4873	2019-09-29
Dyke	2019-09-29 17:49:00	15.365	6.655	66.5174	0	66.5174	2019-09-29
Dyke	2019-09-29 17:59:00	15.373	6.588	65.859	0	65.859	2019-09-29
Dyke	2019-09-29 18:09:00	15.253	6.558	65.3904	0	65.3904	2019-09-29
Dyke	2019-09-29 18:19:00	15.184	6.508	64.7956	0	64.7956	2019-09-29
Dyke	2019-09-29 18:29:00	15.055	6.545	64.9831	0	64.9831	2019-09-29
Dyke	2019-09-29 18:39:00	14.995	6.589	65.3354	0	65.3354	2019-09-29
Dyke	2019-09-29 18:49:00	14.952	6.617	65.5521	0	65.5521	2019-09-29
Dyke	2019-09-29 18:59:00	14.771	6.679	65.9077	0	65.9077	2019-09-29
Dyke	2019-09-29 19:09:00	14.762	6.698	66.0823	0	66.0823	2019-09-29
Dyke	2019-09-29 19:19:00	14.728	6.735	66.3984	0	66.3984	2019-09-29
Dyke	2019-09-29 19:29:00	14.685	6.773	66.7107	0	66.7107	2019-09-29
Dyke	2019-09-29 19:39:00	14.633	6.781	66.7141	0	66.7141	2019-09-29
Dyke	2019-09-29 19:49:00	14.564	6.799	66.791	0	66.791	2019-09-29
Dyke	2019-09-29 19:59:00	14.581	6.789	66.7174	0	66.7174	2019-09-29
Dyke	2019-09-29 20:09:00	14.52	6.797	66.7074	0	66.7074	2019-09-29
Dyke	2019-09-29 20:19:00	14.52	6.762	66.364	0	66.364	2019-09-29
Dyke	2019-09-29 20:29:00	14.52	6.76	66.3443	0	66.3443	2019-09-29
Dyke	2019-09-29 20:39:00	14.512	6.743	66.166	0	66.166	2019-09-29
Dyke	2019-09-29 20:49:00	14.434	6.747	66.0928	0	66.0928	2019-09-29
Dyke	2019-09-29 20:59:00	14.451	6.71	65.7547	0	65.7547	2019-09-29
Dyke	2019-09-29 21:09:00	14.443	6.68	65.4493	0	65.4493	2019-09-29
Dyke	2019-09-29 21:19:00	14.417	6.668	65.2947	0	65.2947	2019-09-29
Dyke	2019-09-29 21:29:00	14.425	6.635	64.9829	0	64.9829	2019-09-29
Dyke	2019-09-29 21:39:00	14.399	6.611	64.7112	0	64.7112	2019-09-29
Dyke	2019-09-29 21:49:00	14.365	6.59	64.4578	0	64.4578	2019-09-29
Dyke	2019-09-29 21:59:00	14.339	6.6	64.519	0	64.519	2019-09-29
Dyke	2019-09-29 22:09:00	14.321	6.564	64.1418	0	64.1418	2019-09-29
Dyke	2019-09-29 22:19:00	14.321	6.518	63.6923	0	63.6923	2019-09-29
Dyke	2019-09-29 22:29:00	14.269	6.505	63.4931	0	63.4931	2019-09-29
Dyke	2019-09-29 22:39:00	14.295	6.475	63.2362	0	63.2362	2019-09-29
Dyke	2019-09-29 22:49:00	14.252	6.452	62.9524	0	62.9524	2019-09-29
Dyke	2019-09-29 22:59:00	14.2	6.456	62.9198	0	62.9198	2019-09-29
Dyke	2019-09-29 23:09:00	14.2	6.402	62.3935	0	62.3935	2019-09-29
Dyke	2019-09-29 23:19:00	14.209	6.353	61.9282	0	61.9282	2019-09-29
Dyke	2019-09-29 23:29:00	14.174	6.379	62.134	0	62.134	2019-09-29
Dyke	2019-09-29 23:39:00	14.157	6.345	61.7798	0	61.7798	2019-09-29
Dyke	2019-09-29 23:49:00	14.165	6.296	61.3134	0	61.3134	2019-09-29
Dyke	2019-09-29 23:59:00	14.13	6.277	61.0816	0	61.0816	2019-09-29
Dyke	2019-09-30 00:09:00	14.191	6.241	60.8124	0	60.8124	2019-09-30
Dyke	2019-09-30 00:19:00	14.148	6.25	60.8428	0	60.8428	2019-09-30
Dyke	2019-09-30 00:29:00	14.096	6.223	60.511	0	60.511	2019-09-30
Dyke	2019-09-30 00:39:00	14.087	6.137	59.663	0	59.663	2019-09-30
Dyke	2019-09-30 00:49:00	14.078	6.082	59.1166	0	59.1166	2019-09-30
Dyke	2019-09-30 00:59:00	14.07	6.045	58.7466	0	58.7466	2019-09-30
Dyke	2019-09-30 01:09:00	14.018	6.087	59.0873	0	59.0873	2019-09-30
Dyke	2019-09-30 01:19:00	14	6.051	58.7147	0	58.7147	2019-09-30
Dyke	2019-09-30 01:29:00	13.991	6.055	58.7419	0	58.7419	2019-09-30
Dyke	2019-09-30 01:39:00	14	6.058	58.7826	0	58.7826	2019-09-30
Dyke	2019-09-30 01:49:00	13.965	5.992	58.0975	0	58.0975	2019-09-30
Dyke	2019-09-30 01:59:00	13.939	5.93	57.4635	0	57.4635	2019-09-30
Dyke	2019-09-30 02:09:00	13.939	5.92	57.3666	0	57.3666	2019-09-30
Dyke	2019-09-30 02:19:00	13.939	5.899	57.1631	0	57.1631	2019-09-30
Dyke	2019-09-30 02:29:00	13.913	5.882	56.9658	0	56.9658	2019-09-30
Dyke	2019-09-30 02:39:00	13.913	5.86	56.7527	0	56.7527	2019-09-30
Dyke	2019-09-30 02:49:00	13.87	5.901	57.0957	0	57.0957	2019-09-30
Dyke	2019-09-30 02:59:00	13.896	5.852	56.654	0	56.654	2019-09-30
Dyke	2019-09-30 03:09:00	13.878	5.8	56.1284	0	56.1284	2019-09-30
Dyke	2019-09-30 03:19:00	13.878	5.801	56.1381	0	56.1381	2019-09-30
Dyke	2019-09-30 03:29:00	13.852	5.776	55.8641	0	55.8641	2019-09-30
Dyke	2019-09-30 03:39:00	13.852	5.761	55.7191	0	55.7191	2019-09-30
Dyke	2019-09-30 03:49:00	13.844	5.697	55.0904	0	55.0904	2019-09-30
Dyke	2019-09-30 03:59:00	13.8	5.645	54.5346	0	54.5346	2019-09-30
Dyke	2019-09-30 04:09:00	13.817	5.609	54.2072	0	54.2072	2019-09-30
Dyke	2019-09-30 04:19:00	13.756	5.57	53.7579	0	53.7579	2019-09-30
Dyke	2019-09-30 04:29:00	13.669	5.682	54.7337	0	54.7337	2019-09-30
Dyke	2019-09-30 04:39:00	13.748	5.666	54.6748	0	54.6748	2019-09-30
Dyke	2019-09-30 04:49:00	13.634	5.64	54.2871	0	54.2871	2019-09-30
Dyke	2019-09-30 04:59:00	13.582	5.628	54.1093	0	54.1093	2019-09-30
Dyke	2019-09-30 05:09:00	13.617	5.592	53.8048	0	53.8048	2019-09-30
Dyke	2019-09-30 05:19:00	13.564	5.593	53.7514	0	53.7514	2019-09-30
Dyke	2019-09-30 05:29:00	13.591	5.561	53.4758	0	53.4758	2019-09-30
Dyke	2019-09-30 05:39:00	13.582	5.512	52.9941	0	52.9941	2019-09-30
Dyke	2019-09-30 05:49:00	13.547	5.506	52.8954	0	52.8954	2019-09-30
Dyke	2019-09-30 05:59:00	13.521	5.39	51.7512	0	51.7512	2019-09-30
Dyke	2019-09-30 06:09:00	13.468	5.463	52.3905	0	52.3905	2019-09-30
Dyke	2019-09-30 06:19:00	13.468	5.414	51.9206	0	51.9206	2019-09-30
Dyke	2019-09-30 06:29:00	13.416	5.411	51.832	0	51.832	2019-09-30
Dyke	2019-09-30 06:39:00	13.337	5.451	52.1237	0	52.1237	2019-09-30
Dyke	2019-09-30 06:49:00	13.355	5.421	51.8576	0	51.8576	2019-09-30
Dyke	2019-09-30 06:59:00	13.398	5.337	51.1028	0	51.1028	2019-09-30
Dyke	2019-09-30 07:09:00	13.346	5.373	51.3881	0	51.3881	2019-09-30
Dyke	2019-09-30 07:19:00	13.328	5.344	51.0903	0	51.0903	2019-09-30
Dyke	2019-09-30 07:29:00	13.258	5.357	51.135	0	51.135	2019-09-30
Dyke	2019-09-30 07:39:00	13.267	5.34	50.9829	0	50.9829	2019-09-30
Dyke	2019-09-30 07:49:00	13.249	5.311	50.6857	0	50.6857	2019-09-30
Dyke	2019-09-30 07:59:00	13.188	5.364	51.1221	0	51.1221	2019-09-30
Dyke	2019-09-30 08:09:00	13.206	5.132	48.9306	0	48.9306	2019-09-30
Dyke	2019-09-30 08:19:00	13.179	5.271	50.2256	0	50.2256	2019-09-30
Dyke	2019-09-30 08:29:00	13.153	5.26	50.0918	0	50.0918	2019-09-30
Dyke	2019-09-30 08:39:00	13.188	5.275	50.2738	0	50.2738	2019-09-30
Dyke	2019-09-30 08:49:00	13.162	5.258	50.0828	0	50.0828	2019-09-30
Dyke	2019-09-30 08:59:00	13.17	5.233	49.8535	0	49.8535	2019-09-30
Dyke	2019-09-30 09:09:00	13.135	5.245	49.9289	0	49.9289	2019-09-30
Dyke	2019-09-30 09:19:00	13.214	5.205	49.6354	0	49.6354	2019-09-30
Dyke	2019-09-30 09:29:00	13.153	5.186	49.3871	0	49.3871	2019-09-30
Dyke	2019-09-30 09:39:00	13.188	5.165	49.2255	0	49.2255	2019-09-30
Dyke	2019-09-30 09:49:00	13.188	5.148	49.0634	0	49.0634	2019-09-30
Dyke	2019-09-30 09:59:00	13.241	5.16	49.2359	0	49.2359	2019-09-30
Dyke	2019-09-30 10:09:00	13.214	5.167	49.273	0	49.273	2019-09-30
Dyke	2019-09-30 10:19:00	13.258	5.156	49.2163	0	49.2163	2019-09-30
Dyke	2019-09-30 10:29:00	13.223	5.138	49.0063	0	49.0063	2019-09-30
Dyke	2019-09-30 10:39:00	13.197	5.14	48.997	0	48.997	2019-09-30
Dyke	2019-09-30 10:49:00	13.206	5.098	48.6064	0	48.6064	2019-09-30
Dyke	2019-09-30 10:59:00	13.214	5.148	49.0919	0	49.0919	2019-09-30
Dyke	2019-09-30 11:09:00	13.249	5.098	48.6529	0	48.6529	2019-09-30
Dyke	2019-09-30 11:19:00	13.241	5.096	48.6252	0	48.6252	2019-09-30
Dyke	2019-09-30 11:29:00	13.214	5.072	48.3671	0	48.3671	2019-09-30
Dyke	2019-09-30 11:39:00	13.232	5.007	47.7664	0	47.7664	2019-09-30
Dyke	2019-09-30 11:49:00	13.179	5.066	48.2723	0	48.2723	2019-09-30
Dyke	2019-09-30 11:59:00	13.293	4.992	47.688	0	47.688	2019-09-30
Dyke	2019-09-30 12:09:00	13.293	4.899	46.7996	0	46.7996	2019-09-30
Dyke	2019-09-30 12:19:00	13.258	4.851	46.305	0	46.305	2019-09-30
Dyke	2019-09-30 12:29:00	13.346	4.87	46.5774	0	46.5774	2019-09-30
Dyke	2019-09-30 12:39:00	13.276	4.895	46.7437	0	46.7437	2019-09-30
Dyke	2019-09-30 12:49:00	13.293	4.922	47.0193	0	47.0193	2019-09-30
Dyke	2019-09-30 12:59:00	13.311	4.937	47.1814	0	47.1814	2019-09-30
Dyke	2019-09-30 13:09:00	13.337	4.935	47.1896	0	47.1896	2019-09-30
Dyke	2019-09-30 13:19:00	13.267	4.94	47.1639	0	47.1639	2019-09-30
Dyke	2019-09-30 13:29:00	13.311	4.981	47.6019	0	47.6019	2019-09-30
Dyke	2019-09-30 13:39:00	13.328	4.96	47.4192	0	47.4192	2019-09-30
Dyke	2019-09-30 13:49:00	13.381	4.92	47.0922	0	47.0922	2019-09-30
Dyke	2019-09-30 13:59:00	13.319	4.928	47.1038	0	47.1038	2019-09-30
Dyke	2019-09-30 14:09:00	13.407	4.859	46.5351	0	46.5351	2019-09-30
Dyke	2019-09-30 14:19:00	13.319	4.871	46.559	0	46.559	2019-09-30
Dyke	2019-09-30 14:29:00	13.328	4.864	46.5014	0	46.5014	2019-09-30
Dyke	2019-09-30 14:39:00	13.363	4.82	46.1166	0	46.1166	2019-09-30
Dyke	2019-09-30 14:49:00	13.39	4.788	45.8379	0	45.8379	2019-09-30
Dyke	2019-09-30 14:59:00	13.355	4.779	45.7162	0	45.7162	2019-09-30
Dyke	2019-09-30 15:09:00	13.39	4.559	43.6455	0	43.6455	2019-09-30
Dyke	2019-09-30 15:19:00	13.363	4.549	43.5237	0	43.5237	2019-09-30
Dyke	2019-09-30 15:29:00	13.355	4.647	44.4534	0	44.4534	2019-09-30
Dyke	2019-09-30 15:39:00	13.355	4.697	44.9317	0	44.9317	2019-09-30
Dyke	2019-09-30 15:49:00	13.416	4.678	44.8106	0	44.8106	2019-09-30
Dyke	2019-09-30 15:59:00	13.372	4.692	44.9009	0	44.9009	2019-09-30
Dyke	2019-09-30 16:09:00	13.381	4.671	44.7088	0	44.7088	2019-09-30
Dyke	2019-09-30 16:19:00	13.372	4.6	44.0205	0	44.0205	2019-09-30
Dyke	2019-09-30 16:29:00	13.407	4.596	44.0164	0	44.0164	2019-09-30
Dyke	2019-09-30 16:39:00	13.363	4.609	44.0978	0	44.0978	2019-09-30
Dyke	2019-09-30 16:49:00	13.372	4.721	45.1784	0	45.1784	2019-09-30
Dyke	2019-09-30 16:59:00	13.407	4.778	45.7594	0	45.7594	2019-09-30
Dyke	2019-09-30 17:09:00	13.442	4.703	45.0761	0	45.0761	2019-09-30
Dyke	2019-09-30 17:19:00	13.425	4.684	44.8771	0	44.8771	2019-09-30
Dyke	2019-09-30 17:29:00	13.433	4.706	45.0958	0	45.0958	2019-09-30
Dyke	2019-09-30 17:39:00	13.442	4.802	46.025	0	46.025	2019-09-30
Dyke	2019-09-30 17:49:00	13.416	4.819	46.1613	0	46.1613	2019-09-30
Dyke	2019-09-30 17:59:00	13.416	4.761	45.6057	0	45.6057	2019-09-30
Dyke	2019-09-30 18:09:00	13.433	4.789	45.8912	0	45.8912	2019-09-30
Dyke	2019-09-30 18:19:00	13.433	4.75	45.5175	0	45.5175	2019-09-30
Dyke	2019-09-30 18:29:00	13.46	4.695	45.0174	0	45.0174	2019-09-30
Dyke	2019-09-30 18:39:00	13.398	4.656	44.5821	0	44.5821	2019-09-30
Dyke	2019-09-30 18:49:00	13.46	4.606	44.164	0	44.164	2019-09-30
Dyke	2019-09-30 18:59:00	13.442	4.516	43.2838	0	43.2838	2019-09-30
Dyke	2019-09-30 19:09:00	13.486	4.341	41.6471	0	41.6471	2019-09-30
Dyke	2019-09-30 19:19:00	13.477	4.325	41.4853	0	41.4853	2019-09-30
Dyke	2019-09-30 19:29:00	13.538	4.25	40.821	0	40.821	2019-09-30
Dyke	2019-09-30 19:39:00	13.468	4.184	40.1248	0	40.1248	2019-09-30
Dyke	2019-09-30 19:49:00	13.512	4.174	40.068	0	40.068	2019-09-30
Dyke	2019-09-30 19:59:00	13.477	4.105	39.3751	0	39.3751	2019-09-30
Dyke	2019-09-30 20:09:00	13.573	4.058	39.0071	0	39.0071	2019-09-30
Dyke	2019-09-30 20:19:00	13.599	3.998	38.4525	0	38.4525	2019-09-30
Dyke	2019-09-30 20:29:00	13.547	3.859	37.0729	0	37.0729	2019-09-30
Dyke	2019-09-30 20:39:00	13.538	3.747	35.9897	0	35.9897	2019-09-30
Dyke	2019-09-30 20:49:00	13.538	3.712	35.6536	0	35.6536	2019-09-30
Dyke	2019-09-30 20:59:00	13.599	3.614	34.7592	0	34.7592	2019-09-30
Dyke	2019-09-30 21:09:00	13.582	3.589	34.5057	0	34.5057	2019-09-30
Dyke	2019-09-30 21:19:00	13.556	3.59	34.4955	0	34.4955	2019-09-30
Dyke	2019-09-30 21:29:00	13.591	3.54	34.0414	0	34.0414	2019-09-30
Dyke	2019-09-30 21:39:00	13.573	3.546	34.0855	0	34.0855	2019-09-30
Dyke	2019-09-30 21:49:00	13.529	3.597	34.5421	0	34.5421	2019-09-30
Dyke	2019-09-30 21:59:00	13.669	3.653	35.1887	0	35.1887	2019-09-30
Dyke	2019-09-30 22:09:00	13.582	3.749	36.044	0	36.044	2019-09-30
Dyke	2019-09-30 22:19:00	13.599	3.769	36.25	0	36.25	2019-09-30
Dyke	2019-09-30 22:29:00	13.582	3.785	36.3902	0	36.3902	2019-09-30
Dyke	2019-09-30 22:39:00	13.556	3.731	35.8503	0	35.8503	2019-09-30
Dyke	2019-09-30 22:49:00	13.678	3.489	33.6156	0	33.6156	2019-09-30
Dyke	2019-09-30 22:59:00	13.722	3.258	31.4205	0	31.4205	2019-09-30
Dyke	2019-09-30 23:09:00	13.713	3.066	29.5629	0	29.5629	2019-09-30
Dyke	2019-09-30 23:19:00	13.913	3.926	38.0224	0	38.0224	2019-09-30
Dyke	2019-09-30 23:29:00	13.904	5.169	50.0506	0	50.0506	2019-09-30
Dyke	2019-09-30 23:39:00	13.957	5.492	53.2402	0	53.2402	2019-09-30
Dyke	2019-09-30 23:49:00	13.965	5.682	55.0918	0	55.0918	2019-09-30
Dyke	2019-09-30 23:59:00	13.852	5.831	56.3961	0	56.3961	2019-09-30
Dyke	2019-10-01 00:09:00	13.896	5.958	57.6802	0	57.6802	2019-10-01
Dyke	2019-10-01 00:19:00	13.844	6.088	58.8714	0	58.8714	2019-10-01
Dyke	2019-10-01 00:29:00	13.835	6.258	60.5033	0	60.5033	2019-10-01
Dyke	2019-10-01 00:39:00	13.87	6.396	61.8852	0	61.8852	2019-10-01
Dyke	2019-10-01 00:49:00	13.878	6.564	63.5219	0	63.5219	2019-10-01
Dyke	2019-10-01 00:59:00	13.913	6.727	65.1494	0	65.1494	2019-10-01
Dyke	2019-10-01 01:09:00	13.922	6.804	65.9082	0	65.9082	2019-10-01
Dyke	2019-10-01 01:19:00	13.904	6.842	66.25	0	66.25	2019-10-01
Dyke	2019-10-01 01:29:00	13.974	6.842	66.3521	0	66.3521	2019-10-01
Dyke	2019-10-01 01:39:00	14	6.9	66.9528	0	66.9528	2019-10-01
Dyke	2019-10-01 01:49:00	14.018	6.954	67.5034	0	67.5034	2019-10-01
Dyke	2019-10-01 01:59:00	14.035	6.952	67.5092	0	67.5092	2019-10-01
Dyke	2019-10-01 02:09:00	14.07	6.943	67.4736	0	67.4736	2019-10-01
Dyke	2019-10-01 02:19:00	14.07	6.929	67.3375	0	67.3375	2019-10-01
Dyke	2019-10-01 02:29:00	14.122	6.906	67.1906	0	67.1906	2019-10-01
Dyke	2019-10-01 02:39:00	14.087	6.898	67.0613	0	67.0613	2019-10-01
Dyke	2019-10-01 02:49:00	14.096	6.887	66.9676	0	66.9676	2019-10-01
Dyke	2019-10-01 02:59:00	14.139	6.887	67.0307	0	67.0307	2019-10-01
Dyke	2019-10-01 03:09:00	14.13	6.892	67.0661	0	67.0661	2019-10-01
Dyke	2019-10-01 03:19:00	14.165	6.842	66.6307	0	66.6307	2019-10-01
Dyke	2019-10-01 03:29:00	14.122	6.857	66.7139	0	66.7139	2019-10-01
Dyke	2019-10-01 03:39:00	14.096	5.761	56.0186	0	56.0186	2019-10-01
Dyke	2019-10-01 03:49:00	14.122	6.814	66.2955	0	66.2955	2019-10-01
Dyke	2019-10-01 03:59:00	14.165	6.811	66.3288	0	66.3288	2019-10-01
Dyke	2019-10-01 04:09:00	14.104	6.807	66.2013	0	66.2013	2019-10-01
Dyke	2019-10-01 04:19:00	14.113	6.72	65.368	0	65.368	2019-10-01
Dyke	2019-10-01 04:29:00	14.096	6.78	65.9271	0	65.9271	2019-10-01
Dyke	2019-10-01 04:39:00	14.087	6.758	65.7002	0	65.7002	2019-10-01
Dyke	2019-10-01 04:49:00	14.078	6.738	65.4929	0	65.4929	2019-10-01
Dyke	2019-10-01 04:59:00	14.148	6.692	65.1456	0	65.1456	2019-10-01
Dyke	2019-10-01 05:09:00	14.061	6.693	65.0312	0	65.0312	2019-10-01
Dyke	2019-10-01 05:19:00	14.061	6.685	64.9535	0	64.9535	2019-10-01
Dyke	2019-10-01 05:29:00	14.035	6.68	64.8679	0	64.8679	2019-10-01
Dyke	2019-10-01 05:39:00	14.096	6.648	64.6436	0	64.6436	2019-10-01
Dyke	2019-10-01 05:49:00	14.018	6.65	64.5525	0	64.5525	2019-10-01
Dyke	2019-10-01 05:59:00	14.07	6.626	64.3929	0	64.3929	2019-10-01
Dyke	2019-10-01 06:09:00	14.087	6.583	63.9989	0	63.9989	2019-10-01
Dyke	2019-10-01 06:19:00	14.018	6.573	63.805	0	63.805	2019-10-01
Dyke	2019-10-01 06:29:00	14.087	6.523	63.4156	0	63.4156	2019-10-01
Dyke	2019-10-01 06:39:00	14.052	6.517	63.3086	0	63.3086	2019-10-01
Dyke	2019-10-01 06:49:00	14.07	6.498	63.149	0	63.149	2019-10-01
Dyke	2019-10-01 06:59:00	14.018	6.465	62.7566	0	62.7566	2019-10-01
Dyke	2019-10-01 07:09:00	14.026	6.421	62.3405	0	62.3405	2019-10-01
Dyke	2019-10-01 07:19:00	14.018	6.391	62.0383	0	62.0383	2019-10-01
Dyke	2019-10-01 07:29:00	14.009	6.404	62.1522	0	62.1522	2019-10-01
Dyke	2019-10-01 07:39:00	13.957	6.399	62.0328	0	62.0328	2019-10-01
Dyke	2019-10-01 07:49:00	14.026	6.33	61.457	0	61.457	2019-10-01
Dyke	2019-10-01 07:59:00	13.991	6.301	61.1284	0	61.1284	2019-10-01
Dyke	2019-10-01 08:09:00	13.965	6.332	61.3941	0	61.3941	2019-10-01
Dyke	2019-10-01 08:19:00	13.957	6.329	61.3542	0	61.3542	2019-10-01
Dyke	2019-10-01 08:29:00	14	6.315	61.2763	0	61.2763	2019-10-01
Dyke	2019-10-01 08:39:00	13.983	6.315	61.2535	0	61.2535	2019-10-01
Dyke	2019-10-01 08:49:00	13.939	6.351	61.5431	0	61.5431	2019-10-01
Dyke	2019-10-01 08:59:00	14.018	6.356	61.6986	0	61.6986	2019-10-01
Dyke	2019-10-01 09:09:00	14	6.135	59.5297	0	59.5297	2019-10-01
Dyke	2019-10-01 09:19:00	13.974	6.376	61.8329	0	61.8329	2019-10-01
Dyke	2019-10-01 09:29:00	13.991	6.401	62.0985	0	62.0985	2019-10-01
Dyke	2019-10-01 09:39:00	13.965	6.413	62.1794	0	62.1794	2019-10-01
Dyke	2019-10-01 09:49:00	13.957	6.422	62.2558	0	62.2558	2019-10-01
Dyke	2019-10-01 09:59:00	13.983	6.428	62.3495	0	62.3495	2019-10-01
Dyke	2019-10-01 10:09:00	13.965	6.44	62.4412	0	62.4412	2019-10-01
Dyke	2019-10-01 10:19:00	13.965	6.396	62.0146	0	62.0146	2019-10-01
Dyke	2019-10-01 10:29:00	13.974	6.468	62.7251	0	62.7251	2019-10-01
Dyke	2019-10-01 10:39:00	13.974	6.486	62.8997	0	62.8997	2019-10-01
Dyke	2019-10-01 10:49:00	13.983	6.499	63.0382	0	63.0382	2019-10-01
Dyke	2019-10-01 10:59:00	13.991	6.531	63.3597	0	63.3597	2019-10-01
Dyke	2019-10-01 11:09:00	13.939	6.54	63.3746	0	63.3746	2019-10-01
Dyke	2019-10-01 11:19:00	14.026	6.494	63.0492	0	63.0492	2019-10-01
Dyke	2019-10-01 11:29:00	14.087	6.544	63.6198	0	63.6198	2019-10-01
Dyke	2019-10-01 11:39:00	14.07	6.659	64.7136	0	64.7136	2019-10-01
Dyke	2019-10-01 11:49:00	14.113	6.751	65.6696	0	65.6696	2019-10-01
Dyke	2019-10-01 11:59:00	14.13	6.867	66.8229	0	66.8229	2019-10-01
Dyke	2019-10-01 12:09:00	14.113	6.994	68.0333	0	68.0333	2019-10-01
Dyke	2019-10-01 12:19:00	14.183	7.107	69.2386	0	69.2386	2019-10-01
Dyke	2019-10-01 12:29:00	14.165	7.198	70.0976	0	70.0976	2019-10-01
Dyke	2019-10-01 12:39:00	14.269	7.202	70.2963	0	70.2963	2019-10-01
Dyke	2019-10-01 12:49:00	14.226	7.245	70.6495	0	70.6495	2019-10-01
Dyke	2019-10-01 12:59:00	14.217	7.255	70.7331	0	70.7331	2019-10-01
Dyke	2019-10-01 13:09:00	14.252	7.21	70.3482	0	70.3482	2019-10-01
Dyke	2019-10-01 13:19:00	14.252	7.173	69.9872	0	69.9872	2019-10-01
Dyke	2019-10-01 13:29:00	14.269	7.126	69.5545	0	69.5545	2019-10-01
Dyke	2019-10-01 13:39:00	14.235	7.078	69.0346	0	69.0346	2019-10-01
Dyke	2019-10-01 13:49:00	14.287	7.036	68.703	0	68.703	2019-10-01
Dyke	2019-10-01 13:59:00	14.295	7.011	68.4709	0	68.4709	2019-10-01
Dyke	2019-10-01 14:09:00	14.33	6.987	68.2887	0	68.2887	2019-10-01
Dyke	2019-10-01 14:19:00	14.33	6.957	67.9955	0	67.9955	2019-10-01
Dyke	2019-10-01 14:29:00	14.382	6.895	67.4661	0	67.4661	2019-10-01
Dyke	2019-10-01 14:39:00	14.391	6.855	67.0878	0	67.0878	2019-10-01
Dyke	2019-10-01 14:49:00	14.356	6.867	67.154	0	67.154	2019-10-01
Dyke	2019-10-01 14:59:00	14.33	6.863	67.0768	0	67.0768	2019-10-01
Dyke	2019-10-01 15:09:00	14.339	6.821	66.6794	0	66.6794	2019-10-01
Dyke	2019-10-01 15:19:00	14.287	6.82	66.5939	0	66.5939	2019-10-01
Dyke	2019-10-01 15:29:00	14.295	6.799	66.4005	0	66.4005	2019-10-01
Dyke	2019-10-01 15:39:00	14.304	6.782	66.2475	0	66.2475	2019-10-01
Dyke	2019-10-01 15:49:00	14.33	6.751	65.9821	0	65.9821	2019-10-01
Dyke	2019-10-01 15:59:00	14.304	6.751	65.9446	0	65.9446	2019-10-01
Dyke	2019-10-01 16:09:00	14.313	6.723	65.6841	0	65.6841	2019-10-01
Dyke	2019-10-01 16:19:00	14.304	6.698	65.4269	0	65.4269	2019-10-01
Dyke	2019-10-01 16:29:00	14.269	6.686	65.2598	0	65.2598	2019-10-01
Dyke	2019-10-01 16:39:00	14.243	6.663	64.9983	0	64.9983	2019-10-01
Dyke	2019-10-01 16:49:00	14.287	6.623	64.6703	0	64.6703	2019-10-01
Dyke	2019-10-01 16:59:00	14.217	6.602	64.3666	0	64.3666	2019-10-01
Dyke	2019-10-01 17:09:00	14.2	6.571	64.0406	0	64.0406	2019-10-01
Dyke	2019-10-01 17:19:00	14.174	6.545	63.7509	0	63.7509	2019-10-01
Dyke	2019-10-01 17:29:00	14.209	6.5	63.3611	0	63.3611	2019-10-01
Dyke	2019-10-01 17:39:00	14.174	6.45	62.8256	0	62.8256	2019-10-01
Dyke	2019-10-01 17:49:00	14.165	6.433	62.6476	0	62.6476	2019-10-01
Dyke	2019-10-01 17:59:00	14.096	6.392	62.1543	0	62.1543	2019-10-01
Dyke	2019-10-01 18:09:00	14.157	6.33	61.6338	0	61.6338	2019-10-01
Dyke	2019-10-01 18:19:00	14.139	6.3	61.3175	0	61.3175	2019-10-01
Dyke	2019-10-01 18:29:00	14.104	6.314	61.4066	0	61.4066	2019-10-01
Dyke	2019-10-01 18:39:00	14.061	6.252	60.7463	0	60.7463	2019-10-01
Dyke	2019-10-01 18:49:00	14.044	6.198	60.1992	0	60.1992	2019-10-01
Dyke	2019-10-01 18:59:00	14	6.192	60.0828	0	60.0828	2019-10-01
Dyke	2019-10-01 19:09:00	14.009	6.17	59.8812	0	59.8812	2019-10-01
Dyke	2019-10-01 19:19:00	13.983	6.127	59.4299	0	59.4299	2019-10-01
Dyke	2019-10-01 19:29:00	14	6.054	58.7438	0	58.7438	2019-10-01
Dyke	2019-10-01 19:39:00	13.904	6.053	58.6103	0	58.6103	2019-10-01
Dyke	2019-10-01 19:49:00	13.878	5.99	57.9671	0	57.9671	2019-10-01
Dyke	2019-10-01 19:59:00	13.896	5.942	57.5253	0	57.5253	2019-10-01
Dyke	2019-10-01 20:09:00	13.835	5.899	57.0324	0	57.0324	2019-10-01
Dyke	2019-10-01 20:19:00	13.878	5.832	56.4381	0	56.4381	2019-10-01
Dyke	2019-10-01 20:29:00	13.887	5.844	56.5654	0	56.5654	2019-10-01
Dyke	2019-10-01 20:39:00	13.861	5.829	56.3879	0	56.3879	2019-10-01
Dyke	2019-10-01 20:49:00	13.835	5.816	56.23	0	56.23	2019-10-01
Dyke	2019-10-01 20:59:00	13.844	5.761	55.7093	0	55.7093	2019-10-01
Dyke	2019-10-01 21:09:00	13.8	5.723	55.2882	0	55.2882	2019-10-01
Dyke	2019-10-01 21:19:00	13.783	5.731	55.3447	0	55.3447	2019-10-01
Dyke	2019-10-01 21:29:00	13.765	5.696	54.9849	0	54.9849	2019-10-01
Dyke	2019-10-01 21:39:00	13.748	5.676	54.7713	0	54.7713	2019-10-01
Dyke	2019-10-01 21:49:00	13.783	5.607	54.1472	0	54.1472	2019-10-01
Dyke	2019-10-01 21:59:00	13.66	5.524	53.2011	0	53.2011	2019-10-01
Dyke	2019-10-01 22:09:00	13.66	5.566	53.6056	0	53.6056	2019-10-01
Dyke	2019-10-01 22:19:00	13.556	5.586	53.6746	0	53.6746	2019-10-01
Dyke	2019-10-01 22:29:00	13.608	5.559	53.4767	0	53.4767	2019-10-01
Dyke	2019-10-01 22:39:00	13.564	5.512	52.973	0	52.973	2019-10-01
Dyke	2019-10-01 22:49:00	13.564	5.414	52.0311	0	52.0311	2019-10-01
Dyke	2019-10-01 22:59:00	13.495	5.399	51.8078	0	51.8078	2019-10-01
Dyke	2019-10-01 23:09:00	13.503	5.363	51.4714	0	51.4714	2019-10-01
Dyke	2019-10-01 23:19:00	13.398	5.367	51.39	0	51.39	2019-10-01
Dyke	2019-10-01 23:29:00	13.416	5.305	50.8167	0	50.8167	2019-10-01
Dyke	2019-10-01 23:39:00	13.407	5.3	50.7586	0	50.7586	2019-10-01
Dyke	2019-10-01 23:49:00	13.293	5.302	50.6494	0	50.6494	2019-10-01
Dyke	2019-10-01 23:59:00	13.311	5.254	50.2109	0	50.2109	2019-10-01
Dyke	2019-10-02 00:09:00	13.214	5.274	50.2934	0	50.2934	2019-10-02
Dyke	2019-10-02 00:19:00	13.214	5.344	50.9609	0	50.9609	2019-10-02
Dyke	2019-10-02 00:29:00	13.127	5.382	51.2239	0	51.2239	2019-10-02
Dyke	2019-10-02 00:39:00	13.074	5.464	51.9429	0	51.9429	2019-10-02
Dyke	2019-10-02 00:49:00	13.091	5.523	52.5237	0	52.5237	2019-10-02
Dyke	2019-10-02 00:59:00	13.056	5.562	52.8533	0	52.8533	2019-10-02
Dyke	2019-10-02 01:09:00	13.021	5.642	53.5716	0	53.5716	2019-10-02
Dyke	2019-10-02 01:19:00	12.986	5.748	54.5354	0	54.5354	2019-10-02
Dyke	2019-10-02 01:29:00	12.907	5.784	54.7801	0	54.7801	2019-10-02
Dyke	2019-10-02 01:39:00	12.836	5.933	56.102	0	56.102	2019-10-02
Dyke	2019-10-02 01:49:00	12.828	5.979	56.5268	0	56.5268	2019-10-02
Dyke	2019-10-02 01:59:00	12.801	6.065	57.3052	0	57.3052	2019-10-02
Dyke	2019-10-02 02:09:00	12.819	6.107	57.7253	0	57.7253	2019-10-02
Dyke	2019-10-02 02:19:00	12.748	6.152	58.0581	0	58.0581	2019-10-02
Dyke	2019-10-02 02:29:00	12.739	6.14	57.9331	0	57.9331	2019-10-02
Dyke	2019-10-02 02:39:00	12.704	6.156	58.0385	0	58.0385	2019-10-02
Dyke	2019-10-02 02:49:00	12.695	6.188	58.3284	0	58.3284	2019-10-02
Dyke	2019-10-02 02:59:00	12.695	6.212	58.5546	0	58.5546	2019-10-02
Dyke	2019-10-02 03:09:00	12.633	6.163	58.0118	0	58.0118	2019-10-02
Dyke	2019-10-02 03:19:00	12.58	6.138	57.7076	0	57.7076	2019-10-02
Dyke	2019-10-02 03:29:00	12.554	6.156	57.843	0	57.843	2019-10-02
Dyke	2019-10-02 03:39:00	12.554	6.067	57.0067	0	57.0067	2019-10-02
Dyke	2019-10-02 03:49:00	12.536	6.075	57.0587	0	57.0587	2019-10-02
Dyke	2019-10-02 03:59:00	12.501	6.07	56.9668	0	56.9668	2019-10-02
Dyke	2019-10-02 04:09:00	12.483	6.061	56.8593	0	56.8593	2019-10-02
Dyke	2019-10-02 04:19:00	12.439	6.095	57.1215	0	57.1215	2019-10-02
Dyke	2019-10-02 04:29:00	12.466	6.125	57.4376	0	57.4376	2019-10-02
Dyke	2019-10-02 04:39:00	12.395	6.138	57.4674	0	57.4674	2019-10-02
Dyke	2019-10-02 04:49:00	12.386	6.128	57.3621	0	57.3621	2019-10-02
Dyke	2019-10-02 04:59:00	12.288	6.14	57.3472	0	57.3472	2019-10-02
Dyke	2019-10-02 05:09:00	12.342	6.117	57.2022	0	57.2022	2019-10-02
Dyke	2019-10-02 05:19:00	12.333	6.064	56.695	0	56.695	2019-10-02
Dyke	2019-10-02 05:29:00	12.262	6.131	57.2294	0	57.2294	2019-10-02
Dyke	2019-10-02 05:39:00	12.208	6.096	56.8332	0	56.8332	2019-10-02
Dyke	2019-10-02 05:49:00	12.217	6.097	56.8541	0	56.8541	2019-10-02
Dyke	2019-10-02 05:59:00	12.217	6.074	56.6396	0	56.6396	2019-10-02
Dyke	2019-10-02 06:09:00	12.182	6.112	56.9488	0	56.9488	2019-10-02
Dyke	2019-10-02 06:19:00	12.084	6.116	56.8594	0	56.8594	2019-10-02
Dyke	2019-10-02 06:29:00	12.146	6.051	56.3344	0	56.3344	2019-10-02
Dyke	2019-10-02 06:39:00	12.048	6.056	56.2556	0	56.2556	2019-10-02
Dyke	2019-10-02 06:49:00	12.075	6.029	56.0392	0	56.0392	2019-10-02
Dyke	2019-10-02 06:59:00	12.013	6.042	56.0809	0	56.0809	2019-10-02
Dyke	2019-10-02 07:09:00	11.959	6.059	56.1697	0	56.1697	2019-10-02
Dyke	2019-10-02 07:19:00	11.942	6.061	56.1665	0	56.1665	2019-10-02
Dyke	2019-10-02 07:29:00	11.924	6.037	55.9211	0	55.9211	2019-10-02
Dyke	2019-10-02 07:39:00	11.951	5.996	55.5755	0	55.5755	2019-10-02
Dyke	2019-10-02 07:49:00	11.915	5.998	55.5485	0	55.5485	2019-10-02
Dyke	2019-10-02 07:59:00	11.915	5.988	55.4559	0	55.4559	2019-10-02
Dyke	2019-10-02 08:09:00	11.817	6.007	55.5077	0	55.5077	2019-10-02
Dyke	2019-10-02 08:19:00	11.817	6.004	55.4799	0	55.4799	2019-10-02
Dyke	2019-10-02 08:29:00	11.799	6.001	55.4294	0	55.4294	2019-10-02
Dyke	2019-10-02 08:39:00	11.772	6.015	55.5245	0	55.5245	2019-10-02
Dyke	2019-10-02 08:49:00	11.772	6.031	55.6722	0	55.6722	2019-10-02
Dyke	2019-10-02 08:59:00	11.754	6.052	55.8431	0	55.8431	2019-10-02
Dyke	2019-10-02 09:09:00	11.79	6.04	55.7782	0	55.7782	2019-10-02
Dyke	2019-10-02 09:19:00	11.772	6.029	55.6537	0	55.6537	2019-10-02
Dyke	2019-10-02 09:29:00	11.727	6.008	55.4029	0	55.4029	2019-10-02
Dyke	2019-10-02 09:39:00	11.719	5.98	55.1346	0	55.1346	2019-10-02
Dyke	2019-10-02 09:49:00	11.754	6.009	55.4463	0	55.4463	2019-10-02
Dyke	2019-10-02 09:59:00	11.727	6.114	56.3804	0	56.3804	2019-10-02
Dyke	2019-10-02 10:09:00	11.665	6.197	57.0648	0	57.0648	2019-10-02
Dyke	2019-10-02 10:19:00	11.71	5.979	55.1141	0	55.1141	2019-10-02
Dyke	2019-10-02 10:29:00	11.719	5.889	54.2956	0	54.2956	2019-10-02
Dyke	2019-10-02 10:39:00	11.701	5.909	54.4576	0	54.4576	2019-10-02
Dyke	2019-10-02 10:49:00	11.719	5.943	54.7935	0	54.7935	2019-10-02
Dyke	2019-10-02 10:59:00	11.817	6.01	55.5354	0	55.5354	2019-10-02
Dyke	2019-10-02 11:09:00	11.772	6.218	57.3984	0	57.3984	2019-10-02
Dyke	2019-10-02 11:19:00	11.745	6.406	59.0974	0	59.0974	2019-10-02
Dyke	2019-10-02 11:29:00	11.799	6.594	60.9068	0	60.9068	2019-10-02
Dyke	2019-10-02 11:39:00	11.79	6.799	62.7874	0	62.7874	2019-10-02
Dyke	2019-10-02 11:49:00	11.781	6.854	63.2823	0	63.2823	2019-10-02
Dyke	2019-10-02 11:59:00	11.754	6.977	64.3783	0	64.3783	2019-10-02
Dyke	2019-10-02 12:09:00	11.754	7.197	66.4083	0	66.4083	2019-10-02
Dyke	2019-10-02 12:19:00	11.772	7.376	68.0879	0	68.0879	2019-10-02
Dyke	2019-10-02 12:29:00	11.799	7.405	68.3978	0	68.3978	2019-10-02
Dyke	2019-10-02 12:39:00	11.844	7.509	69.4296	0	69.4296	2019-10-02
Dyke	2019-10-02 12:49:00	11.79	7.584	70.0367	0	70.0367	2019-10-02
Dyke	2019-10-02 12:59:00	11.844	7.611	70.3727	0	70.3727	2019-10-02
Dyke	2019-10-02 13:09:00	11.915	7.643	70.7831	0	70.7831	2019-10-02
Dyke	2019-10-02 13:19:00	11.959	7.675	71.1507	0	71.1507	2019-10-02
Dyke	2019-10-02 13:29:00	11.951	7.721	71.5641	0	71.5641	2019-10-02
Dyke	2019-10-02 13:39:00	11.959	7.743	71.7811	0	71.7811	2019-10-02
Dyke	2019-10-02 13:49:00	12.04	7.72	71.6999	0	71.6999	2019-10-02
Dyke	2019-10-02 13:59:00	11.933	7.674	71.0993	0	71.0993	2019-10-02
Dyke	2019-10-02 14:09:00	11.942	7.603	70.456	0	70.456	2019-10-02
Dyke	2019-10-02 14:19:00	11.951	7.704	71.4065	0	71.4065	2019-10-02
Dyke	2019-10-02 14:29:00	11.968	7.72	71.5825	0	71.5825	2019-10-02
Dyke	2019-10-02 14:39:00	11.977	7.697	71.3839	0	71.3839	2019-10-02
Dyke	2019-10-02 14:49:00	12.04	7.694	71.4584	0	71.4584	2019-10-02
Dyke	2019-10-02 14:59:00	12.084	7.684	71.4369	0	71.4369	2019-10-02
Dyke	2019-10-02 15:09:00	11.995	7.699	71.4317	0	71.4317	2019-10-02
Dyke	2019-10-02 15:19:00	11.986	7.693	71.3614	0	71.3614	2019-10-02
Dyke	2019-10-02 15:29:00	12.013	7.66	71.0989	0	71.0989	2019-10-02
Dyke	2019-10-02 15:39:00	11.951	7.713	71.49	0	71.49	2019-10-02
Dyke	2019-10-02 15:49:00	11.995	7.698	71.4224	0	71.4224	2019-10-02
Dyke	2019-10-02 15:59:00	12.031	7.69	71.4066	0	71.4066	2019-10-02
Dyke	2019-10-02 16:09:00	12.004	7.704	71.4927	0	71.4927	2019-10-02
Dyke	2019-10-02 16:19:00	12.004	7.692	71.3813	0	71.3813	2019-10-02
Dyke	2019-10-02 16:29:00	12.075	7.644	71.0505	0	71.0505	2019-10-02
Dyke	2019-10-02 16:39:00	12.093	7.639	71.033	0	71.033	2019-10-02
Dyke	2019-10-02 16:49:00	12.031	7.677	71.2859	0	71.2859	2019-10-02
Dyke	2019-10-02 16:59:00	12.084	7.62	70.8419	0	70.8419	2019-10-02
Dyke	2019-10-02 17:09:00	12.084	7.648	71.1022	0	71.1022	2019-10-02
Dyke	2019-10-02 17:19:00	12.084	7.766	72.1992	0	72.1992	2019-10-02
Dyke	2019-10-02 17:29:00	12.146	7.758	72.2264	0	72.2264	2019-10-02
Dyke	2019-10-02 17:39:00	12.111	7.785	72.4202	0	72.4202	2019-10-02
Dyke	2019-10-02 17:49:00	12.111	7.707	71.6946	0	71.6946	2019-10-02
Dyke	2019-10-02 17:59:00	12.128	7.605	70.7731	0	70.7731	2019-10-02
Dyke	2019-10-02 18:09:00	12.084	7.695	71.5391	0	71.5391	2019-10-02
Dyke	2019-10-02 18:19:00	12.146	7.656	71.2768	0	71.2768	2019-10-02
Dyke	2019-10-02 18:29:00	12.155	7.589	70.6675	0	70.6675	2019-10-02
Dyke	2019-10-02 18:39:00	12.111	7.571	70.4295	0	70.4295	2019-10-02
Dyke	2019-10-02 18:49:00	12.111	7.454	69.3411	0	69.3411	2019-10-02
Dyke	2019-10-02 18:59:00	12.146	7.394	68.8376	0	68.8376	2019-10-02
Dyke	2019-10-02 19:09:00	12.128	7.378	68.6606	0	68.6606	2019-10-02
Dyke	2019-10-02 19:19:00	12.102	7.321	68.09	0	68.09	2019-10-02
Dyke	2019-10-02 19:29:00	12.111	7.343	68.3085	0	68.3085	2019-10-02
Dyke	2019-10-02 19:39:00	12.111	7.291	67.8248	0	67.8248	2019-10-02
Dyke	2019-10-02 19:49:00	12.164	7.274	67.7481	0	67.7481	2019-10-02
Dyke	2019-10-02 19:59:00	12.173	7.259	67.6222	0	67.6222	2019-10-02
Dyke	2019-10-02 20:09:00	12.093	7.252	67.4344	0	67.4344	2019-10-02
Dyke	2019-10-02 20:19:00	12.146	7.164	66.6963	0	66.6963	2019-10-02
Dyke	2019-10-02 20:29:00	12.173	7.045	65.6286	0	65.6286	2019-10-02
Dyke	2019-10-02 20:39:00	12.208	6.872	64.0678	0	64.0678	2019-10-02
Dyke	2019-10-02 20:49:00	12.2	6.809	63.469	0	63.469	2019-10-02
Dyke	2019-10-02 20:59:00	12.111	6.776	63.034	0	63.034	2019-10-02
Dyke	2019-10-02 21:09:00	12.164	6.739	62.7652	0	62.7652	2019-10-02
Dyke	2019-10-02 21:19:00	12.164	6.671	62.1319	0	62.1319	2019-10-02
Dyke	2019-10-02 21:29:00	12.164	6.642	61.8618	0	61.8618	2019-10-02
Dyke	2019-10-02 21:39:00	12.191	6.647	61.9463	0	61.9463	2019-10-02
Dyke	2019-10-02 21:49:00	12.12	6.586	61.279	0	61.279	2019-10-02
Dyke	2019-10-02 21:59:00	12.182	6.483	60.4056	0	60.4056	2019-10-02
Dyke	2019-10-02 22:09:00	12.173	6.381	59.443	0	59.443	2019-10-02
Dyke	2019-10-02 22:19:00	12.217	6.314	58.8776	0	58.8776	2019-10-02
Dyke	2019-10-02 22:29:00	12.137	6.295	58.594	0	58.594	2019-10-02
Dyke	2019-10-02 22:39:00	12.146	6.267	58.3453	0	58.3453	2019-10-02
Dyke	2019-10-02 22:49:00	12.164	6.189	57.6427	0	57.6427	2019-10-02
Dyke	2019-10-02 22:59:00	12.146	6.151	57.2654	0	57.2654	2019-10-02
Dyke	2019-10-02 23:09:00	12.235	6.147	57.3437	0	57.3437	2019-10-02
Dyke	2019-10-02 23:19:00	12.182	6.113	56.9581	0	56.9581	2019-10-02
Dyke	2019-10-02 23:29:00	12.208	5.987	55.817	0	55.817	2019-10-02
Dyke	2019-10-02 23:39:00	12.2	5.905	55.0425	0	55.0425	2019-10-02
Dyke	2019-10-02 23:49:00	12.208	5.805	54.1202	0	54.1202	2019-10-02
Dyke	2019-10-02 23:59:00	12.2	5.686	53.0011	0	53.0011	2019-10-02
Dyke	2019-10-03 00:09:00	12.271	6.313	58.9403	0	58.9403	2019-10-03
Dyke	2019-10-03 00:19:00	12.279	6.514	60.8279	0	60.8279	2019-10-03
Dyke	2019-10-03 00:29:00	12.244	6.522	60.8544	0	60.8544	2019-10-03
Dyke	2019-10-03 00:39:00	12.2	6.502	60.6073	0	60.6073	2019-10-03
Dyke	2019-10-03 00:49:00	12.182	6.496	60.5267	0	60.5267	2019-10-03
Dyke	2019-10-03 00:59:00	12.048	6.546	60.8073	0	60.8073	2019-10-03
Dyke	2019-10-03 01:09:00	12.022	6.628	61.5327	0	61.5327	2019-10-03
Dyke	2019-10-03 01:19:00	11.915	6.738	62.4017	0	62.4017	2019-10-03
Dyke	2019-10-03 01:29:00	11.852	6.842	63.274	0	63.274	2019-10-03
Dyke	2019-10-03 01:39:00	11.861	6.971	64.4802	0	64.4802	2019-10-03
Dyke	2019-10-03 01:49:00	11.781	7.086	65.4244	0	65.4244	2019-10-03
Dyke	2019-10-03 01:59:00	11.745	7.118	65.6658	0	65.6658	2019-10-03
Dyke	2019-10-03 02:09:00	11.736	7.131	65.7722	0	65.7722	2019-10-03
Dyke	2019-10-03 02:19:00	11.727	7.174	66.1552	0	66.1552	2019-10-03
Dyke	2019-10-03 02:29:00	11.647	7.198	66.2552	0	66.2552	2019-10-03
Dyke	2019-10-03 02:39:00	11.692	7.191	66.2589	0	66.2589	2019-10-03
Dyke	2019-10-03 02:49:00	11.611	7.187	66.0994	0	66.0994	2019-10-03
Dyke	2019-10-03 02:59:00	11.602	7.18	66.0214	0	66.0214	2019-10-03
Dyke	2019-10-03 03:09:00	11.558	7.159	65.762	0	65.762	2019-10-03
Dyke	2019-10-03 03:19:00	11.504	7.161	65.6989	0	65.6989	2019-10-03
Dyke	2019-10-03 03:29:00	11.486	7.12	65.2958	0	65.2958	2019-10-03
Dyke	2019-10-03 03:39:00	11.486	7.079	64.9198	0	64.9198	2019-10-03
Dyke	2019-10-03 03:49:00	11.45	7.025	64.3713	0	64.3713	2019-10-03
Dyke	2019-10-03 03:59:00	11.414	7.005	64.135	0	64.135	2019-10-03
Dyke	2019-10-03 04:09:00	11.36	6.96	63.6439	0	63.6439	2019-10-03
Dyke	2019-10-03 04:19:00	11.27	6.97	63.6034	0	63.6034	2019-10-03
Dyke	2019-10-03 04:29:00	11.351	6.912	63.1919	0	63.1919	2019-10-03
Dyke	2019-10-03 04:39:00	11.261	6.911	63.052	0	63.052	2019-10-03
Dyke	2019-10-03 04:49:00	11.234	6.925	63.1404	0	63.1404	2019-10-03
Dyke	2019-10-03 04:59:00	11.207	6.888	62.7639	0	62.7639	2019-10-03
Dyke	2019-10-03 05:09:00	11.162	6.858	62.4257	0	62.4257	2019-10-03
Dyke	2019-10-03 05:19:00	11.18	6.843	62.3151	0	62.3151	2019-10-03
Dyke	2019-10-03 05:29:00	11.099	6.859	62.344	0	62.344	2019-10-03
Dyke	2019-10-03 05:39:00	11.081	6.819	61.9547	0	61.9547	2019-10-03
Dyke	2019-10-03 05:49:00	11.099	6.773	61.5623	0	61.5623	2019-10-03
Dyke	2019-10-03 05:59:00	11.018	6.773	61.4471	0	61.4471	2019-10-03
Dyke	2019-10-03 06:09:00	10.982	6.749	61.1783	0	61.1783	2019-10-03
Dyke	2019-10-03 06:19:00	11.009	6.688	60.6633	0	60.6633	2019-10-03
Dyke	2019-10-03 06:29:00	10.991	6.669	60.4658	0	60.4658	2019-10-03
Dyke	2019-10-03 06:39:00	10.919	6.651	60.202	0	60.202	2019-10-03
Dyke	2019-10-03 06:49:00	10.892	6.628	59.9563	0	59.9563	2019-10-03
Dyke	2019-10-03 06:59:00	10.892	6.608	59.7754	0	59.7754	2019-10-03
Dyke	2019-10-03 07:09:00	10.874	6.567	59.3797	0	59.3797	2019-10-03
Dyke	2019-10-03 07:19:00	10.819	6.516	58.8434	0	58.8434	2019-10-03
Dyke	2019-10-03 07:29:00	10.72	6.511	58.663	0	58.663	2019-10-03
Dyke	2019-10-03 07:39:00	10.81	6.472	58.4338	0	58.4338	2019-10-03
Dyke	2019-10-03 07:49:00	10.756	6.47	58.3425	0	58.3425	2019-10-03
Dyke	2019-10-03 07:59:00	10.738	6.489	58.4893	0	58.4893	2019-10-03
Dyke	2019-10-03 08:09:00	10.684	6.493	58.4518	0	58.4518	2019-10-03
Dyke	2019-10-03 08:19:00	10.738	6.435	58.0026	0	58.0026	2019-10-03
Dyke	2019-10-03 08:29:00	10.729	6.456	58.1797	0	58.1797	2019-10-03
Dyke	2019-10-03 08:39:00	10.693	6.465	58.212	0	58.212	2019-10-03
Dyke	2019-10-03 08:49:00	10.693	6.441	57.9959	0	57.9959	2019-10-03
Dyke	2019-10-03 08:59:00	10.747	6.41	57.7893	0	57.7893	2019-10-03
Dyke	2019-10-03 09:09:00	10.711	6.416	57.795	0	57.795	2019-10-03
Dyke	2019-10-03 09:19:00	10.693	6.402	57.6447	0	57.6447	2019-10-03
Dyke	2019-10-03 09:29:00	10.693	6.493	58.4641	0	58.4641	2019-10-03
Dyke	2019-10-03 09:39:00	10.729	6.521	58.7654	0	58.7654	2019-10-03
Dyke	2019-10-03 09:49:00	10.738	6.622	59.6881	0	59.6881	2019-10-03
Dyke	2019-10-03 09:59:00	10.711	6.637	59.7857	0	59.7857	2019-10-03
Dyke	2019-10-03 10:09:00	10.765	6.645	59.933	0	59.933	2019-10-03
Dyke	2019-10-03 10:19:00	10.729	6.631	59.7567	0	59.7567	2019-10-03
Dyke	2019-10-03 10:29:00	10.792	6.597	59.5375	0	59.5375	2019-10-03
Dyke	2019-10-03 10:39:00	10.865	6.613	59.7831	0	59.7831	2019-10-03
Dyke	2019-10-03 10:49:00	10.829	6.661	60.1668	0	60.1668	2019-10-03
Dyke	2019-10-03 10:59:00	10.847	6.74	60.9058	0	60.9058	2019-10-03
Dyke	2019-10-03 11:09:00	10.847	6.777	61.2401	0	61.2401	2019-10-03
Dyke	2019-10-03 11:19:00	10.901	6.691	60.5388	0	60.5388	2019-10-03
Dyke	2019-10-03 11:29:00	10.865	6.772	61.2205	0	61.2205	2019-10-03
Dyke	2019-10-03 11:39:00	10.883	6.861	62.051	0	62.051	2019-10-03
Dyke	2019-10-03 11:49:00	10.919	7.098	64.2481	0	64.2481	2019-10-03
Dyke	2019-10-03 11:59:00	10.901	7.226	65.3794	0	65.3794	2019-10-03
Dyke	2019-10-03 12:09:00	10.919	7.407	67.045	0	67.045	2019-10-03
Dyke	2019-10-03 12:19:00	10.901	7.511	67.958	0	67.958	2019-10-03
Dyke	2019-10-03 12:29:00	10.973	7.534	68.28	0	68.28	2019-10-03
Dyke	2019-10-03 12:39:00	10.91	7.368	66.6781	0	66.6781	2019-10-03
Dyke	2019-10-03 12:49:00	10.874	7.213	65.2209	0	65.2209	2019-10-03
Dyke	2019-10-03 12:59:00	10.874	7.246	65.5193	0	65.5193	2019-10-03
Dyke	2019-10-03 13:09:00	10.865	7.434	67.2052	0	67.2052	2019-10-03
Dyke	2019-10-03 13:19:00	10.829	7.615	68.784	0	68.784	2019-10-03
Dyke	2019-10-03 13:29:00	10.856	7.725	69.8213	0	69.8213	2019-10-03
Dyke	2019-10-03 13:39:00	10.829	7.936	71.6834	0	71.6834	2019-10-03
Dyke	2019-10-03 13:49:00	10.738	8.196	73.8755	0	73.8755	2019-10-03
Dyke	2019-10-03 13:59:00	10.838	8.258	74.6076	0	74.6076	2019-10-03
Dyke	2019-10-03 14:09:00	10.801	8.345	75.3288	0	75.3288	2019-10-03
Dyke	2019-10-03 14:19:00	10.847	8.385	75.7708	0	75.7708	2019-10-03
Dyke	2019-10-03 14:29:00	10.856	8.396	75.886	0	75.886	2019-10-03
Dyke	2019-10-03 14:39:00	10.901	8.397	75.9744	0	75.9744	2019-10-03
Dyke	2019-10-03 14:49:00	10.937	8.172	74.0004	0	74.0004	2019-10-03
Dyke	2019-10-03 14:59:00	10.819	8.097	73.1207	0	73.1207	2019-10-03
Dyke	2019-10-03 15:09:00	10.91	8.053	72.8771	0	72.8771	2019-10-03
Dyke	2019-10-03 15:19:00	10.91	7.999	72.3885	0	72.3885	2019-10-03
Dyke	2019-10-03 15:29:00	10.883	7.985	72.2165	0	72.2165	2019-10-03
Dyke	2019-10-03 15:39:00	10.883	8.076	73.0395	0	73.0395	2019-10-03
Dyke	2019-10-03 15:49:00	10.892	8.09	73.1814	0	73.1814	2019-10-03
Dyke	2019-10-03 15:59:00	10.91	8.097	73.2753	0	73.2753	2019-10-03
Dyke	2019-10-03 16:09:00	10.946	8.167	73.9705	0	73.9705	2019-10-03
Dyke	2019-10-03 16:19:00	10.928	8.206	74.2927	0	74.2927	2019-10-03
Dyke	2019-10-03 16:29:00	10.982	8.311	75.3376	0	75.3376	2019-10-03
Dyke	2019-10-03 16:39:00	10.973	8.426	76.3641	0	76.3641	2019-10-03
Dyke	2019-10-03 16:49:00	11.009	8.535	77.4165	0	77.4165	2019-10-03
Dyke	2019-10-03 16:59:00	11.036	8.645	78.4632	0	78.4632	2019-10-03
Dyke	2019-10-03 17:09:00	10.964	8.847	80.1629	0	80.1629	2019-10-03
Dyke	2019-10-03 17:19:00	11.018	8.81	79.9275	0	79.9275	2019-10-03
Dyke	2019-10-03 17:29:00	11	8.807	79.867	0	79.867	2019-10-03
Dyke	2019-10-03 17:39:00	11.045	8.818	80.0501	0	80.0501	2019-10-03
Dyke	2019-10-03 17:49:00	11.099	8.878	80.6955	0	80.6955	2019-10-03
Dyke	2019-10-03 17:59:00	11.027	8.972	81.4142	0	81.4142	2019-10-03
Dyke	2019-10-03 18:09:00	11.081	8.937	81.1979	0	81.1979	2019-10-03
Dyke	2019-10-03 18:19:00	11.09	8.956	81.3875	0	81.3875	2019-10-03
Dyke	2019-10-03 18:29:00	11.072	8.942	81.2265	0	81.2265	2019-10-03
Dyke	2019-10-03 18:39:00	11.09	9.112	82.8051	0	82.8051	2019-10-03
Dyke	2019-10-03 18:49:00	11.054	9.1	82.6273	0	82.6273	2019-10-03
Dyke	2019-10-03 18:59:00	11.027	8.974	81.4323	0	81.4323	2019-10-03
Dyke	2019-10-03 19:09:00	11.072	8.746	79.4461	0	79.4461	2019-10-03
Dyke	2019-10-03 19:19:00	11.126	8.642	78.5994	0	78.5994	2019-10-03
Dyke	2019-10-03 19:29:00	11.171	8.657	78.8177	0	78.8177	2019-10-03
Dyke	2019-10-03 19:39:00	11.153	8.687	79.058	0	79.058	2019-10-03
Dyke	2019-10-03 19:49:00	11.117	8.579	78.0102	0	78.0102	2019-10-03
Dyke	2019-10-03 19:59:00	11.162	8.338	75.8976	0	75.8976	2019-10-03
Dyke	2019-10-03 20:09:00	11.234	8.254	75.2579	0	75.2579	2019-10-03
Dyke	2019-10-03 20:19:00	11.288	8.198	74.8404	0	74.8404	2019-10-03
Dyke	2019-10-03 20:29:00	11.324	8.22	75.1034	0	75.1034	2019-10-03
Dyke	2019-10-03 20:39:00	11.297	8.479	77.4217	0	77.4217	2019-10-03
Dyke	2019-10-03 20:49:00	11.333	8.769	80.1361	0	80.1361	2019-10-03
Dyke	2019-10-03 20:59:00	11.297	8.725	79.6679	0	79.6679	2019-10-03
Dyke	2019-10-03 21:09:00	11.261	8.711	79.4741	0	79.4741	2019-10-03
Dyke	2019-10-03 21:19:00	11.243	8.765	79.9336	0	79.9336	2019-10-03
Dyke	2019-10-03 21:29:00	11.306	8.736	79.7849	0	79.7849	2019-10-03
Dyke	2019-10-03 21:39:00	11.216	8.76	79.8383	0	79.8383	2019-10-03
Dyke	2019-10-03 21:49:00	11.279	8.705	79.4523	0	79.4523	2019-10-03
Dyke	2019-10-03 21:59:00	11.189	8.637	78.6683	0	78.6683	2019-10-03
Dyke	2019-10-03 22:09:00	11.18	8.637	78.6519	0	78.6519	2019-10-03
Dyke	2019-10-03 22:19:00	11.198	8.633	78.6482	0	78.6482	2019-10-03
Dyke	2019-10-03 22:29:00	11.234	8.619	78.5858	0	78.5858	2019-10-03
Dyke	2019-10-03 22:39:00	11.126	8.596	78.181	0	78.181	2019-10-03
Dyke	2019-10-03 22:49:00	11.198	8.509	77.5185	0	77.5185	2019-10-03
Dyke	2019-10-03 22:59:00	11.099	8.475	77.0324	0	77.0324	2019-10-03
Dyke	2019-10-03 23:09:00	11.162	8.4	76.4619	0	76.4619	2019-10-03
Dyke	2019-10-03 23:19:00	11.072	8.317	75.5491	0	75.5491	2019-10-03
Dyke	2019-10-03 23:29:00	11.117	8.335	75.7915	0	75.7915	2019-10-03
Dyke	2019-10-03 23:39:00	11.117	8.32	75.6551	0	75.6551	2019-10-03
Dyke	2019-10-03 23:49:00	11.108	8.283	75.3029	0	75.3029	2019-10-03
Dyke	2019-10-03 23:59:00	11.072	8.267	75.095	0	75.095	2019-10-03
Dyke	2019-10-04 00:09:00	11.072	8.229	74.7498	0	74.7498	2019-10-04
Dyke	2019-10-04 00:19:00	11.144	8.182	74.4466	0	74.4466	2019-10-04
Dyke	2019-10-04 00:29:00	11.009	8.21	74.4686	0	74.4686	2019-10-04
Dyke	2019-10-04 00:39:00	11.009	8.142	73.8518	0	73.8518	2019-10-04
Dyke	2019-10-04 00:49:00	11.027	8.137	73.8372	0	73.8372	2019-10-04
Dyke	2019-10-04 00:59:00	11.009	8.106	73.5252	0	73.5252	2019-10-04
Dyke	2019-10-04 01:09:00	11	8.012	72.6575	0	72.6575	2019-10-04
Dyke	2019-10-04 01:19:00	10.91	8.036	72.7233	0	72.7233	2019-10-04
Dyke	2019-10-04 01:29:00	10.955	8.01	72.5637	0	72.5637	2019-10-04
Dyke	2019-10-04 01:39:00	10.928	8.031	72.7084	0	72.7084	2019-10-04
Dyke	2019-10-04 01:49:00	10.973	7.968	72.2133	0	72.2133	2019-10-04
Dyke	2019-10-04 01:59:00	10.91	7.976	72.1803	0	72.1803	2019-10-04
Dyke	2019-10-04 02:09:00	10.91	7.937	71.8274	0	71.8274	2019-10-04
Dyke	2019-10-04 02:19:00	10.973	7.874	71.3614	0	71.3614	2019-10-04
Dyke	2019-10-04 02:29:00	10.901	7.851	71.0343	0	71.0343	2019-10-04
Dyke	2019-10-04 02:39:00	10.838	7.649	69.1055	0	69.1055	2019-10-04
Dyke	2019-10-04 02:49:00	10.955	7.591	68.7679	0	68.7679	2019-10-04
Dyke	2019-10-04 02:59:00	10.892	7.61	68.8394	0	68.8394	2019-10-04
Dyke	2019-10-04 03:09:00	10.955	7.539	68.2968	0	68.2968	2019-10-04
Dyke	2019-10-04 03:19:00	11.018	7.449	67.58	0	67.58	2019-10-04
Dyke	2019-10-04 03:29:00	10.982	7.399	67.0705	0	67.0705	2019-10-04
Dyke	2019-10-04 03:39:00	11.045	7.342	66.6509	0	66.6509	2019-10-04
Dyke	2019-10-04 03:49:00	11.045	7.334	66.5783	0	66.5783	2019-10-04
Dyke	2019-10-04 03:59:00	11.009	7.306	66.2689	0	66.2689	2019-10-04
Dyke	2019-10-04 04:09:00	10.991	7.251	65.7426	0	65.7426	2019-10-04
Dyke	2019-10-04 04:19:00	10.982	7.226	65.5023	0	65.5023	2019-10-04
Dyke	2019-10-04 04:29:00	11.054	7.169	65.094	0	65.094	2019-10-04
Dyke	2019-10-04 04:39:00	11.018	7.192	65.2484	0	65.2484	2019-10-04
Dyke	2019-10-04 04:49:00	11.036	7.075	64.2137	0	64.2137	2019-10-04
Dyke	2019-10-04 04:59:00	11.072	6.931	62.9591	0	62.9591	2019-10-04
Dyke	2019-10-04 05:09:00	11.036	6.939	62.9793	0	62.9793	2019-10-04
Dyke	2019-10-04 05:19:00	11.063	6.847	62.1832	0	62.1832	2019-10-04
Dyke	2019-10-04 05:29:00	11.09	6.877	62.4946	0	62.4946	2019-10-04
Dyke	2019-10-04 05:39:00	11.117	6.966	63.3429	0	63.3429	2019-10-04
Dyke	2019-10-04 05:49:00	11.054	7.02	63.741	0	63.741	2019-10-04
Dyke	2019-10-04 05:59:00	11.045	6.961	63.1922	0	63.1922	2019-10-04
Dyke	2019-10-04 06:09:00	11.09	6.886	62.5764	0	62.5764	2019-10-04
Dyke	2019-10-04 06:19:00	11.018	6.642	60.2586	0	60.2586	2019-10-04
Dyke	2019-10-04 06:29:00	11.072	6.82	61.9508	0	61.9508	2019-10-04
Dyke	2019-10-04 06:39:00	11.126	6.834	62.1555	0	62.1555	2019-10-04
Dyke	2019-10-04 06:49:00	11.09	6.853	62.2765	0	62.2765	2019-10-04
Dyke	2019-10-04 06:59:00	11.09	6.83	62.0675	0	62.0675	2019-10-04
Dyke	2019-10-04 07:09:00	11.126	6.734	61.246	0	61.246	2019-10-04
Dyke	2019-10-04 07:19:00	11.162	6.646	60.496	0	60.496	2019-10-04
Dyke	2019-10-04 07:29:00	11.099	6.715	61.0351	0	61.0351	2019-10-04
Dyke	2019-10-04 07:39:00	11.09	6.722	61.0861	0	61.0861	2019-10-04
Dyke	2019-10-04 07:49:00	11.126	6.717	61.0914	0	61.0914	2019-10-04
Dyke	2019-10-04 07:59:00	11.144	6.688	60.853	0	60.853	2019-10-04
Dyke	2019-10-04 08:09:00	11.144	6.676	60.7438	0	60.7438	2019-10-04
Dyke	2019-10-04 08:19:00	11.153	6.659	60.6017	0	60.6017	2019-10-04
Dyke	2019-10-04 08:29:00	11.207	6.621	60.331	0	60.331	2019-10-04
Dyke	2019-10-04 08:39:00	11.144	6.596	60.0159	0	60.0159	2019-10-04
Dyke	2019-10-04 08:49:00	11.27	6.253	57.0606	0	57.0606	2019-10-04
Dyke	2019-10-04 08:59:00	11.171	6.405	58.3143	0	58.3143	2019-10-04
Dyke	2019-10-04 09:09:00	11.189	6.522	59.4042	0	59.4042	2019-10-04
Dyke	2019-10-04 09:19:00	11.171	6.621	60.2809	0	60.2809	2019-10-04
Dyke	2019-10-04 09:29:00	11.216	6.643	60.544	0	60.544	2019-10-04
Dyke	2019-10-04 09:39:00	11.198	6.617	60.282	0	60.282	2019-10-04
Dyke	2019-10-04 09:49:00	11.252	6.569	59.9193	0	59.9193	2019-10-04
Dyke	2019-10-04 09:59:00	11.18	6.657	60.6213	0	60.6213	2019-10-04
Dyke	2019-10-04 10:09:00	11.207	6.603	60.167	0	60.167	2019-10-04
Dyke	2019-10-04 10:19:00	11.243	6.559	59.8157	0	59.8157	2019-10-04
Dyke	2019-10-04 10:29:00	11.27	6.62	60.4096	0	60.4096	2019-10-04
Dyke	2019-10-04 10:39:00	11.306	6.592	60.204	0	60.204	2019-10-04
Dyke	2019-10-04 10:49:00	11.27	6.577	60.0172	0	60.0172	2019-10-04
Dyke	2019-10-04 10:59:00	11.288	6.698	61.1467	0	61.1467	2019-10-04
Dyke	2019-10-04 11:09:00	11.252	6.822	62.2271	0	62.2271	2019-10-04
Dyke	2019-10-04 11:19:00	11.252	6.871	62.674	0	62.674	2019-10-04
Dyke	2019-10-04 11:29:00	11.369	6.876	62.8888	0	62.8888	2019-10-04
Dyke	2019-10-04 11:39:00	11.351	6.98	63.8136	0	63.8136	2019-10-04
Dyke	2019-10-04 11:49:00	11.378	7.118	65.1157	0	65.1157	2019-10-04
Dyke	2019-10-04 11:59:00	11.369	7.205	65.8979	0	65.8979	2019-10-04
Dyke	2019-10-04 12:09:00	11.342	7.156	65.4091	0	65.4091	2019-10-04
Dyke	2019-10-04 12:19:00	11.369	7.101	64.9467	0	64.9467	2019-10-04
Dyke	2019-10-04 12:29:00	11.333	7.246	66.218	0	66.218	2019-10-04
Dyke	2019-10-04 12:39:00	11.423	7.35	67.3076	0	67.3076	2019-10-04
Dyke	2019-10-04 12:49:00	11.396	7.417	67.879	0	67.879	2019-10-04
Dyke	2019-10-04 12:59:00	11.414	7.382	67.5867	0	67.5867	2019-10-04
Dyke	2019-10-04 13:09:00	11.387	7.303	66.8219	0	66.8219	2019-10-04
Dyke	2019-10-04 13:19:00	11.459	7.305	66.9509	0	66.9509	2019-10-04
Dyke	2019-10-04 13:29:00	11.486	7.272	66.6898	0	66.6898	2019-10-04
Dyke	2019-10-04 13:39:00	11.441	7.275	66.6484	0	66.6484	2019-10-04
Dyke	2019-10-04 13:49:00	11.45	7.302	66.9095	0	66.9095	2019-10-04
Dyke	2019-10-04 13:59:00	11.513	7.311	67.089	0	67.089	2019-10-04
Dyke	2019-10-04 14:09:00	11.45	7.341	67.2669	0	67.2669	2019-10-04
Dyke	2019-10-04 14:19:00	11.477	7.307	66.9969	0	66.9969	2019-10-04
Dyke	2019-10-04 14:29:00	11.468	7.312	67.0289	0	67.0289	2019-10-04
Dyke	2019-10-04 14:39:00	11.504	7.363	67.5522	0	67.5522	2019-10-04
Dyke	2019-10-04 14:49:00	11.459	7.351	67.3725	0	67.3725	2019-10-04
Dyke	2019-10-04 14:59:00	11.522	7.294	66.9468	0	66.9468	2019-10-04
Dyke	2019-10-04 15:09:00	11.504	7.304	67.0109	0	67.0109	2019-10-04
Dyke	2019-10-04 15:19:00	11.486	7.329	67.2125	0	67.2125	2019-10-04
Dyke	2019-10-04 15:29:00	11.584	7.297	67.0696	0	67.0696	2019-10-04
Dyke	2019-10-04 15:39:00	11.504	7.273	66.7265	0	66.7265	2019-10-04
Dyke	2019-10-04 15:49:00	11.593	7.231	66.4767	0	66.4767	2019-10-04
Dyke	2019-10-04 15:59:00	11.593	7.251	66.6605	0	66.6605	2019-10-04
Dyke	2019-10-04 16:09:00	11.549	7.339	67.4015	0	67.4015	2019-10-04
Dyke	2019-10-04 16:19:00	11.584	7.349	67.5475	0	67.5475	2019-10-04
Dyke	2019-10-04 16:29:00	11.549	7.451	68.4302	0	68.4302	2019-10-04
Dyke	2019-10-04 16:39:00	11.575	7.607	69.9045	0	69.9045	2019-10-04
Dyke	2019-10-04 16:49:00	11.593	7.676	70.5677	0	70.5677	2019-10-04
Dyke	2019-10-04 16:59:00	11.575	7.718	70.9245	0	70.9245	2019-10-04
Dyke	2019-10-04 17:09:00	11.638	7.698	70.8429	0	70.8429	2019-10-04
Dyke	2019-10-04 17:19:00	11.611	7.699	70.8083	0	70.8083	2019-10-04
Dyke	2019-10-04 17:29:00	11.629	7.683	70.6903	0	70.6903	2019-10-04
Dyke	2019-10-04 17:39:00	11.584	7.686	70.645	0	70.645	2019-10-04
Dyke	2019-10-04 17:49:00	11.611	7.692	70.7439	0	70.7439	2019-10-04
Dyke	2019-10-04 17:59:00	11.611	7.73	71.0934	0	71.0934	2019-10-04
Dyke	2019-10-04 18:09:00	11.674	7.777	71.6289	0	71.6289	2019-10-04
Dyke	2019-10-04 18:19:00	11.665	7.799	71.8168	0	71.8168	2019-10-04
Dyke	2019-10-04 18:29:00	11.656	7.951	73.2014	0	73.2014	2019-10-04
Dyke	2019-10-04 18:39:00	11.692	8.011	73.8145	0	73.8145	2019-10-04
Dyke	2019-10-04 18:49:00	11.665	7.988	73.5571	0	73.5571	2019-10-04
Dyke	2019-10-04 18:59:00	11.701	6.901	63.5999	0	63.5999	2019-10-04
Dyke	2019-10-04 19:09:00	11.71	7.25	66.8301	0	66.8301	2019-10-04
Dyke	2019-10-04 19:19:00	11.727	7.343	67.7136	0	67.7136	2019-10-04
Dyke	2019-10-04 19:29:00	11.763	7.401	68.3046	0	68.3046	2019-10-04
Dyke	2019-10-04 19:39:00	11.736	7.446	68.6776	0	68.6776	2019-10-04
Dyke	2019-10-04 19:49:00	11.763	7.603	70.1689	0	70.1689	2019-10-04
Dyke	2019-10-04 19:59:00	11.826	7.777	71.8781	0	71.8781	2019-10-04
Dyke	2019-10-04 20:09:00	11.754	7.959	73.4394	0	73.4394	2019-10-04
Dyke	2019-10-04 20:19:00	11.763	8.032	74.1282	0	74.1282	2019-10-04
Dyke	2019-10-04 20:29:00	11.799	8.056	74.4109	0	74.4109	2019-10-04
Dyke	2019-10-04 20:39:00	11.754	8.078	74.5374	0	74.5374	2019-10-04
Dyke	2019-10-04 20:49:00	11.799	8.068	74.5217	0	74.5217	2019-10-04
Dyke	2019-10-04 20:59:00	11.772	8.076	74.5496	0	74.5496	2019-10-04
Dyke	2019-10-04 21:09:00	11.835	8.057	74.4813	0	74.4813	2019-10-04
Dyke	2019-10-04 21:19:00	11.852	8.052	74.4639	0	74.4639	2019-10-04
Dyke	2019-10-04 21:29:00	11.852	8.022	74.1865	0	74.1865	2019-10-04
Dyke	2019-10-04 21:39:00	11.808	8.023	74.1213	0	74.1213	2019-10-04
Dyke	2019-10-04 21:49:00	11.844	8.09	74.8017	0	74.8017	2019-10-04
Dyke	2019-10-04 21:59:00	11.835	8.165	75.4796	0	75.4796	2019-10-04
Dyke	2019-10-04 22:09:00	11.87	8.172	75.6047	0	75.6047	2019-10-04
Dyke	2019-10-04 22:19:00	11.861	8.097	74.8954	0	74.8954	2019-10-04
Dyke	2019-10-04 22:29:00	11.852	8.052	74.4639	0	74.4639	2019-10-04
Dyke	2019-10-04 22:39:00	11.933	7.983	73.9622	0	73.9622	2019-10-04
Dyke	2019-10-04 22:49:00	11.897	7.974	73.8183	0	73.8183	2019-10-04
Dyke	2019-10-04 22:59:00	11.87	7.963	73.6711	0	73.6711	2019-10-04
Dyke	2019-10-04 23:09:00	11.933	7.969	73.8325	0	73.8325	2019-10-04
Dyke	2019-10-04 23:19:00	11.906	7.993	74.0093	0	74.0093	2019-10-04
Dyke	2019-10-04 23:29:00	11.986	7.933	73.5877	0	73.5877	2019-10-04
Dyke	2019-10-04 23:39:00	11.959	7.883	73.079	0	73.079	2019-10-04
Dyke	2019-10-04 23:49:00	11.951	7.777	72.0832	0	72.0832	2019-10-04
Dyke	2019-10-04 23:59:00	12.022	7.762	72.0604	0	72.0604	2019-10-04
Dyke	2019-10-05 00:09:00	12.128	7.429	69.1352	0	69.1352	2019-10-05
Dyke	2019-10-05 00:19:00	12.075	6.91	64.228	0	64.228	2019-10-05
Dyke	2019-10-05 00:29:00	12.022	6.657	61.8019	0	61.8019	2019-10-05
Dyke	2019-10-05 00:39:00	12.057	6.516	60.541	0	60.541	2019-10-05
Dyke	2019-10-05 00:49:00	12.066	6.505	60.4512	0	60.4512	2019-10-05
Dyke	2019-10-05 00:59:00	12.093	6.444	59.9211	0	59.9211	2019-10-05
Dyke	2019-10-05 01:09:00	12.066	6.488	60.2932	0	60.2932	2019-10-05
Dyke	2019-10-05 01:19:00	12.128	6.586	61.2902	0	61.2902	2019-10-05
Dyke	2019-10-05 01:29:00	12.066	6.686	62.1332	0	62.1332	2019-10-05
Dyke	2019-10-05 01:39:00	12.004	6.78	62.918	0	62.918	2019-10-05
Dyke	2019-10-05 01:49:00	12.057	6.727	62.5015	0	62.5015	2019-10-05
Dyke	2019-10-05 01:59:00	12.066	6.709	62.347	0	62.347	2019-10-05
Dyke	2019-10-05 02:09:00	12.084	6.683	62.1307	0	62.1307	2019-10-05
Dyke	2019-10-05 02:19:00	12.093	6.673	62.0505	0	62.0505	2019-10-05
Dyke	2019-10-05 02:29:00	12.128	6.632	61.7182	0	61.7182	2019-10-05
Dyke	2019-10-05 02:39:00	12.057	6.563	60.9777	0	60.9777	2019-10-05
Dyke	2019-10-05 02:49:00	12.075	6.492	60.3427	0	60.3427	2019-10-05
Dyke	2019-10-05 02:59:00	12.128	6.446	59.9873	0	59.9873	2019-10-05
Dyke	2019-10-05 03:09:00	12.111	6.424	59.7595	0	59.7595	2019-10-05
Dyke	2019-10-05 03:19:00	12.102	6.358	59.1334	0	59.1334	2019-10-05
Dyke	2019-10-05 03:29:00	12.066	6.319	58.7227	0	58.7227	2019-10-05
Dyke	2019-10-05 03:39:00	12.093	6.616	61.5204	0	61.5204	2019-10-05
Dyke	2019-10-05 03:49:00	12.031	6.756	62.7338	0	62.7338	2019-10-05
Dyke	2019-10-05 03:59:00	12.04	6.801	63.1646	0	63.1646	2019-10-05
Dyke	2019-10-05 04:09:00	12.031	6.795	63.096	0	63.096	2019-10-05
Dyke	2019-10-05 04:19:00	11.995	6.777	62.8773	0	62.8773	2019-10-05
Dyke	2019-10-05 04:29:00	12.013	6.746	62.6153	0	62.6153	2019-10-05
Dyke	2019-10-05 04:39:00	11.968	6.736	62.4585	0	62.4585	2019-10-05
Dyke	2019-10-05 04:49:00	11.986	6.667	61.8441	0	61.8441	2019-10-05
Dyke	2019-10-05 04:59:00	11.844	6.652	61.5057	0	61.5057	2019-10-05
Dyke	2019-10-05 05:09:00	11.897	6.581	60.9227	0	60.9227	2019-10-05
Dyke	2019-10-05 05:19:00	11.835	6.542	60.4762	0	60.4762	2019-10-05
Dyke	2019-10-05 05:29:00	11.844	6.468	59.8044	0	59.8044	2019-10-05
Dyke	2019-10-05 05:39:00	11.79	6.417	59.2597	0	59.2597	2019-10-05
Dyke	2019-10-05 05:49:00	11.763	6.365	58.7433	0	58.7433	2019-10-05
Dyke	2019-10-05 05:59:00	11.727	6.286	57.9665	0	57.9665	2019-10-05
Dyke	2019-10-05 06:09:00	11.683	6.218	57.2818	0	57.2818	2019-10-05
Dyke	2019-10-05 06:19:00	11.647	6.184	56.9216	0	56.9216	2019-10-05
Dyke	2019-10-05 06:29:00	11.665	6.102	56.19	0	56.19	2019-10-05
Dyke	2019-10-05 06:39:00	11.629	6.046	55.6285	0	55.6285	2019-10-05
Dyke	2019-10-05 06:49:00	11.611	5.977	54.9709	0	54.9709	2019-10-05
Dyke	2019-10-05 06:59:00	11.54	5.923	54.3857	0	54.3857	2019-10-05
Dyke	2019-10-05 07:09:00	11.513	5.888	54.0309	0	54.0309	2019-10-05
Dyke	2019-10-05 07:19:00	11.486	5.854	53.6856	0	53.6856	2019-10-05
Dyke	2019-10-05 07:29:00	11.504	5.771	52.9463	0	52.9463	2019-10-05
Dyke	2019-10-05 07:39:00	11.477	5.724	52.4826	0	52.4826	2019-10-05
Dyke	2019-10-05 07:49:00	11.477	5.66	51.8958	0	51.8958	2019-10-05
Dyke	2019-10-05 07:59:00	11.495	5.612	51.4769	0	51.4769	2019-10-05
Dyke	2019-10-05 08:09:00	11.423	5.588	51.1721	0	51.1721	2019-10-05
Dyke	2019-10-05 08:19:00	11.396	5.568	50.9573	0	50.9573	2019-10-05
Dyke	2019-10-05 08:29:00	11.414	5.51	50.4474	0	50.4474	2019-10-05
Dyke	2019-10-05 08:39:00	11.414	5.453	49.9255	0	49.9255	2019-10-05
Dyke	2019-10-05 08:49:00	11.441	5.42	49.6542	0	49.6542	2019-10-05
Dyke	2019-10-05 08:59:00	11.441	5.394	49.416	0	49.416	2019-10-05
Dyke	2019-10-05 09:09:00	11.396	5.4	49.4198	0	49.4198	2019-10-05
Dyke	2019-10-05 09:19:00	11.387	5.414	49.5377	0	49.5377	2019-10-05
Dyke	2019-10-05 09:29:00	11.378	5.435	49.7195	0	49.7195	2019-10-05
Dyke	2019-10-05 09:39:00	11.414	5.466	50.0445	0	50.0445	2019-10-05
Dyke	2019-10-05 09:49:00	11.459	5.463	50.0688	0	50.0688	2019-10-05
Dyke	2019-10-05 09:59:00	11.477	5.484	50.282	0	50.282	2019-10-05
Dyke	2019-10-05 10:09:00	11.522	5.468	50.1871	0	50.1871	2019-10-05
Dyke	2019-10-05 10:19:00	11.504	5.49	50.3683	0	50.3683	2019-10-05
Dyke	2019-10-05 10:29:00	11.495	5.614	51.4953	0	51.4953	2019-10-05
Dyke	2019-10-05 10:39:00	11.495	5.727	52.5318	0	52.5318	2019-10-05
Dyke	2019-10-05 10:49:00	11.531	5.734	52.6395	0	52.6395	2019-10-05
Dyke	2019-10-05 10:59:00	11.575	5.804	53.3358	0	53.3358	2019-10-05
Dyke	2019-10-05 11:09:00	11.566	5.999	55.1164	0	55.1164	2019-10-05
Dyke	2019-10-05 11:19:00	11.566	6.196	56.9264	0	56.9264	2019-10-05
Dyke	2019-10-05 11:29:00	11.611	6.257	57.5461	0	57.5461	2019-10-05
Dyke	2019-10-05 11:39:00	11.638	6.402	58.9161	0	58.9161	2019-10-05
Dyke	2019-10-05 11:49:00	11.674	6.29	57.9331	0	57.9331	2019-10-05
Dyke	2019-10-05 11:59:00	11.647	6.335	58.3115	0	58.3115	2019-10-05
[truncated: 583,935+ more rows]

## Sheet: Source Fig 3
	DO	Temperature
hr	mg/l	°C
10.28.00	7.61	28.2
10.33.00	7.58	28.2
10.38.00	7.53	28				N-NH4	N-NO3	DON
10.43.00	7.26	28			10.12.00	0.06	0.22	0.44
10.48.00	7.26	28			11.00.00	0.01	0.19	0.54
10.53.00	6.96	28.1			11.50.00	0.01	0.15	0.85
10.58.00	7.15	28.1			12.50.00	0.01	0.14	0.84
11.03.00	7.41	28.2			14.51.00	0.02	0.11	1.01
11.08.00	7.27	28.3			15.40.00	0.01	0.03	0.92
11.13.00	7.24	28.4			15.50.00	0.01	0.03	1.17
11.18.00	7.34	28.5
11.23.00	7.5	28.5
11.28.00	7.79	28.6
11.33.00	7.54	28.6
11.38.00	7.56	28.6
11.43.00	7.95	28.6
11.48.00	7.75	28.6
11.53.00	8	28.7
11.58.00	8.1	28.7
12.03.00	7.83	28.7
12.08.00	7.55	28.9
12.13.00	7.75	28.9
12.18.00	7.7	29
12.23.00	7.74	29.1
12.28.00	7.8	29.1
12.33.00	7.96	29.2
12.38.00	7.84	29.3
12.43.00	7.83	29.4
12.48.00	7.65	29.5
12.53.00	7.86	29.7
12.58.00	8.16	29.8
13.03.00	8.33	29.9
13.08.00	8.14	30
13.13.00	8.5	30.2
13.18.00	8.33	30.4
13.23.00	8.85	30.7
13.28.00	9.22	30.9
13.33.00	9.19	31.3
13.38.00	9.67	31.6
13.43.00	10.04	31.9
13.48.00	10.56	32.3
13.53.00	10.25	32.5
13.58.00	10.82	32.7
14.03.00	11	32.9
14.08.00	11.53	33.3
14.13.00	12.1	33.7
14.18.00	12.33	34
14.23.00	13.11	34.3
14.28.00	13.25	34.7
14.33.00	13.27	35

## Sheet: Data source
Environment	Data Source
Freshwater dikes UK	Booth et al. 2023 Science of the Total Environment Accepted for publication
Venice lagoon	Data From Venice Lagoon are available from the Hydrological station “Umberto D’Ancona” at Chioggia, Italy, here: https://chioggia.biologia.unipd.it/en/the-database/parameters-of-lagoon/2017/
Mangrove	Giomi, F., Barausse, A., Duarte, C.M., Booth, J., Agusti, S., Saderne, V., Anton, A., Daffonchio, D. and Fusi, M., 2019. Oxygen supersaturation protects coastal marine fauna from ocean warming. Science advances, 5(9), p.eaax1814.
Seagrasses	Giomi, F., Barausse, A., Duarte, C.M., Booth, J., Agusti, S., Saderne, V., Anton, A., Daffonchio, D. and Fusi, M., 2019. Oxygen supersaturation protects coastal marine fauna from ocean warming. Science advances, 5(9), p.eaax1814.
Coral	Giomi, F., Barausse, A., Duarte, C.M., Booth, J., Agusti, S., Saderne, V., Anton, A., Daffonchio, D. and Fusi, M., 2019. Oxygen supersaturation protects coastal marine fauna from ocean warming. Science advances, 5(9), p.eaax1814.
Kelp	Krause-Jensen, D., Marba, N., Sanz-Martin, M., Hendriks, I. E., Thyrring, J., Carstensen, J., Sejr, M. K., and Duarte, C. M.: Long photoperiods sustain high pH in Arctic kelp forests, Sci. Adv., 2, e1501938–e1501938, https://doi.org/10.1126/sciadv.1501938, 2016.
Freshwater Sweden	Andersen, M. R., Kragh, T., and Sand-Jensen, K.: Extreme diel dissolved oxygen and carbon cycles in shallow vegetated lakes., Proceedings. Biol. Sci., 284, 20171427, https://doi.org/10.1098/rspb.2017.1427, 2017.
Freshwater UK	Booth et al. 2023 Science of the Total Environment Accepted for publication
Prevost Laggon	Data collection was coordinated wihtin the project LabEx DRIIHM, French Programme “Investissements d’Avenir” (ANR-11-LABX-0010) which is managed by the French ANR, under the Human- Environment Observatory “Mediterranean coast” (OHM LittoralMéditerranéen) and with the agreement of the compagnons de Maguelonne.
Rove Canale	Data was collected within the projec of the syndicat mixte GIPREB and the Mairie de Chateauneuf-les-Martigues.
Bolmon Lagoon	Data was collected within the projec of the syndicat mixte GIPREB and the Mairie de Chateauneuf-les-Martigues.
Berre Lagoon	Data collected within the Excellence Initiative of Aix-Marseille University - A*MIDEX, a French “Investissements d’Avenir” programme (reference number ANR-11-IDEX-0001- 02) (PREDHYPO Program), the CNRS-INSU-EC2CO program (PREDHYP- O2 program) and the PACA region with the support of the syndicat mixte GIPREB.
